# Supplementary material for: Effect of Dimethyl Fumarate vs Interferon β-1a in Patients With Pediatric-Onset Multiple Sclerosis: The CONNECT Randomized Clinical Trial
Source: PubMed Central journal article supplement — JAMA Netw Open. 2022 Sep 28;5(9):e2230439. doi: 10.1001/jamanetworkopen.2022.30439 (PMC9520348; doi:10.1001/jamanetworkopen.2022.30439), 2022-09-28
Supplement: jamanetwopen-e2230439-s001.pdf [file jamanetwopen-e2230439-s001.pdf]

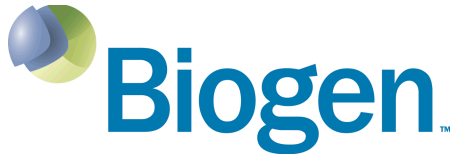

**PROTOCOL NUMBER:** 109MS306

**PHASE OF DEVELOPMENT:** 3

**PROTOCOL TITLE:** Open-Label, Randomized, Multicenter, Multiple-Dose, Active-Controlled, Parallel-Group, Efficacy and Safety Study of BG00012 in Children From 10 to Less Than 18 Years of Age With Relapsing-Remitting Multiple Sclerosis, With Optional Open-Label Extension

**EUDRA CT NUMBER:** 2013-002318-11

**DATE:** 25 July 2017  
Version 5  
**FINAL**  
Supersedes previous Version 4 dated 08 February 2016

Biogen MA Inc.  
225 Binney Street  
Cambridge, MA 02142  
United States

Biogen Idec Research Limited  
Innovation House  
70 Norden Road  
Maidenhead Berkshire  
SL6 4AY  
United Kingdom

CONFIDENTIAL

The information contained herein may not be used, disclosed, or published without the written consent of Biogen MA Inc.

## SPONSOR SIGNATURE PAGE

Protocol 109MS306, Version 5.0 was approved by:

PPD

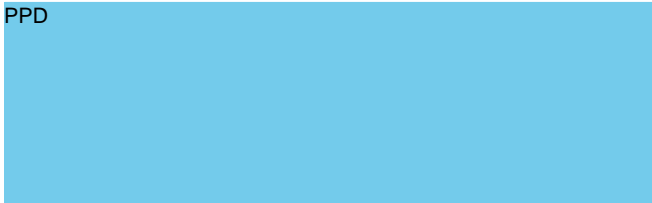

25 July 2017

Date

Biogen

CONFIDENTIAL

The information contained herein may not be used, disclosed, or published without the written consent of  
Biogen MA Inc.

## SPONSOR SIGNATURE PAGE

Protocol 109MS306, Version 5.0 was approved by:

PPD

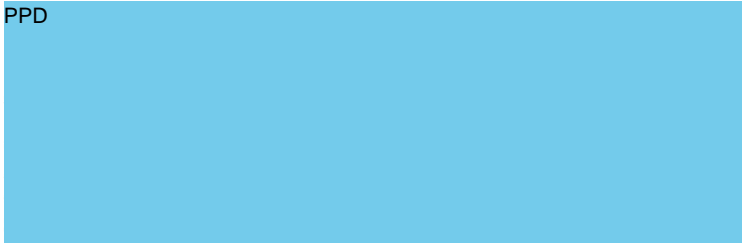

*28 July 2012*

\_\_\_\_\_  
Date

Biogen

CONFIDENTIAL

The information contained herein may not be used, disclosed, or published without the written consent of Biogen MA Inc.

## TABLE OF CONTENTS

|                                                                      |    |
|----------------------------------------------------------------------|----|
| SPONSOR SIGNATURE PAGE .....                                         | 2  |
| 1. SPONSOR INFORMATION .....                                         | 11 |
| 2. LIST OF ABBREVIATIONS.....                                        | 12 |
| 3. SYNOPSIS .....                                                    | 14 |
| 4. STUDY SCHEMATIC AND SCHEDULE OF EVENTS FOR STUDY<br>109MS306..... | 25 |
| 4.1. Study Schematics for Parts 1 and 2 .....                        | 25 |
| 4.2. Schedule of Events .....                                        | 28 |
| 4.3. Additional Information .....                                    | 39 |
| 4.3.1. Blood Volumes .....                                           | 39 |
| 4.3.2. Site Personnel .....                                          | 41 |
| 5. INTRODUCTION.....                                                 | 44 |
| 5.1. Profile of Previous Experience .....                            | 44 |
| 5.1.1. Preclinical Experience With BG00012.....                      | 44 |
| 5.1.2. Relevant Clinical Experience With BG00012.....                | 44 |
| 5.2. Study Rationale.....                                            | 46 |
| 5.3. Rationale for Dose and Schedule Selection.....                  | 47 |
| 6. PART 1 .....                                                      | 48 |
| 6.1. Part 1 Main Objectives .....                                    | 48 |
| 6.2. Part 1 Endpoints.....                                           | 48 |
| 6.2.1. Primary Endpoint.....                                         | 48 |
| 6.2.2. Secondary Endpoints .....                                     | 48 |
| 6.2.3. Exploratory Endpoints .....                                   | 49 |
| 6.3. Part 1 Study Design .....                                       | 49 |
| 6.3.1. Overview.....                                                 | 49 |
| 6.3.2. Overall Part 1 Duration and Follow-Up .....                   | 51 |
| 6.3.2.1. Treatment.....                                              | 51 |
| 6.3.2.2. Post-Treatment.....                                         | 51 |
| 6.3.2.3. Follow-Up.....                                              | 52 |
| 6.3.3. Relapses .....                                                | 52 |

CONFIDENTIAL

The information contained herein may not be used, disclosed, or published without the written consent of  
Biogen MA Inc.

|          |                                                                                                                                                          |    |
|----------|----------------------------------------------------------------------------------------------------------------------------------------------------------|----|
| 6.3.3.1. | Treatment of Relapses on Scheduled or Unscheduled Visits .....                                                                                           | 53 |
| 6.4.     | Part 1 Selection of Subjects .....                                                                                                                       | 53 |
| 6.4.1.   | Inclusion Criteria .....                                                                                                                                 | 53 |
| 6.4.2.   | Exclusion Criteria .....                                                                                                                                 | 54 |
| 6.5.     | Part 1 Enrollment and Randomization Procedures .....                                                                                                     | 57 |
| 6.5.1.   | Enrollment and Screening.....                                                                                                                            | 57 |
| 6.5.2.   | Randomization of Subjects .....                                                                                                                          | 57 |
| 6.5.3.   | Blinding Procedures.....                                                                                                                                 | 58 |
| 6.6.     | Part 1 Treatment of Subjects.....                                                                                                                        | 58 |
| 6.6.1.   | Treatment Schedule and Administration .....                                                                                                              | 58 |
| 6.6.1.1. | BG00012.....                                                                                                                                             | 58 |
| 6.6.1.2. | Interferon $\beta$ -1a (Avonex).....                                                                                                                     | 58 |
| 6.6.2.   | Treatment Precautions .....                                                                                                                              | 59 |
| 6.6.2.1. | Management of Subjects Receiving Avonex.....                                                                                                             | 59 |
| 6.6.3.   | Modification of Dose and/or Treatment Schedule for BG00012 .....                                                                                         | 59 |
| 6.6.3.1. | BG00012 Dose Reduction .....                                                                                                                             | 59 |
| 6.6.3.2. | BG00012 Dosing Interruption for Abnormal Laboratory Values .....                                                                                         | 59 |
| 6.6.3.3. | Resumption of Dosing With BG00012.....                                                                                                                   | 61 |
| 6.6.3.4. | Subsequent Development of Additional Laboratory Abnormalities .....                                                                                      | 61 |
| 6.6.3.5. | Abnormal Urinalyses That Require Additional Evaluation.....                                                                                              | 61 |
| 6.6.4.   | Schedule for Subjects Treated With BG00012 With Abnormal Lymphocyte<br>Count.....                                                                        | 62 |
| 6.6.4.1. | Schedule in Part 1 for Subjects Treated With BG00012 With Lymphocyte<br>Count <LLN.....                                                                  | 62 |
| 6.6.4.2. | Schedule for Subjects Who Complete, Temporarily Withhold, or<br>Permanently Discontinue BG00012 for Any Reason and Have a<br>Lymphocyte Count <LLN ..... | 63 |
| 6.6.5.   | Treatment Compliance.....                                                                                                                                | 66 |
| 6.6.6.   | Concomitant Therapy and Procedures .....                                                                                                                 | 66 |
| 6.6.6.1. | Concomitant Therapy .....                                                                                                                                | 66 |
| 6.6.6.2. | Concomitant Procedures .....                                                                                                                             | 67 |
| 6.6.6.3. | Treatment of Relapses on Scheduled or Unscheduled Visits .....                                                                                           | 67 |
| 6.6.7.   | Continuation of Treatment.....                                                                                                                           | 67 |

CONFIDENTIAL

The information contained herein may not be used, disclosed, or published without the written consent of  
Biogen MA Inc.

|          |                                                                           |    |
|----------|---------------------------------------------------------------------------|----|
| 6.7.     | Part 1 Withdrawal of Subjects From Study Treatment and/or the Study ..... | 68 |
| 6.7.1.   | Discontinuation of Study Treatment.....                                   | 68 |
| 6.7.2.   | Withdrawal of Subjects From Study.....                                    | 69 |
| 6.8.     | Part 1 Study Treatment Management .....                                   | 69 |
| 6.8.1.   | BG00012.....                                                              | 69 |
| 6.8.1.1. | BG00012 Preparation .....                                                 | 70 |
| 6.8.1.2. | BG00012 Storage.....                                                      | 70 |
| 6.8.1.3. | BG00012 Handling and Disposal .....                                       | 70 |
| 6.8.1.4. | BG00012 Accountability .....                                              | 70 |
| 6.8.2.   | Comparator Product.....                                                   | 71 |
| 6.8.2.1. | Interferon $\beta$ -1a (Avonex) Preparation .....                         | 71 |
| 6.8.2.2. | Interferon $\beta$ -1a (Avonex) Storage.....                              | 71 |
| 6.8.2.3. | Interferon $\beta$ -1a (Avonex) Handling and Disposal .....               | 72 |
| 6.9.     | Part 1 Efficacy Assessments.....                                          | 72 |
| 6.9.1.   | MRI Efficacy Assessments.....                                             | 72 |
| 6.9.2.   | Clinical Efficacy Assessments.....                                        | 72 |
| 6.9.3.   | Additional Assessments.....                                               | 75 |
| 6.10.    | Part 1 Safety Assessments .....                                           | 75 |
| 6.10.1.  | Clinical Safety Assessments .....                                         | 75 |
| 6.10.2.  | Laboratory and Radiological Safety Assessments.....                       | 75 |
| 7.       | PART 2 .....                                                              | 77 |
| 7.1.     | Part 2 Objectives.....                                                    | 77 |
| 7.2.     | Part 2 Endpoints.....                                                     | 77 |
| 7.2.1.1. | Primary Endpoint.....                                                     | 77 |
| 7.2.1.2. | Secondary Endpoints .....                                                 | 77 |
| 7.3.     | Part 2 Study Design .....                                                 | 77 |
| 7.3.1.   | Overview.....                                                             | 77 |
| 7.3.2.   | Overall Part 2 Duration and Follow-Up .....                               | 78 |
| 7.3.2.1. | Day 1 of Part 2 (Part 1 Week 96) .....                                    | 78 |
| 7.3.2.2. | Treatment.....                                                            | 78 |
| 7.3.2.3. | Post-Treatment.....                                                       | 78 |

CONFIDENTIAL

The information contained herein may not be used, disclosed, or published without the written consent of  
Biogen MA Inc.

|          |                                                                                                                                                    |    |
|----------|----------------------------------------------------------------------------------------------------------------------------------------------------|----|
| 7.3.2.4. | Follow-Up.....                                                                                                                                     | 78 |
| 7.3.3.   | Relapses .....                                                                                                                                     | 79 |
| 7.3.3.1. | Treatment of Relapses on Scheduled or Unscheduled Visits .....                                                                                     | 79 |
| 7.3.4.   | Study Stopping Rules .....                                                                                                                         | 79 |
| 7.3.5.   | End of Study .....                                                                                                                                 | 79 |
| 7.4.     | Part 2 Selection of Subjects .....                                                                                                                 | 79 |
| 7.4.1.   | Inclusion Criteria .....                                                                                                                           | 79 |
| 7.4.2.   | Exclusion Criteria .....                                                                                                                           | 80 |
| 7.5.     | Part 2 Enrollment Procedures .....                                                                                                                 | 81 |
| 7.5.1.   | Enrollment and Baseline Assessments .....                                                                                                          | 81 |
| 7.6.     | Part 2 Treatment of Subjects.....                                                                                                                  | 81 |
| 7.6.1.   | Study Treatment Schedule and Administration .....                                                                                                  | 81 |
| 7.6.2.   | Treatment Precautions .....                                                                                                                        | 81 |
| 7.6.3.   | Modification of Dose and/or Treatment Schedule for BG00012 .....                                                                                   | 81 |
| 7.6.4.   | Treatment Schedule for Subjects With Abnormal Lymphocyte Count.....                                                                                | 82 |
| 7.6.4.1. | Schedule in Part 2 for Subjects With Lymphocyte Count <LLN .....                                                                                   | 82 |
| 7.6.4.2. | Schedule for Subjects Who Complete, Temporarily Withhold, or Permanently Discontinue BG00012 for Any Reason and Have a Lymphocyte Count <LLN ..... | 82 |
| 7.6.5.   | Treatment Compliance.....                                                                                                                          | 82 |
| 7.6.6.   | Concomitant Therapy and Procedures.....                                                                                                            | 82 |
| 7.7.     | Part 2 Withdrawal of Subjects From Study Treatment and/or the Study .....                                                                          | 82 |
| 7.8.     | Part 2 Study Treatment Management .....                                                                                                            | 83 |
| 7.9.     | Part 2 Efficacy Assessments.....                                                                                                                   | 83 |
| 7.10.    | Part 2 Safety Assessments .....                                                                                                                    | 83 |
| 8.       | SAFETY DEFINITIONS, MONITORING, AND REPORTING .....                                                                                                | 84 |
| 8.1.     | Definitions .....                                                                                                                                  | 84 |
| 8.1.1.   | Serious Pretreatment Event.....                                                                                                                    | 84 |
| 8.1.2.   | Adverse Event.....                                                                                                                                 | 84 |
| 8.1.3.   | Serious Adverse Event.....                                                                                                                         | 84 |
| 8.2.     | Monitoring and Recording Events.....                                                                                                               | 85 |
| 8.2.1.   | Serious Pretreatment Events .....                                                                                                                  | 85 |

CONFIDENTIAL

The information contained herein may not be used, disclosed, or published without the written consent of  
Biogen MA Inc.

|          |                                                                            |    |
|----------|----------------------------------------------------------------------------|----|
| 8.2.2.   | Adverse Events .....                                                       | 85 |
| 8.2.3.   | Serious Adverse Events .....                                               | 85 |
| 8.2.4.   | All Events .....                                                           | 85 |
| 8.2.5.   | Immediate Reporting of Serious Adverse Events.....                         | 86 |
| 8.2.5.1. | Deaths .....                                                               | 86 |
| 8.3.     | Safety Classifications.....                                                | 86 |
| 8.3.1.   | Relationship of Events to Study Treatment.....                             | 86 |
| 8.3.2.   | Severity of Events.....                                                    | 87 |
| 8.3.3.   | Expectedness of Events .....                                               | 87 |
| 8.4.     | Prescheduled or Elective Procedures or Routinely Scheduled Treatments..... | 87 |
| 8.5.     | Procedures for Handling Special Situations .....                           | 88 |
| 8.5.1.   | Overdose .....                                                             | 88 |
| 8.5.2.   | Medical Emergency.....                                                     | 88 |
| 8.5.3.   | Contraception Requirements .....                                           | 88 |
| 8.5.4.   | Pregnancy .....                                                            | 89 |
| 8.5.5.   | Regulatory Reporting.....                                                  | 89 |
| 8.6.     | Investigator Responsibilities.....                                         | 89 |
| 8.7.     | Biogen Responsibilities .....                                              | 90 |
| 9.       | STATISTICAL METHODS AND DETERMINATION OF SAMPLE SIZE.....                  | 91 |
| 9.1.     | Part 1 .....                                                               | 91 |
| 9.1.1.   | Description of Objectives .....                                            | 91 |
| 9.1.2.   | Description of Endpoints .....                                             | 91 |
| 9.1.3.   | Demography and Baseline Disease Characteristics.....                       | 91 |
| 9.1.4.   | Efficacy.....                                                              | 91 |
| 9.1.4.1. | Analysis Population.....                                                   | 91 |
| 9.1.4.2. | General Methods of Analysis .....                                          | 91 |
| 9.1.4.3. | Primary Endpoint Analysis.....                                             | 92 |
| 9.1.4.4. | Secondary Endpoints Analysis .....                                         | 92 |
| 9.1.4.5. | Exploratory Endpoints Analysis .....                                       | 94 |
| 9.1.5.   | Safety .....                                                               | 94 |
| 9.1.5.1. | Analysis Population.....                                                   | 94 |

CONFIDENTIAL

The information contained herein may not be used, disclosed, or published without the written consent of  
Biogen MA Inc.



|          |                                                            |     |
|----------|------------------------------------------------------------|-----|
| 9.1.5.2. | Methods of Analysis .....                                  | 94  |
| 9.1.6.   | Sample Size Considerations .....                           | 95  |
| 9.2.     | Part 2 .....                                               | 96  |
| 9.2.1.   | Description of Objectives .....                            | 96  |
| 9.2.2.   | Description of Endpoints .....                             | 96  |
| 9.2.2.1. | General Methods of Analysis .....                          | 96  |
| 9.2.3.   | Demography and Baseline Disease Characteristics.....       | 96  |
| 9.2.4.   | Efficacy.....                                              | 96  |
| 9.2.4.1. | Analysis Population.....                                   | 96  |
| 9.2.5.   | Safety.....                                                | 96  |
| 9.2.6.   | Interim Analyses .....                                     | 96  |
| 9.2.7.   | Sample Size Considerations .....                           | 97  |
| 10.      | ETHICAL REQUIREMENTS .....                                 | 98  |
| 10.1.    | Declaration of Helsinki.....                               | 98  |
| 10.2.    | Ethics Committee.....                                      | 98  |
| 10.3.    | Subject Information and Consent .....                      | 98  |
| 10.4.    | Subject Data Protection .....                              | 99  |
| 10.5.    | Compensation for Injury.....                               | 99  |
| 10.6.    | Conflict of Interest.....                                  | 99  |
| 10.7.    | Registration of Study and Disclosure of Study Results..... | 99  |
| 11.      | ADMINISTRATIVE PROCEDURES .....                            | 100 |
| 11.1.    | Study Site Initiation .....                                | 100 |
| 11.2.    | Quality Assurance.....                                     | 100 |
| 11.3.    | Monitoring of the Study.....                               | 100 |
| 11.4.    | Study Funding.....                                         | 100 |
| 11.5.    | Publications.....                                          | 100 |
| 12.      | FURTHER REQUIREMENTS AND GENERAL INFORMATION.....          | 101 |
| 12.1.    | External Contract Organizations.....                       | 101 |
| 12.1.1.  | Contract Research Organization.....                        | 101 |
| 12.1.2.  | Interactive Voice/Web Response System.....                 | 101 |
| 12.1.3.  | Remote Data Capture.....                                   | 101 |

CONFIDENTIAL

The information contained herein may not be used, disclosed, or published without the written consent of  
Biogen MA Inc.

|         |                                                                       |     |
|---------|-----------------------------------------------------------------------|-----|
| 12.1.4. | Central Laboratories for Laboratory Assessments .....                 | 101 |
| 12.1.5. | Central Facility for Other Assessments .....                          | 101 |
| 12.2.   | Study Committees.....                                                 | 101 |
| 12.3.   | Changes to Final Study Protocol .....                                 | 101 |
| 12.4.   | Ethics Committee Notification of Study Completion or Termination..... | 102 |
| 12.5.   | Retention of Study Data.....                                          | 102 |
| 12.6.   | Study Report Signatory.....                                           | 102 |
| 13.     | REFERENCES .....                                                      | 103 |
| 14.     | SIGNED AGREEMENT OF THE STUDY PROTOCOL.....                           | 104 |

### LIST OF TABLES

|           |                                                                                                                       |    |
|-----------|-----------------------------------------------------------------------------------------------------------------------|----|
| Table 1:  | Study Activities - Part 1.....                                                                                        | 28 |
| Table 2:  | Study Activities (Unscheduled and Post-Treatment Visits) - Part 1 .....                                               | 31 |
| Table 3:  | Study Activities - Part 2.....                                                                                        | 34 |
| Table 4:  | Study Activities (Unscheduled and Post-Treatment Visits) - Part 2 .....                                               | 37 |
| Table 5:  | Blood Volumes by Visit - Part 1.....                                                                                  | 40 |
| Table 6:  | Blood Volumes by Visit - Part 2 Treatment Period.....                                                                 | 40 |
| Table 7:  | Blood Volumes for Unscheduled and Post-Treatment Visits for Part 2.....                                               | 40 |
| Table 8:  | Laboratory Criteria Requiring Withholding or Permanent Discontinuation of<br>BG00012 Treatment .....                  | 60 |
| Table 9:  | Lymphocyte Count Criteria Requiring Additional Testing and/or Permanent<br>Discontinuation of BG00012 Treatment ..... | 63 |
| Table 10: | Criteria to Determine Clinically Relevant Abnormalities in Vital Signs .....                                          | 95 |

### LIST OF FIGURES

|           |                                                                                                                                                          |    |
|-----------|----------------------------------------------------------------------------------------------------------------------------------------------------------|----|
| Figure 1: | Study Design for the Randomized Phase - Part 1 .....                                                                                                     | 26 |
| Figure 2: | Study Design - Part 2 Extension.....                                                                                                                     | 27 |
| Figure 3: | Schedule for Subjects Who Complete, Temporarily Withhold, or<br>Permanently Discontinue BG00012 for Any Reason and Have a<br>Lymphocyte Count <LLN ..... | 65 |
| Figure 4: | Flow Diagram for Relapse Evaluation .....                                                                                                                | 74 |

CONFIDENTIAL

The information contained herein may not be used, disclosed, or published without the written consent of  
Biogen MA Inc.

## 1. SPONSOR INFORMATION

|                     |                              |
|---------------------|------------------------------|
| Biogen MA Inc.      | Biogen Idec Research Limited |
| 225 Binney Street   | Innovation House             |
| Cambridge, MA 02142 | 70 Norden Road               |
| United States       | Maidenhead, Berkshire        |
|                     | SL6 4AY                      |
|                     | United Kingdom               |

For urgent medical issues in which the study's Medical Director should be contacted, please refer to the Study Reference Guide's Official Study Contact List for complete contact information.

Biogen may transfer any or all of its study-related responsibilities to a contract research organization and other third parties; however, Biogen retains overall accountability for these activities.

CONFIDENTIAL

The information contained herein may not be used, disclosed, or published without the written consent of Biogen MA Inc.

## 2. LIST OF ABBREVIATIONS

|                 |                                            |
|-----------------|--------------------------------------------|
| AE              | adverse event                              |
| ALT             | alanine transaminase                       |
| ANCOVA          | analysis of covariance                     |
| ARR             | annualized relapse rate                    |
| AST             | aspartate transaminase                     |
| BID             | twice daily                                |
| BUN             | blood urea nitrogen                        |
| BVMT-R          | Brief Visuospatial Memory Test - Revised   |
| CI              | confidence interval                        |
| CNS             | central nervous system                     |
| CRO             | contract research organization             |
| CSR             | clinical study report                      |
| DHA             | Directions for Handling and Administration |
| DMF             | dimethyl fumarate                          |
| DSMB            | Data Safety Monitoring Board               |
| EC              | ethics committee                           |
| ECG             | electrocardiogram                          |
| eCRF            | electronic case report form                |
| EDSS            | Expanded Disability Status Scale           |
| FSH             | follicle-stimulating hormone               |
| GCP             | Good Clinical Practice                     |
| Gd              | gadolinium                                 |
| GGT             | gamma-glutamyl-transferase                 |
| GI              | gastrointestinal                           |
| HbcAb           | hepatitis B core antibody                  |
| HbsAb           | hepatitis B surface antibody               |
| HbsAg           | Hepatitis B surface antigen                |
| ICF             | informed consent form                      |
| ICH             | International Conference on Harmonisation  |
| IFN $\beta$     | interferon $\beta$                         |
| IFN $\beta$ -1a | interferon $\beta$ -1a                     |
| IM              | intramuscular                              |
| ITT             | Intent-to-Treat                            |
| IV              | intravenous                                |
| IVMP            | intravenous methylprednisolone             |
| IXRS            | Interactive Voice/Web Response System      |
| LH              | luteinizing hormone                        |
| LLN             | lower limit of normal                      |
| MMF             | monomethyl fumarate                        |
| MRI             | magnetic resonance imaging                 |

CONFIDENTIAL

The information contained herein may not be used, disclosed, or published without the written consent of Biogen MA Inc.

|        |                                               |
|--------|-----------------------------------------------|
| MS     | multiple sclerosis                            |
| PedsQL | Pediatric Quality of Life Inventory           |
| PHI    | protected health information                  |
| RDC    | remote data capture                           |
| RRMS   | relapsing-remitting multiple sclerosis        |
| SABR   | Safety and Benefit-Risk Management            |
| SAE    | serious adverse event                         |
| SAP    | Statistical Analysis Plan                     |
| SD     | standard deviation                            |
| SDMT   | Symbol Digit Modalities Test                  |
| SUSAR  | suspected unexpected serious adverse reaction |
| TID    | 3 times daily                                 |
| ULN    | upper limit of normal                         |
| US     | United States                                 |
| WBC    | white blood cell                              |

CONFIDENTIAL

The information contained herein may not be used, disclosed, or published without the written consent of Biogen MA Inc.

### 3. SYNOPSIS

This is a brief summary. For details refer to the body of the protocol.

Protocol Number: 109MS306

Protocol Title: Open-Label, Randomized, Multicenter, Multiple-Dose, Active-Controlled, Parallel-Group, Efficacy and Safety Study of BG00012 in Children From 10 to Less Than 18 Years of Age With Relapsing-Remitting Multiple Sclerosis, With Optional Open-Label Extension

Version Number: 5

Name of Study Treatment: BG00012 (dimethyl fumarate; Tecfidera<sup>®</sup>)

Study Indication: Multiple sclerosis (MS)

Phase of Development: 3

Rationale for the Study: Study 109MS306 is designed to collect data to evaluate the safety, tolerability, and efficacy of BG00012 in pediatric subjects with relapsing-remitting multiple sclerosis (RRMS).

In adult subjects with RRMS, BG00012 demonstrated efficacy and safety in 2 large Phase 3 studies, Study 109MS301 (DEFINE) and Study 109MS302 (CONFIRM), and BG00012 (Tecfidera) has been approved in the United States and other countries for adult use. In these Phase 3 studies, BG00012 had a significant effect on clinical endpoints of relapses and disability, as well as magnetic resonance imaging (MRI) endpoints, including the number and volume of new or newly enlarging T2 hyperintense lesions, gadolinium (Gd)-enhancing lesions, and new T1 hypointense lesions compared with placebo. These effects were seen as early as 6 months and were maintained over the 2 years of the studies.

With no approved MS therapies in the pediatric population, there exists a significant need for approved treatment options. In the adult population, BG00012 is a therapeutic option with demonstrated efficacy and an acceptable tolerability and safety profile combined with the ease of oral

CONFIDENTIAL

The information contained herein may not be used, disclosed, or published without the written consent of Biogen MA Inc.

administration. This study is being conducted in 2 parts:

Part 1, the randomized, active control phase, will assess the safety, tolerability, efficacy, and health outcomes of BG00012 in pediatric subjects with RRMS compared with a disease-modifying treatment.

Part 2, the extension phase of the study, will assess the long-term safety and health outcomes in BG00012-treated subjects with RRMS.

Study Objectives and Endpoints:

### **Part 1 (Randomized Phase) Objectives**

The main objectives of Part 1 are as follows:

- To evaluate the safety, tolerability, and efficacy of BG00012 in pediatric subjects with RRMS, as compared with a disease-modifying treatment
- To assess health outcomes and evolution of disability

### **Part 1 Endpoints**

Primary: The primary endpoint of Part 1 is the proportion of subjects free of new or newly enlarging T2 hyperintense lesions on brain MRI scans at Week 96.

Secondary:

- Number of new or newly enlarging T2 hyperintense lesions on brain MRI scans at Weeks 24 and 96
- Proportion of subjects free of new or newly enlarging T2 hyperintense lesions on brain MRI scans at Weeks 24 and 48
- Proportion of subjects free of new MRI activity (i.e., free of Gd-enhancing and free of new or newly enlarging T2 MRI lesions on brain MRI scans) at Weeks 24, 48, and 96
- Time to first relapse
- Proportion of subjects free of relapse up to

CONFIDENTIAL

The information contained herein may not be used, disclosed, or published without the written consent of Biogen MA Inc.

Week 96

- Annualized relapse rate (ARR) at Weeks 48 and 96
- Incidence of adverse events (AEs) and serious adverse events (SAEs), including prospective follow-up of flushing, nausea, abdominal pain, and diarrhea
- Vital signs, electrocardiograms (ECGs), and changes in clinical laboratory data, including monitoring of liver function, renal function, hematologic, and coagulation parameters
- Fatigue as measured by the Pediatric Quality of Life Inventory (PedsQL™) Multidimensional Fatigue Scale scores
- Quality of life as measured by the PedsQL
- Change from baseline to Week 96 in the Expanded Disability Status Scale (EDSS) score

Exploratory:

- Number of new or newly enlarging T2 hyperintense lesions on brain MRI scans at Weeks 48 and 72
- Proportion of subjects free of new or newly enlarging T2 hyperintense lesions on brain MRI scans at Week 72
- Proportion of subjects free of new MRI activity (i.e., free of Gd-enhancing and free of new or newly enlarging T2 MRI lesions on brain MRI scans) at Week 72
- Number of new T1 hypointense lesions on brain MRI scans at Weeks 24, 48, 72, and 96
- Number of Gd-enhancing lesions on brain MRI scans at Weeks 24, 48, 72, and 96

CONFIDENTIAL

The information contained herein may not be used, disclosed, or published without the written consent of Biogen MA Inc.



- Time to progression of disability at 96 weeks as measured by at least a 1.0 point increase on the EDSS from baseline EDSS  $\geq 1.0$  that is sustained for 12 weeks, or at least a 1.5 point increase on the EDSS from baseline EDSS = 0 that is sustained for 12 weeks
- Brief Visuospatial Memory Test - Revised (BVMT-R) scores (to assess learning/memory), Symbol Digit Modalities Test (SDMT) scores (to assess processing speed), and school progression query at Weeks 48 and 96

## **Part 2 (Extension Phase) Objectives**

The primary objective of Part 2 is to evaluate the long-term safety of BG00012 in subjects who completed Week 96 in Part 1 of Study 109MS306.

The secondary objective of Part 2 is to describe the long-term MS outcomes of BG00012 in subjects who completed Week 96 in Part 1 of Study 109MS306.

## **Part 2 Endpoints**

Primary: The primary endpoint of Part 2 is the incidence of AEs, SAEs, and discontinuations of BG00012 due to an AE.

Secondary: The secondary endpoints of Part 2 are annualized relapse rate; EDSS; cognition as measured by BVMT-R, SDMT, and school progression query; vital signs; ECGs; clinical laboratory data; changes from baseline in height, weight, and bone age; and Tanner stage.

## **Study Design:**

Part 1 will be an open-label, randomized, multicenter, multiple-dose, active-controlled, parallel-group phase to evaluate the safety, tolerability, and efficacy of daily oral BG00012 administered for 96 weeks, compared with disease-modifying treatment for pediatric MS.

Subjects will be randomly assigned in a 1:1 ratio to treatment with BG00012 or interferon  $\beta$ -1a (IFN  $\beta$ -1a). Randomization will be stratified according to whether or not the subject received therapy with IFN  $\beta$ -1a or glatiramer acetate in the 4 weeks prior to study entry and in accordance

CONFIDENTIAL

The information contained herein may not be used, disclosed, or published without the written consent of Biogen MA Inc.

with the following 3 age groups:

- 10 years to <13 years: at least 10 evaluable (for primary endpoint) subjects
- 13 to <15 years: at least 20 evaluable (for primary endpoint) subjects
- 15 to <18 years: at least 60 evaluable (for primary endpoint) subjects

The goal is to obtain a total of at least 100 evaluable subjects. At least 30 evaluable subjects must be male.

Part 2 will be an optional open-label extension phase for subjects who complete Week 96 in Part 1 and who meet the Part 2 entry criteria. Part 2 will allow for the collection of long-term (approximately 5 years) safety and MS outcomes in subjects with RRMS treated with BG00012.

#### Rationale for Dose and Schedule Selection:

Safety, tolerability, and efficacy of BG00012 240 mg twice daily (BID) have been established and evaluated in adults with MS as young as 18 years of age and with weights as low as 34.0 kg in 2 Phase 3 pivotal studies in MS. In addition, there are no apparent differences in the kinetics and metabolism across the age range from 18 to 56 years, suggesting that disposition of BG00012 is not likely to change with age.

In adults, after oral administration, dimethyl fumarate (DMF) is well absorbed and extensively metabolized by esterases to its primary active metabolite, monomethyl fumarate (MMF). Downstream metabolism of DMF/MMF occurs through the tricarboxylic acid cycle, with exhalation of CO<sub>2</sub> serving as a major route of elimination.

Published data [Zhu 2009] indicate that there were no notable differences in the expression and activities of esterases in juveniles (12 to 18 years old) when compared with adults. Furthermore, the Phase 3 clinical studies 109MS301 and 109MS302 included adults with body weights as low as 34 kg without any observed efficacy or safety concerns. For these reasons, BG00012 240 mg BID, the approved dose in adults, has been chosen for this study.

CONFIDENTIAL

The information contained herein may not be used, disclosed, or published without the written consent of Biogen MA Inc.

### *Rationale for Comparator Product*

An active comparator will be used in this open-label study because interferon  $\beta$  has been approved in some areas of the world for the treatment of pediatric MS and is commonly used in clinical practice to treat pediatric patients with MS. Avonex® (IFN  $\beta$ -1a) is marketed around the world as a therapeutic option for patients with relapsing forms of MS to slow the accumulation of physical disability and decrease the frequency of clinical exacerbations. Efficacy was demonstrated in adult patients with MS who had experienced a first clinical episode and had MRI features consistent with MS. The use of IFN  $\beta$ -1a in pediatric patients is well documented and appears to have an acceptable safety profile [Adams 1999; Ghezzi 2005; Mikaeloff 2001; Pohl 2005; Waubant and Chabas 2009].

- Study Location: This study will be conducted globally at approximately 50 centers.
- Number of Planned Subjects: Approximately 142 subjects will be enrolled.
- Study Population: Male and female subjects, aged from 10 to less than 18 years old, with RRMS who have experienced at least 1 relapse within the last 12 months prior to Day 1, or at least 2 relapses within the last 24 months prior to Day 1, or evidence of Gd-enhancing lesions of the brain on MRI within 6 weeks prior to Day 1. Subjects must be neurologically stable, with no evidence of relapse within 50 days and no evidence of corticosteroid treatment within 30 days before Day 1
- Detailed criteria are described in the protocol.
- Treatment Groups: **Part 1**
- BG00012 Treatment Group:** Subjects will receive a starting dose of BG00012 120 mg BID, orally, for 7 days followed by the maintenance dose of BG00012 240 mg BID, orally.
- Interferon Treatment Group (active control):** IFN  $\beta$ -1a (Avonex) doses will be titrated during the first 4 weeks and will be started at a dose of 7.5  $\mu$ g; the dose will be increased by 7.5  $\mu$ g each week for 3 weeks until the recommended

CONFIDENTIAL

The information contained herein may not be used, disclosed, or published without the written consent of Biogen MA Inc.

dose of 30 µg is achieved. Following titration, subjects will receive IFN β-1a (Avonex) 30 µg once weekly intramuscular.

## Part 2

Subjects will receive BG00012, 240 mg BID, orally, for 240 weeks. Subjects who were randomized to receive IFN β-1a (Avonex) in Part 1 of the study will receive a starting dose of BG00012, 120 mg BID, orally, for 7 days followed by the maintenance dose of BG00012 240 mg BID, orally, for the remainder of the study.

### Duration of Treatment and Follow-up:

In Part 1, subjects will have clinic visits at Screening (within 6 weeks of Baseline); Baseline (Day 1); and Weeks 4, 8, 12, 24, 36, 48, 60, 72, 84, and 96. At Week 2, subjects will receive a follow-up safety telephone call (see [Table 1](#) and [Table 2](#)).

Subjects who choose not to enroll in Part 2 will have a Safety Follow-Up Visit no later than 4 weeks (Week 100) after taking the final dose. Subjects who withdraw from the study prematurely will complete the Early Withdrawal Visit and the Safety Follow-Up Visit no later than 4 weeks after taking their final dose. Subjects who complete, temporarily withhold, or permanently discontinue BG00012 treatment for any reason and have a lymphocyte count less than the lower limit of normal (LLN) will be followed every 4 weeks for 24 weeks, then every 12 weeks (**or sooner, if clinically indicated or at the Investigator's discretion**) until the lymphocyte count is  $\geq$ LLN, for at least 48 weeks following BG00012 treatment discontinuation, or until initiation of another MS disease modifying therapy, whichever occurs first.

Any subject treated with BG00012 in Part 1 with a lymphocyte count  $<$ LLN being followed at the Part 1 Week 96 Visit (including subjects who completed, are temporarily withholding, or permanently discontinued BG00012 treatment) will continue follow-up within Part 2 of the study.

In Part 2, subjects will have clinic visits every 12 weeks up to Week 336 and a Safety Follow-Up Visit no later than 4 weeks after the last dose of BG00012. During Part 2, subjects who complete, temporarily withhold, or permanently discontinue study treatment for any reason and

CONFIDENTIAL

The information contained herein may not be used, disclosed, or published without the written consent of Biogen MA Inc.

have a lymphocyte count  $<LLN$  will be followed every 4 weeks for 24 weeks, then every 12 weeks (**or sooner, if clinically indicated or at the Investigator's discretion**) until the lymphocyte count is  $\geq LLN$ , for at least 48 weeks following BG00012 treatment discontinuation, or until initiation of another MS disease modifying therapy, whichever occurs first.

Criteria for Evaluation:

Efficacy:

- Brain MRI parameters will include the following:
  - new or newly enlarging T2 hyperintense lesions
  - total Gd-enhancing lesions
  - new T1 hypointense lesions
- Clinical parameters will include the following:
  - assessment of protocol-defined relapses
  - EDSS scores
  - BVMT-R scores
  - SDMT scores
  - school progression query

Health Outcomes:

The patient-reported outcomes evaluated in this study will be the PedsQL Multidimensional Fatigue Scale scores and the PedsQL scores.

Safety:

Safety will be monitored through the following:

- AEs, SAEs, and concomitant therapy and procedure recording
- physical examinations, including body weight, height, and Tanner score
- vital sign measurements, including body temperature, heart rate, systolic and diastolic blood pressure, and respiratory rate

CONFIDENTIAL

The information contained herein may not be used, disclosed, or published without the written consent of Biogen MA Inc.

- 12-lead ECG readings

The following laboratory tests will be performed:

- hematology
- blood chemistry
- coagulation (in Part 1 only)
- urine pregnancy test
- endocrine tests (until the subject has reached bone age of  $\geq 16$  years or once the subject is postmenarche): insulin-like growth factor 1, insulin-like growth factor binding protein, follicle-stimulating hormone, luteinizing hormone, estradiol, and testosterone
- urinalysis

The following radiological tests will be performed:

- Gd-enhanced MRIs for relapses
- X-ray of the left hand and wrist to determine bone age will be performed at baseline for all male subjects and for female subjects who are premenarche (if permitted by local regulatory authority) until the subject has reached bone age of  $\geq 16$  years or once the subject is postmenarche

Statistical Methods:

The primary analysis of the primary endpoint of Part 1 will include the following:

- Data will be presented as descriptive statistics and confidence intervals (CIs). The CIs for the proportion of subjects free of new or newly enlarging T2 lesions at Week 96 for each treatment group will be presented.
- Data will be summarized using observed values. No special method will be used to handle missing information.

The primary analysis of the primary endpoint of Part 2 will

CONFIDENTIAL

The information contained herein may not be used, disclosed, or published without the written consent of Biogen MA Inc.

be summaries of the incidence of treatment-emergent AEs, SAEs, and discontinuations from study treatment due to AEs.

If there are clinically relevant imbalances in important baseline characteristics, appropriate statistical methods will be used to analyze the endpoint (e.g., logistic regression) to adjust for the baseline covariates. Summary statistics and 95% CIs will be presented from the model.

A negative binomial regression model will be used to analyze the key secondary endpoint of Part 1 of the study (i.e., number of new or newly enlarging T2 hyperintense lesions at Week 24), with treatment group in the model and adjusted for age group used in the randomization stratification and the baseline number of T2 lesions. Formal statistical testing will be performed to compare the mean between the 2 treatment groups. The analysis will be based on subjects from the Intent-to-Treat (ITT) Population who have observed data at Week 24. The number of new or newly enlarging T2 hyperintense lesions at other timepoints will be analyzed in a similar way.

Analyses of other secondary efficacy endpoints in Part 1 will be based on subjects from the Completers Population, as well as subjects from the ITT Population. Missing value imputation may be performed.

Analysis of the secondary endpoints in Part 2 will include summaries of ARR and summaries of changes from baseline in EDSS, SDMT, BVMT-R scores, and school progression query; summaries of the incidence of clinically relevant vital signs, ECG, and laboratory abnormalities; summaries of changes from baseline in height, weight, and bone age; and summaries over time of Tanner stage. Data will be summarized for the overall population as well as separately for pre- and post-pubertal subjects.

**Interim Analysis:**

In Part 2, study data will be summarized periodically to support regulatory submissions or when further information on the long-term safety and efficacy of BG00012 in the pediatric population is required.

**Sample Size Determination:**

The study is not powered for the primary endpoint of Part 1. The sample size is primarily based on feasibility, with the goal of having 50 evaluable subjects at the 2-year timepoint of Part 1 for each treatment group.

CONFIDENTIAL

The information contained herein may not be used, disclosed, or published without the written consent of Biogen MA Inc.

Based on an estimated dropout rate of approximately 30% over 2 years, a total of 142 subjects will need to be enrolled to have at least 100 evaluable subjects (50 subjects/treatment group) after 2 years of treatment.

With respect to the primary endpoint of Part 1, if the proportion of subjects free of new or newly enlarging T2 hyperintense lesions is approximately 25%, the width of the 95% CI for the proportion will be approximately 0.24. If the proportion is around 40%, the width of the 95% CI will be approximately 0.28.

This sample size will provide approximately 82% power for the key secondary endpoint of Part 1 of number of new or newly enlarging T2 hyperintense lesions at Week 24. The assumptions were made based on historical data on treatment effect for IFN  $\beta$ -1a (Avonex) and BG00012 on the number of T2 hyperintense lesions compared with placebo.

It is assumed that the mean (standard deviation) will be 3.5 (6.3) and 1.22 (2.92) for the number of new or newly enlarging T2 hyperintense lesions at Week 24 for the IFN  $\beta$ -1a (Avonex) group and the BG00012 group, respectively (a 65% reduction over the IFN  $\beta$ -1a group). At Week 24, a 10% dropout rate is expected, resulting in about 63 evaluable subjects per group. Based on these assumptions, the study will have approximately 82% power to detect the difference between BG00012 and IFN  $\beta$ -1a. This power calculation is based on a negative binomial simulation.

Because Part 2 is an extension of Part 1, the sample size will be determined by the number of eligible subjects who completed Part 1 of the study.

CONFIDENTIAL

The information contained herein may not be used, disclosed, or published without the written consent of Biogen MA Inc.



## **4. STUDY SCHEMATIC AND SCHEDULE OF EVENTS FOR STUDY 109MS306**

### **4.1. Study Schematics for Parts 1 and 2**

The study design for Part 1 (Randomized Phase) of Study 109MS306 is shown in [Figure 1](#), and the study activities are shown in [Table 1](#) and [Table 2](#).

The study design for Part 2 (Extension Phase) of Study 109MS306 is shown in [Figure 2](#), and the study activities for Part 2 are shown in [Table 3](#) and [Table 4](#).

CONFIDENTIAL

The information contained herein may not be used, disclosed, or published without the written consent of Biogen MA Inc.

**Figure 1: Study Design for the Randomized Phase - Part 1**

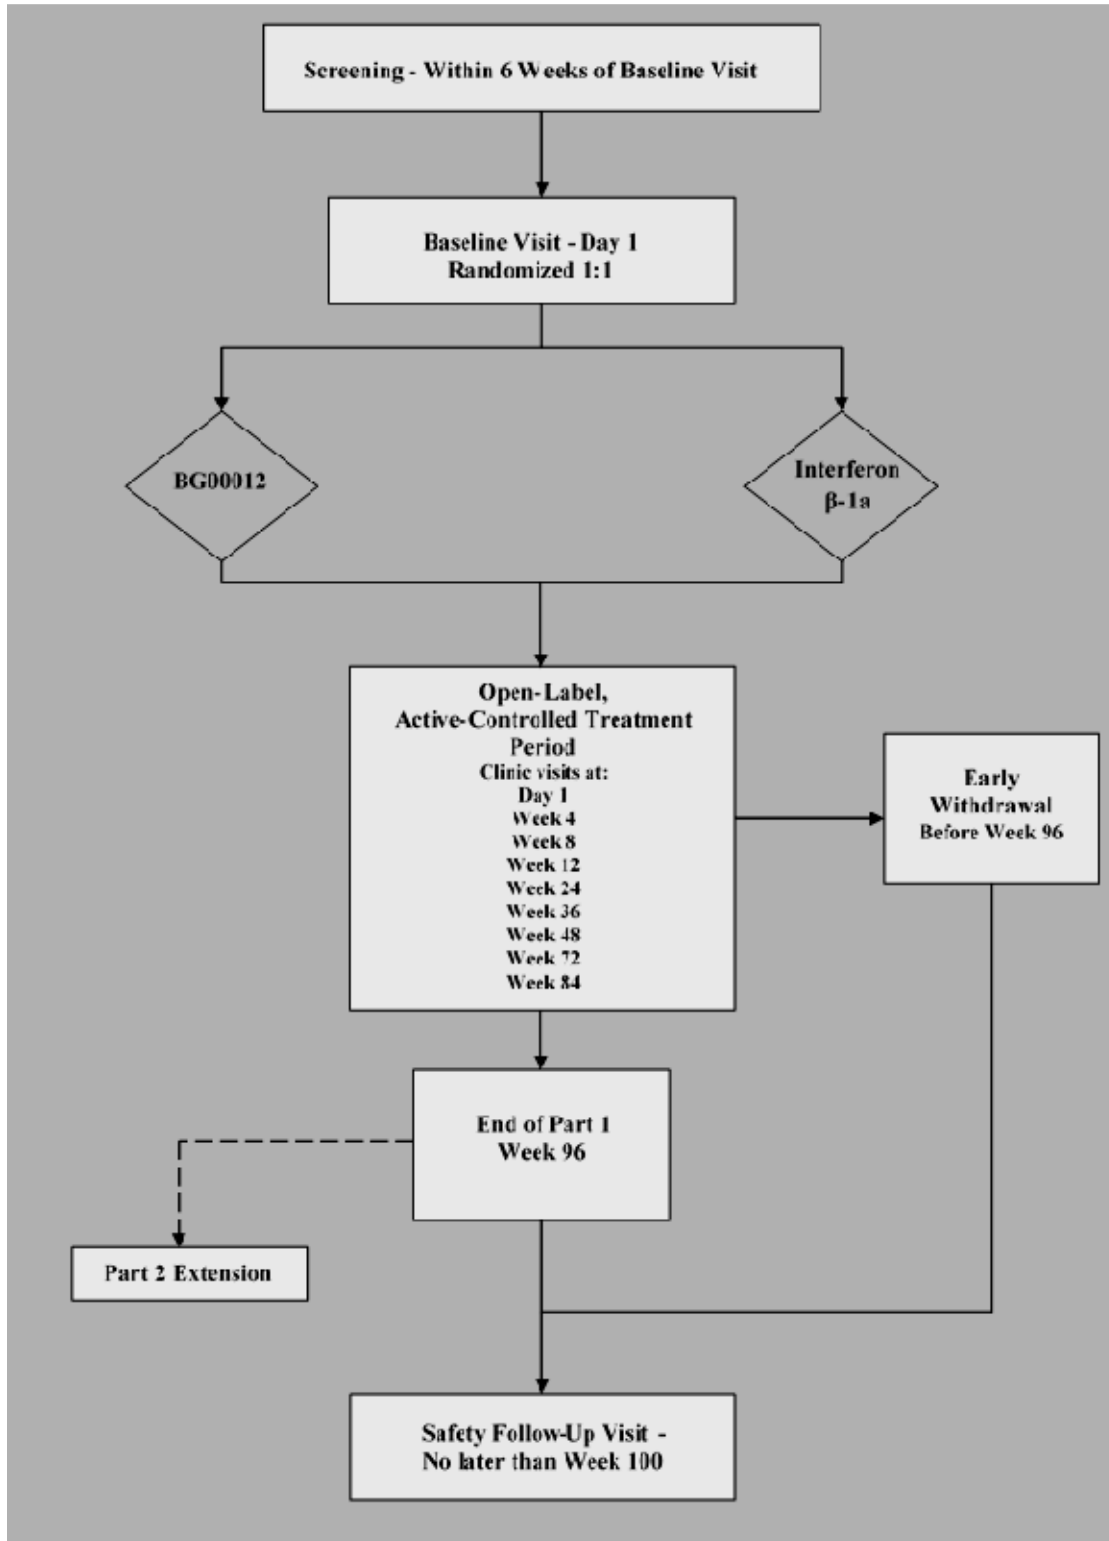

CONFIDENTIAL

The information contained herein may not be used, disclosed, or published without the written consent of Biogen MA Inc.

**Figure 2: Study Design - Part 2 Extension**

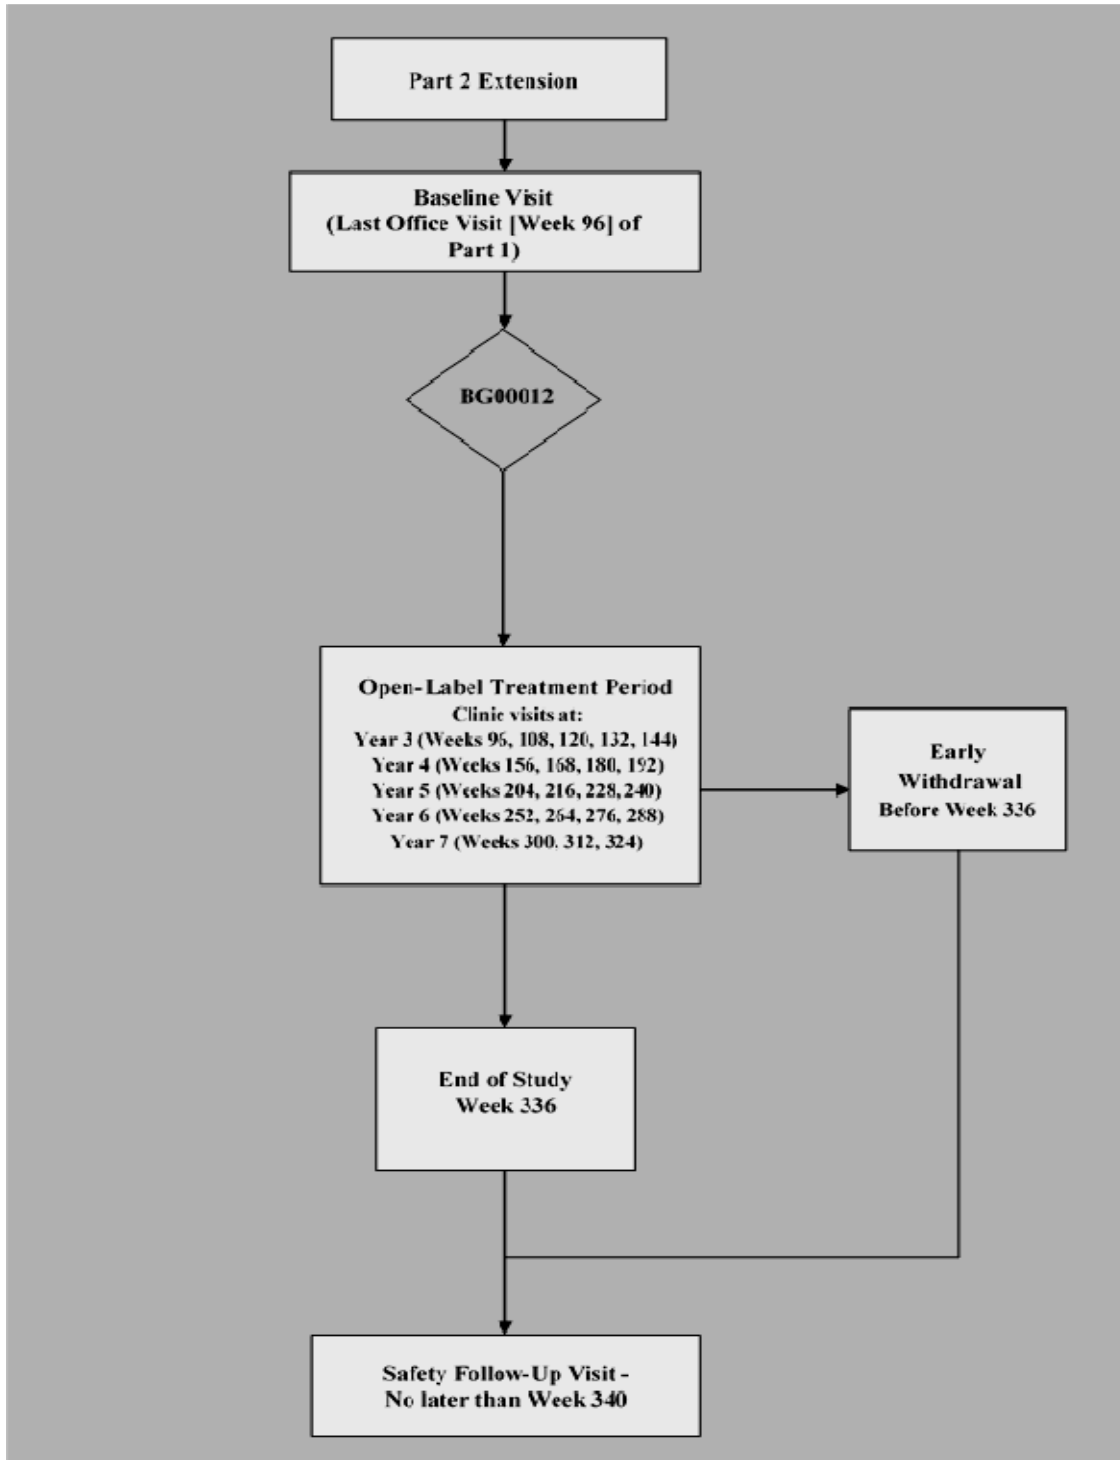

See [Figure 3](#) in Section 6.6.4.2 for the follow-up of subjects with lymphocyte count < lower limit of normal (LLN) who have permanently or temporarily discontinued BG00012 in Part 1.

CONFIDENTIAL

The information contained herein may not be used, disclosed, or published without the written consent of Biogen MA Inc.

## 4.2. Schedule of Events

**Table 1: Study Activities - Part 1**

| Tests and Assessments <sup>1</sup>      | Screening Visit              |                        |                                         |          |           |           |            |            |            |            |            |            |
|-----------------------------------------|------------------------------|------------------------|-----------------------------------------|----------|-----------|-----------|------------|------------|------------|------------|------------|------------|
|                                         | (Within 6 Weeks of Baseline) | Baseline Visit (Day 1) | Wk 2 ±5D Safety Phone Call <sup>2</sup> | Wk4 ± 5D | Wk 8 ± 5D | Wk 12 ±5D | Wk 24 ± 5D | Wk 36 ± 5D | Wk 48 ± 5D | Wk 60 ± 5D | Wk 72 ± 5D | Wk 84 ± 5D |
| Informed Consent or Assent <sup>3</sup> | X                            |                        |                                         |          |           |           |            |            |            |            |            |            |
| Eligibility Criteria                    | X                            | X                      |                                         |          |           |           |            |            |            |            |            |            |
| Medical History <sup>4</sup>            | X                            |                        |                                         |          |           |           |            |            |            |            |            |            |
| Hepatitis C Antibody and HBsAg Screen   | X                            |                        |                                         |          |           |           |            |            |            |            |            |            |
| Randomization                           |                              | X                      |                                         |          |           |           |            |            |            |            |            |            |
| Physical Examination                    | X                            | X                      |                                         |          |           |           | X          |            | X          |            | X          |            |
| Body Weight                             | X                            | X                      |                                         | X        | X         | X         | X          | X          | X          | X          | X          | X          |
| Height                                  | X                            |                        |                                         |          |           |           | X          |            | X          |            |            |            |
| Tanner Score <sup>5</sup>               | X                            |                        |                                         |          |           |           |            |            | X          |            |            |            |
| Vital Signs <sup>6</sup>                | X                            | X                      |                                         | X        | X         | X         | X          | X          | X          | X          | X          | X          |
| 12-Lead ECG                             | X                            | X <sup>7</sup>         |                                         | X        |           |           |            |            | X          |            |            |            |
| Hematology <sup>8</sup>                 | X                            | X                      |                                         | X        | X         | X         | X          | X          | X          | X          | X          | X          |
| Blood Chemistry                         | X                            | X                      |                                         | X        | X         | X         | X          | X          | X          | X          | X          | X          |
| PTT, PT, INR                            |                              | X                      |                                         |          |           |           | X          |            | X          |            |            |            |
| Urine Pregnancy Test <sup>9, 10</sup>   | X                            | X                      |                                         | X        | X         | X         | X          | X          | X          | X          | X          | X          |
| Urinalysis <sup>11</sup>                | X                            | X                      |                                         | X        | X         | X         | X          | X          | X          | X          | X          | X          |
| Endocrine Tests <sup>12</sup>           |                              | X                      |                                         |          |           |           |            |            | X          |            |            |            |

CONFIDENTIAL

The information contained herein may not be used, disclosed, or published without the written consent of Biogen MA Inc.

| Tests and Assessments <sup>1</sup>                            | Screening Visit              |                                                                     |                                                                     |          |           |           |            |            |            |            |            |            |
|---------------------------------------------------------------|------------------------------|---------------------------------------------------------------------|---------------------------------------------------------------------|----------|-----------|-----------|------------|------------|------------|------------|------------|------------|
|                                                               | (Within 6 Weeks of Baseline) | Baseline Visit (Day 1)                                              | Wk 2 ±5D Safety Phone Call <sup>2</sup>                             | Wk4 ± 5D | Wk 8 ± 5D | Wk 12 ±5D | Wk 24 ± 5D | Wk 36 ± 5D | Wk 48 ± 5D | Wk 60 ± 5D | Wk 72 ± 5D | Wk 84 ± 5D |
| EDSS                                                          | X                            | X                                                                   |                                                                     |          |           | X         | X          | X          | X          | X          | X          | X          |
| Brain MRI Scan ± Gd <sup>13, 14</sup>                         |                              | X                                                                   |                                                                     |          |           |           | X          |            | X          |            | X          |            |
| Hand and Wrist X-ray <sup>15</sup>                            |                              | X                                                                   |                                                                     |          |           |           |            |            | X          |            |            |            |
| PedsQL, PedsQL Multidimensional Fatigue Scale                 |                              | X                                                                   |                                                                     |          |           |           | X          |            | X          |            | X          |            |
| BVMT-R                                                        |                              | X                                                                   |                                                                     |          |           |           |            |            | X          |            |            |            |
| SDMT                                                          |                              | X                                                                   |                                                                     |          |           |           |            |            | X          |            |            |            |
| Query Regarding Annual School/Grade Progression <sup>16</sup> |                              | X                                                                   |                                                                     |          |           |           |            |            | X          |            |            |            |
| Dispense Treatment                                            |                              | X <sup>1</sup>                                                      |                                                                     | X        | X         | X         | X          | X          | X          | X          | X          | X          |
| Concomitant Therapy and Procedures                            |                              |                                                                     | X                                                                   |          |           |           |            |            |            |            |            |            |
| SAEs Recording                                                |                              | Monitor and record throughout the study as described in Section 8.2 |                                                                     |          |           |           |            |            |            |            |            |            |
| AEs Recording                                                 |                              |                                                                     | Monitor and record throughout the study as described in Section 8.2 |          |           |           |            |            |            |            |            |            |

AE = adverse event; BVMT-R = Brief Visuospatial Memory Test - Revised; D = days; ECG = electrocardiogram; EDSS = Expanded Disability Status Scale; FSH = follicle-stimulating hormone; Gd = gadolinium; HBsAg = hepatitis B surface antigen; INR = international normalized ratio; LH = luteinizing hormone; LLN = lower limit of normal; MRI = magnetic resonance imaging; MS = multiple sclerosis; PedsQL = Pediatric Quality of Life Inventory; PT = prothrombin time; PTT = partial thromboplastin time; SAE = serious adverse event; SDMT = Symbol Digit Modalities Test; Wk = week.

Note: Study visits (weeks) are calculated relative to Baseline (Day 1).

<sup>1</sup> All tests and evaluations are to be performed before dispensing initial study treatment.

<sup>2</sup> At Week 2 ± 5D, subjects will receive a safety telephone call from the study site staff.

<sup>3</sup> Written informed consent from the subject's parents or legal guardians and assent from the subject, if appropriate, must be obtained prior to performing any study-related procedures.

<sup>4</sup> Medical history will include complete MS history of disease (including pubertal status at the onset of disease), MS diagnostic criteria, MS signs and symptoms, and MS treatment history.

<sup>5</sup> Assessment of Tanner stages should be performed by a medical doctor experienced with this assessment. Information regarding Tanner staging will be collected at baseline for all male subjects and for female subjects who are premenarche and will be stopped once the subject's bone age reaches ≥16 years or once the subject is postmenarche.

CONFIDENTIAL

The information contained herein may not be used, disclosed, or published without the written consent of Biogen MA Inc.

- <sup>6</sup> Subjects will have their body temperature, heart rate, respiratory rate, and diastolic and systolic blood pressure measured. Subjects must remain in the same body position for 5 minutes prior to having heart rate and blood pressure taken.
- <sup>7</sup> Performed before dosing at this visit.
- <sup>8</sup> Lymphocyte counts must be tested every 4 weeks in subjects with lymphocyte count <LLN. See Lymphocyte Follow-Up Visit in [Table 2](#).
- <sup>9</sup> For females of childbearing potential. Results must be known prior to dispensing study treatment.
- <sup>10</sup> All urine pregnancy testing will be performed at the study site.
- <sup>11</sup> Urine cytology must be performed if microscopic hematuria of unknown etiology is observed under either of the following conditions: a) hematuria is present on 2 consecutive tests, or b) hematuria is observed at the End of Study/Early Withdrawal/Safety Follow-Up Visit. If urine cytology is positive, the subject must permanently discontinue study treatment (see [Table 8](#)).
- <sup>12</sup> Endocrine parameters to be tested will include insulin-like growth factor 1, insulin-like growth factor binding protein, FSH, LH, and estradiol (E-2) for females and testosterone, FSH, and LH for males. All endocrine tests will be collected at baseline for all male subjects and for female subjects who are premenarche and will stop being collected once the subject's bone age reaches  $\geq 16$  years or once the subject is postmenarche.
- <sup>13</sup> MRI must not be performed within 30 days of receiving a course of steroids, with the exception of MRIs obtained for the purpose of relapse assessment.
- <sup>14</sup> MRI must be performed and reviewed within 14 days prior to or on Day 1 (Baseline Visit), and at Weeks  $24 \pm 14$  days,  $48 \pm 14$  days, and  $72 \pm 14$  days.
- <sup>15</sup> An x-ray of the left hand and wrist to determine bone age will be performed at baseline for all male subjects and for female subjects who are premenarche, if permitted by the local regulatory authority. Assessment of this x-ray for determination of bone age should be performed by a radiologist experienced with this assessment. For subsequent visits, once the bone age is determined to be  $\geq 16$  years of age or once the subject is postmenarche, no further bone x-rays are required.
- <sup>16</sup> If permitted by the local regulatory authority, subjects or caregivers will be posed the following question: "During the past year, did [you/the subject] progress from one [class/grade-level] to the next in school?"

CONFIDENTIAL

The information contained herein may not be used, disclosed, or published without the written consent of Biogen MA Inc.

**Table 2: Study Activities (Unscheduled and Post-Treatment Visits) - Part 1**

| Tests and Assessments <sup>1</sup>               | End of Part 1/<br>Baseline Part 2 Visit | Early Withdrawal Visit | Safety Follow-Up Visit <sup>2</sup> | Lymphocyte<br>Follow-Up Visit <sup>3</sup> | Unscheduled Relapse<br>Assessment Visit <sup>4</sup> |
|--------------------------------------------------|-----------------------------------------|------------------------|-------------------------------------|--------------------------------------------|------------------------------------------------------|
| Week                                             | Wk 96 ± 5D                              |                        | No Later Than Wk 100<br>± 5D        |                                            |                                                      |
| Informed Consent or Assent                       | X <sup>5</sup>                          |                        |                                     |                                            |                                                      |
| Physical Examination                             | X                                       | X                      | X                                   | X                                          | X                                                    |
| Body Weight                                      | X                                       | X                      | X                                   |                                            | X                                                    |
| Height                                           | X                                       | X                      | X                                   |                                            |                                                      |
| Tanner Score <sup>6</sup>                        | X                                       | X                      |                                     |                                            |                                                      |
| Vital Signs <sup>7</sup>                         | X                                       | X                      | X                                   | X                                          | X                                                    |
| 12-Lead ECG                                      | X                                       | X                      | X                                   |                                            |                                                      |
| Hematology <sup>8</sup>                          | X                                       | X                      | X                                   | X                                          | X                                                    |
| Blood Chemistry                                  | X                                       | X                      | X                                   |                                            | X                                                    |
| PTT, PT, INR                                     | X                                       | X                      |                                     |                                            |                                                      |
| Urine Pregnancy Test <sup>9, 10</sup>            | X                                       | X                      | X                                   |                                            | X                                                    |
| Urinalysis <sup>11</sup>                         | X                                       | X                      | X                                   |                                            | X                                                    |
| Endocrine Tests <sup>12</sup>                    | X                                       | X                      |                                     |                                            |                                                      |
| EDSS                                             | X                                       | X                      |                                     |                                            | X                                                    |
| Brain MRI Scan ± Gd <sup>13</sup>                | X                                       | X                      |                                     |                                            | X                                                    |
| Hand and Wrist X-ray <sup>14</sup>               | X                                       | X                      |                                     |                                            |                                                      |
| PedsQL, PedsQL Multidimensional<br>Fatigue Scale | X                                       | X                      |                                     |                                            | X                                                    |
| BVMT-R                                           | X                                       | X                      |                                     |                                            |                                                      |
| SDMT                                             | X                                       | X                      |                                     |                                            |                                                      |
| Dispense Treatment                               | X                                       |                        |                                     |                                            |                                                      |

CONFIDENTIAL

The information contained herein may not be used, disclosed, or published without the written consent of Biogen MA Inc.

| Tests and Assessments <sup>1</sup>                               | End of Part 1/<br>Baseline Part 2 Visit                             | Early Withdrawal Visit | Safety Follow-Up Visit <sup>2</sup> | Lymphocyte<br>Follow-Up Visit <sup>3</sup> | Unscheduled Relapse<br>Assessment Visit <sup>4</sup> |
|------------------------------------------------------------------|---------------------------------------------------------------------|------------------------|-------------------------------------|--------------------------------------------|------------------------------------------------------|
| Week                                                             | Wk 96 ± 5D                                                          |                        | No Later Than Wk 100<br>± 5D        |                                            |                                                      |
| Relapse Assessment                                               |                                                                     |                        |                                     |                                            | X                                                    |
| Query Regarding Annual<br>School/Grade Progression <sup>15</sup> | X                                                                   |                        |                                     |                                            |                                                      |
| Concomitant Therapy and Procedures                               | X                                                                   |                        |                                     | X                                          | X                                                    |
| SAEs Recording                                                   | Monitor and record throughout the study as described in Section 8.2 |                        |                                     | X                                          | X                                                    |
| AEs Recording                                                    | Monitor and record throughout the study as described in Section 8.2 |                        |                                     | X                                          | X                                                    |

AE = adverse event; BVMT-R = Brief Visuospatial Memory Test - Revised; D = days; ECG = electrocardiogram; EDSS = Expanded Disability Status Scale;

FSH = follicle-stimulating hormone; Gd = gadolinium; HBsAg = hepatitis B surface antigen; INR = international normalized ratio; LH = luteinizing hormone; LLN = lower limit of normal; MRI = magnetic resonance imaging; MS = multiple sclerosis; PedsQL = Pediatric Quality of Life Inventory; PT = prothrombin time; PTT = partial thromboplastin time; SAE = serious adverse event; SDMT = Symbol Digit Modalities Test; Wk = week.

Note: Study visits (weeks) are calculated relative to Baseline (Day 1).

<sup>1</sup> All tests and evaluations are to be performed before dispensing initial study treatment.

<sup>2</sup> The Safety Follow-Up Visit will be conducted for subjects who will not continue in the Part 2 and for those who withdraw prematurely.

<sup>3</sup> Subjects treated with BG00012 who complete, temporarily withhold, or permanently discontinue study treatment for any reason and have a lymphocyte count <LLN will be followed every 4 weeks for 24 weeks, then every 12 weeks (**or sooner, if clinically indicated or at the Investigator's discretion**) until the lymphocyte count is ≥LLN, for at least 48 weeks following BG00012 treatment discontinuation, or until initiation of another MS disease modifying therapy, whichever occurs first. Any subject treated with BG00012 in Part 1 with a lymphocyte count <LLN being followed at the Part 1 Week 96 Visit (including subjects who completed, are temporarily withholding, or permanently discontinued BG00012 treatment) will continue follow-up within Part 2 of the study.

<sup>4</sup> Unscheduled Relapse Assessment Visit (assessment by the *treating* neurologist) to be carried out as soon as possible and within 72 hours of suspected relapse. See Section 6.3.3 and Section 6.9.2 for further details.

<sup>5</sup> Written informed consent from the subject's parents or legal guardians and assent from the subject, if appropriate, must be obtained prior to performing any study-related procedures for Part 2.

<sup>6</sup> Assessment of Tanner stages should be performed by a medical doctor experienced with this assessment. Information regarding Tanner staging will be collected at baseline for all male subjects and for female subjects who are premenarche and will be stopped once the subject's bone age reaches ≥16 years or once the subject is postmenarche.

<sup>7</sup> Subjects will have their body temperature, heart rate, respiratory rate, and diastolic and systolic blood pressure measured. Subjects must remain in the same body position for 5 minutes prior to having heart rate and blood pressure taken.

<sup>8</sup> Lymphocyte counts must be tested every 4 weeks in subjects with lymphocyte count <LLN. See Lymphocyte Follow-Up Visit.

<sup>9</sup> For females of childbearing potential. Results must be known prior to dispensing study treatment.

<sup>10</sup> All urine pregnancy testing will be performed at the study site.

<sup>11</sup> Urine cytology must be performed if microscopic hematuria of unknown etiology is observed under either of the following conditions: a) hematuria is present on 2 consecutive tests, or b) hematuria is observed at the End of Study/Early Withdrawal/Safety Follow-Up Visit. If urine cytology is positive, the subject must permanently discontinue study treatment (see Table 8).

CONFIDENTIAL

The information contained herein may not be used, disclosed, or published without the written consent of Biogen MA Inc.



- <sup>12</sup> Endocrine parameters to be tested will include insulin-like growth factor 1, insulin-like growth factor binding protein, FSH, LH, and estradiol (E-2) for females and testosterone, FSH, and LH for males. All endocrine tests will be collected at baseline for all male subjects and for female subjects who are premenarche and will stop being collected once the subject's bone age reaches  $\geq 16$  years or once the subject is postmenarche.
- <sup>13</sup> MRI must not be performed within 30 days of receiving a course of steroids, with the exception of MRIs obtained for the purpose of relapse assessment.
- <sup>14</sup> An x-ray of the left hand and wrist to determine bone age will be performed at baseline for all male subjects and for female subjects who are premenarche, if permitted by the local regulatory authority. Assessment of this x-ray for determination of bone age should be performed by a radiologist experienced with this assessment. For subsequent visits, once the bone age is determined to be  $\geq 16$  years of age or once the subject is postmenarche, no further bone x-rays are required.
- <sup>15</sup> If permitted by the local regulatory authority, subjects or caregivers will be posed the following question: "During the past year, did [you/the subject] progress from one [class/grade-level] to the next in school?"

CONFIDENTIAL

The information contained herein may not be used, disclosed, or published without the written consent of Biogen MA Inc.

**Table 3: Study Activities - Part 2**

| Year                                          | Year 3            |                                                                   |     |     |     |     | Year 4 |     |     |     | Year 5 |     |     |     | Year 6 |     |     |     | Year 7 |     |     |
|-----------------------------------------------|-------------------|-------------------------------------------------------------------|-----|-----|-----|-----|--------|-----|-----|-----|--------|-----|-----|-----|--------|-----|-----|-----|--------|-----|-----|
| Study Week (±7 days)                          | 96 <sup>1,2</sup> | 98                                                                | 108 | 120 | 132 | 144 | 156    | 168 | 180 | 192 | 204    | 216 | 228 | 240 | 252    | 264 | 276 | 288 | 300    | 312 | 324 |
| Informed Consent and Assent <sup>3</sup>      | X                 |                                                                   |     |     |     |     |        |     |     |     |        |     |     |     |        |     |     |     |        |     |     |
| Eligibility Criteria                          | X                 |                                                                   |     |     |     |     |        |     |     |     |        |     |     |     |        |     |     |     |        |     |     |
| Dispense Treatment <sup>4</sup>               | X                 |                                                                   | X   | X   | X   | X   | X      | X   | X   | X   | X      | X   | X   | X   | X      | X   | X   | X   | X      | X   | X   |
| Physical Examination                          | X                 |                                                                   |     | X   |     | X   |        | X   |     | X   |        | X   |     | X   |        | X   |     | X   |        | X   |     |
| Body Weight                                   | X                 |                                                                   |     | X   |     | X   |        | X   |     | X   |        | X   |     | X   |        | X   |     | X   |        | X   |     |
| Height                                        | X                 |                                                                   |     | X   |     | X   |        | X   |     | X   |        | X   |     | X   |        | X   |     | X   |        | X   |     |
| Tanner Score <sup>5</sup>                     | X                 |                                                                   |     |     |     | X   |        |     |     | X   |        |     |     | X   |        |     |     | X   |        |     |     |
| Vital Signs <sup>6</sup>                      | X                 |                                                                   |     | X   |     | X   |        | X   |     | X   |        | X   |     | X   |        | X   |     | X   |        | X   |     |
| 12-Lead ECG                                   | X                 |                                                                   |     |     |     | X   |        |     |     | X   |        |     |     | X   |        |     |     | X   |        |     |     |
| Hematology <sup>7</sup>                       | X                 |                                                                   | X   | X   | X   | X   | X      | X   | X   | X   | X      | X   | X   | X   | X      | X   | X   | X   | X      | X   | X   |
| Blood Chemistry                               | X                 |                                                                   |     | X   |     | X   |        | X   |     | X   |        | X   |     | X   |        | X   |     | X   |        | X   |     |
| Urinalysis <sup>8</sup>                       | X                 |                                                                   | X   | X   | X   | X   | X      | X   | X   | X   | X      | X   | X   | X   | X      | X   | X   | X   | X      | X   | X   |
| Urine Pregnancy Test <sup>9,10</sup>          | X                 |                                                                   | X   | X   | X   | X   | X      | X   | X   | X   | X      | X   | X   | X   | X      | X   | X   | X   | X      | X   | X   |
| Endocrine Tests <sup>11</sup>                 | X                 |                                                                   |     |     |     | X   |        |     |     | X   |        |     |     | X   |        |     |     | X   |        |     |     |
| Hand and Wrist X-ray <sup>12</sup>            | X                 |                                                                   |     |     |     | X   |        |     |     | X   |        |     |     | X   |        |     |     | X   |        |     |     |
| EDSS                                          | X                 |                                                                   |     |     |     | X   |        |     |     | X   |        |     |     | X   |        |     |     | X   |        |     |     |
| Brain MRI Scan ± Gd                           |                   | MRIs may be obtained as per local guidelines and reviewed locally |     |     |     |     |        |     |     |     |        |     |     |     |        |     |     |     |        |     |     |
| PedsQL, PedsQL Multidimensional Fatigue Scale | X                 |                                                                   |     |     |     | X   |        |     |     | X   |        |     |     | X   |        |     |     | X   |        |     |     |
| BVMT-R                                        | X                 |                                                                   |     |     |     | X   |        |     |     | X   |        |     |     | X   |        |     |     | X   |        |     |     |
| SDMT                                          | X                 |                                                                   |     |     |     | X   |        |     |     | X   |        |     |     | X   |        |     |     | X   |        |     |     |

CONFIDENTIAL

The information contained herein may not be used, disclosed, or published without the written consent of Biogen MA Inc.

| Year                                                          | Year 3                                  |    |     |     |     |     | Year 4 |     |     |     | Year 5 |     |     |     | Year 6 |     |     |     | Year 7 |     |     |
|---------------------------------------------------------------|-----------------------------------------|----|-----|-----|-----|-----|--------|-----|-----|-----|--------|-----|-----|-----|--------|-----|-----|-----|--------|-----|-----|
| Study Week (±7 days)                                          | 96 <sup>1,2</sup>                       | 98 | 108 | 120 | 132 | 144 | 156    | 168 | 180 | 192 | 204    | 216 | 228 | 240 | 252    | 264 | 276 | 288 | 300    | 312 | 324 |
| Query Regarding Annual School/Grade Progression <sup>13</sup> | X                                       |    |     |     |     | X   |        |     |     | X   |        |     |     | X   |        |     |     | X   |        |     |     |
| Relapse Assessment                                            | Monitor and record throughout the study |    |     |     |     |     |        |     |     |     |        |     |     |     |        |     |     |     |        |     |     |
| Concomitant Therapy                                           | Monitor and record throughout the study |    |     |     |     |     |        |     |     |     |        |     |     |     |        |     |     |     |        |     |     |
| AEs Recording                                                 | Monitor and record throughout the study |    |     |     |     |     |        |     |     |     |        |     |     |     |        |     |     |     |        |     |     |

AE = adverse event; BVMT-R = Brief Visuospatial Memory Test - Revised; ECG = electrocardiogram; EDSS = Expanded Disability Status Scale; FSH = follicle-stimulating hormone; Gd = gadolinium; LH = luteinizing hormone; MRI = magnetic resonance imaging; PedsQL = Pediatric Quality of Life Inventory; SDMT = Symbol Digit Modalities Test; WBC = white blood cell.

Note: Subjects who have discontinued BG00012 in Part 1 and are participating in Part 2 for follow-up lymphocyte monitoring will not be required to undergo study procedures other than the monitoring of lymphocytes and relevant safety assessments (i.e., AE collection, vital signs, and physical examination). These subjects are required to have lymphocytes monitored in accordance with the schedule outlined in Table 9, but are not required to undergo any additional routine study assessments. All other assessments are optional for this subset of subjects. These subjects will be followed in Part 2 every 4 weeks for the 24 weeks following the discontinuation of BG00012, then every 12 weeks (or sooner, if clinically indicated or at the Investigator's discretion) until the lymphocyte count is >LLN, for at least 48 weeks following BG00012 discontinuation, or until initiation of another MS disease modifying therapy, whichever occurs first.

- <sup>1</sup> Eligible subjects from Part 1 who consent to participate in Part 2 will be enrolled at the Part 1 Week 96 Visit; this will serve as the Baseline Visit for Part 2. Of note, Week 84 laboratory results may be used to confirm a subject's eligibility to participate in Part 2. Before entering Part 2, every examination and evaluation for Part 1 should be completed, with the following exception. Any subject treated with BG00012 in Part 1 with a lymphocyte count <LLN being followed at the Part 1 Week 96 Visit (including subjects who completed, are temporarily withholding, or permanently discontinued BG00012 treatment) will continue follow-up within Part 2 of the study. If the Final Study Visit for Part 1 cannot be combined with the Baseline/Screening Visit for Part 2, the Baseline/Screening Visit for Part 2 must be done within 4 weeks of the Final Study Visit in Part 1; however, no tests need to be repeated.
- <sup>2</sup> Subjects who were randomized to receive IFN β-1a (Avonex) in Part 1 of the study will receive a starting dose of BG00012, 120 mg BID, orally, for 7 days followed by the maintenance dose of BG00012 240 mg BID, orally, for the remainder of the study. These subjects will also receive a safety telephone call from the study site staff 2 weeks ±5D after initiating BG00012.
- <sup>3</sup> Written informed consent from the subject's parents or legal guardians and assent from the subject, if appropriate, must be obtained prior to performing any study-related procedures.
- <sup>4</sup> All tests and evaluations are to be performed before dispensing initial study treatment.
- <sup>5</sup> Assessment of Tanner stages should be performed by a medical doctor experienced with this assessment. Information regarding Tanner staging will be collected at baseline for all male subjects and for female subjects who are premenarche and will be stopped once the subject's bone age reaches ≥16 years or once subject is postmenarche.
- <sup>6</sup> Subjects will have their body temperature, heart rate, respiratory rate, and diastolic and systolic blood pressure measured. Subjects must remain in the same body position for 5 minutes prior to having heart rate and blood pressure taken.
- <sup>7</sup> Lymphocyte counts must be tested every 4 weeks in subjects with lymphocyte count <LLN. See Lymphocyte Follow-Up Visit in Table 4.
- <sup>8</sup> Urine cytology must be performed if microscopic hematuria of unknown etiology is observed under either of the following conditions: a) hematuria is present on 2 consecutive tests, or b) hematuria is observed at the End of Study/Early Withdrawal/Safety Follow-Up Visit. If urine cytology is positive, the subject must permanently discontinue study treatment (see Table 8).
- <sup>9</sup> For females of childbearing potential. Results must be known prior to dispensing study treatment.
- <sup>10</sup> All urine pregnancy testing will be performed at the study site.

CONFIDENTIAL

The information contained herein may not be used, disclosed, or published without the written consent of Biogen MA Inc.

- <sup>11</sup> Endocrine parameters to be tested will include insulin-like growth factor 1; insulin-like growth factor binding protein; FSH, LH, and estradiol (E-2) for females and testosterone, FSH, and LH for males. All endocrine tests will be collected at baseline for all male subjects and for female subjects who are premenarche and will stop being collected once the subject's bone age reaches  $\geq 16$  years or once the subject is postmenarche.
- <sup>12</sup> An x-ray of the left hand and wrist to determine bone age will be performed at baseline for all male subjects and for female subjects who are premenarche, if permitted by the local regulatory authority. Assessment of this x-ray for determination of bone age should be performed by a radiologist experienced with this assessment. For subsequent visits, once the bone age is determined to be  $\geq 16$  years of age or once the subject is postmenarche, no further bone x-rays are required.
- <sup>13</sup> If permitted by the local regulatory authority, subjects or caregivers will be posed the following question: "During the past year, did [you/the subject] progress from one [class/grade-level] to the next in school?"

CONFIDENTIAL

The information contained herein may not be used, disclosed, or published without the written consent of Biogen MA Inc.

**Table 4: Study Activities (Unscheduled and Post-Treatment Visits) - Part 2**

| Tests and Assessments <sup>1</sup>                            | End of Study Visit/Early Withdrawal (Week 336 ± 7 days)             | Safety Follow-Up Visit (No Later Than Week 340) <sup>2</sup> | Lymphocyte Follow-Up <sup>3</sup> | Unscheduled Relapse Assessment Visit <sup>4</sup> |
|---------------------------------------------------------------|---------------------------------------------------------------------|--------------------------------------------------------------|-----------------------------------|---------------------------------------------------|
| Physical Examination                                          | X                                                                   | X                                                            | X                                 | X                                                 |
| Body Weight                                                   | X                                                                   | X                                                            |                                   | X                                                 |
| Height                                                        | X                                                                   | X                                                            |                                   |                                                   |
| Tanner Score <sup>5</sup>                                     | X                                                                   |                                                              |                                   |                                                   |
| Vital Signs <sup>6</sup>                                      | X                                                                   | X                                                            | X                                 | X                                                 |
| 12-Lead ECG                                                   | X                                                                   | X                                                            |                                   |                                                   |
| Hematology <sup>7</sup>                                       | X                                                                   | X                                                            | X                                 | X                                                 |
| Blood Chemistry                                               | X                                                                   | X                                                            |                                   | X                                                 |
| Urinalysis <sup>8</sup>                                       | X                                                                   | X                                                            |                                   | X                                                 |
| Urine Pregnancy Test <sup>9</sup>                             | X                                                                   | X                                                            |                                   | X                                                 |
| Endocrine Tests <sup>10</sup>                                 | X                                                                   |                                                              |                                   |                                                   |
| EDSS                                                          | X                                                                   |                                                              |                                   | X                                                 |
| Hand and Wrist X-ray <sup>11</sup>                            | X                                                                   |                                                              |                                   |                                                   |
| Brain MRI Scan ± Gd <sup>12</sup>                             |                                                                     |                                                              |                                   | X                                                 |
| PedsQL, PedsQL Multidimensional Fatigue Scale                 | X                                                                   |                                                              |                                   | X                                                 |
| BVMT-R                                                        | X                                                                   |                                                              |                                   |                                                   |
| SDMT                                                          | X                                                                   |                                                              |                                   |                                                   |
| Query Regarding Annual School/Grade Progression <sup>13</sup> | X                                                                   |                                                              |                                   |                                                   |
| Relapse Assessment                                            |                                                                     |                                                              |                                   | X                                                 |
| Concomitant Therapy and Procedures Recording                  | X                                                                   |                                                              |                                   |                                                   |
| AE/SAE Reporting                                              | Monitor and record throughout the study as described in Section 8.2 |                                                              |                                   |                                                   |

CONFIDENTIAL

The information contained herein may not be used, disclosed, or published without the written consent of Biogen MA Inc.

AE = adverse event; BVMT-R = Brief Visuospatial Memory Test - Revised; ECG = electrocardiogram; EDSS = Expanded Disability Status Scale; FSH = follicle-stimulating hormone; Gd = gadolinium; LH = luteinizing hormone; LLN = lower limit of normal; MRI = magnetic resonance imaging; PedsQL = Pediatric Quality of Life Inventory; SAE = serious adverse event; SDMT = Symbol Digit Modalities Test.

<sup>1</sup> All tests and evaluations are to be performed before dispensing initial study treatment.

<sup>2</sup> The Safety Follow-Up Visit will be conducted no later than 4 weeks after the last dose of study treatment for subjects who will complete Part 2 and for those who withdraw prematurely.

<sup>3</sup> Subjects treated with BG00012 who complete, temporarily withhold, or permanently discontinue study treatment for any reason and have a lymphocyte count <LLN will be followed every 4 weeks for 24 weeks, then every 12 weeks (**or sooner, if clinically indicated or at the Investigator's discretion**) until the lymphocyte count is  $\geq$ LLN, for at least 48 weeks following BG00012 treatment discontinuation, or until initiation of another MS disease modifying therapy, whichever occurs first. Any subject treated with BG00012 in Part 1 with a lymphocyte count <LLN being followed at the Part 1 Week 96 Visit (including subjects who completed, are temporarily withholding, or permanently discontinued BG00012 treatment) will continue follow-up within Part 2 of the study.

<sup>4</sup> Unscheduled Relapse Assessment Visit (assessment by the *treating* neurologist) to be carried out as soon as possible and within 72 hours of suspected relapse. See Section 6.3.3 and Section 6.9.2 for further details.

<sup>5</sup> Assessment of Tanner stages should be performed by a medical doctor experienced with this assessment. Information regarding Tanner staging will be collected at baseline for all male subjects and for female subjects who are premenarche and will be stopped once the subject's bone age reaches  $\geq$ 16 years or once the subject is postmenarche.

<sup>6</sup> Subjects will have their body temperature, heart rate, respiratory rate, and diastolic and systolic blood pressure measured. Subjects must remain in the same body position for 5 minutes prior to having heart rate and blood pressure taken.

<sup>7</sup> Lymphocyte counts must be tested every 4 weeks in subjects with lymphocyte count <LLN. See Lymphocyte Follow-Up Visit.

<sup>8</sup> Urine cytology must be performed if microscopic hematuria of unknown etiology is observed under either of the following conditions: a) hematuria is present on 2 consecutive tests, or b) hematuria is observed at the End of Study/Early Withdrawal/Safety Follow-Up Visit. If urine cytology is positive, the subject must permanently discontinue study treatment (see Table 8).

<sup>9</sup> All urine pregnancy testing will be performed at the study site.

<sup>10</sup> Endocrine parameters to be tested will include insulin-like growth factor 1, insulin-like growth factor binding protein, FSH, LH, and estradiol (E-2) for females and testosterone, FSH, and LH for males. All endocrine tests will be collected at baseline for all male subjects and for female subjects who are premenarche and will stop being collected once the subject's bone age reaches  $\geq$ 16 years or once the subject is postmenarche.

<sup>11</sup> An x-ray of the left hand and wrist to determine bone age will be performed at baseline for all male subjects and for female subjects who are premenarche, if permitted by the local regulatory authority. Assessment of this x-ray for determination of bone age should be performed by a radiologist experienced with this assessment. For subsequent visits, once the bone age is determined to be  $\geq$ 16 years of age or once the subject is postmenarche, no further bone x-rays are required.

<sup>12</sup> Brain MRI scan will be reviewed locally.

<sup>13</sup> If permitted by the local regulatory authority, subjects or caregivers will be posed the following question: "During the past year, did [you/the subject] progress from one [class/grade-level] to the next in school?"

CONFIDENTIAL

The information contained herein may not be used, disclosed, or published without the written consent of Biogen MA Inc.

### 4.3. Additional Information

Subjects in the BG00012 treatment group can either swallow the BG00012 capsules whole (preferred) or open the capsules and mix with food **immediately** prior to consumption.

#### 4.3.1. Blood Volumes

Every effort was made to collect the minimum blood volume needed per protocol assessment. The blood volumes required for this study do not exceed the recommended pediatric blood volume limits for sampling, i.e., volumes do not exceed 3% of the total blood volumes during a period of 4 weeks and volumes do not exceed 1% at any single visit [[European Commission 2008](#)]. For example, in a 30-kg child (the lowest possible weight permitted in this study), it was estimated that 1% of the total volume would be approximately 21 mL. Children weighing more than 30 kg would have higher permitted amounts. The total blood volumes drawn at each visit are provided in [Table 5](#), [Table 6](#), and [Table 7](#).

CONFIDENTIAL

The information contained herein may not be used, disclosed, or published without the written consent of Biogen MA Inc.

**Table 5: Blood Volumes by Visit - Part 1**

|                           | Screening Visit                    |                              |                                        |             |                 |                 |                     |                  |                  |                  |                  |                  | End of Study/<br>Early<br>Withdrawal | Safety<br>Follow-Up<br>Visit       | Lymphocyte<br>Follow-Up<br>Visit | Unscheduled<br>Relapse<br>Assessment<br>Visit |
|---------------------------|------------------------------------|------------------------------|----------------------------------------|-------------|-----------------|-----------------|---------------------|------------------|------------------|------------------|------------------|------------------|--------------------------------------|------------------------------------|----------------------------------|-----------------------------------------------|
| Week                      | (Within 6<br>Weeks of<br>Baseline) | Baseline<br>Visit<br>(Day 1) | Wk 2<br>±5D<br>Safety<br>Phone<br>Call | Wk4<br>± 5D | Wk<br>8 ±<br>5D | Wk<br>12<br>±5D | Wk<br>24<br>±<br>5D | Wk<br>36 ±<br>5D | Wk<br>48 ±<br>5D | Wk<br>60 ±<br>5D | Wk<br>72 ±<br>5D | Wk<br>84 ±<br>5D | Wk<br>96<br>± 5D                     | No later<br>Than<br>Wk 100<br>± 5D |                                  |                                               |
| Blood Draw<br>Volume (mL) | 4.8                                | 12.9                         | 0.0                                    | 2.5         | 2.5             | 2.5             | 4.0                 | 2.5              | 9.0              | 2.5              | 2.5              | 2.5              | 12.9                                 | 2.3                                | 1.2                              | 2.3                                           |

Wk = week.

**Table 6: Blood Volumes by Visit - Part 2 Treatment Period**

|                                 | Year 3    |           |           | Year 4    |           |           |           | Year 5    |           |           |           | Year 6    |           |           |           | Year 7    |           |           |           |
|---------------------------------|-----------|-----------|-----------|-----------|-----------|-----------|-----------|-----------|-----------|-----------|-----------|-----------|-----------|-----------|-----------|-----------|-----------|-----------|-----------|
|                                 | Wk<br>108 | Wk<br>120 | Wk<br>132 | Wk<br>144 | Wk<br>156 | Wk<br>168 | Wk<br>180 | Wk<br>192 | Wk<br>204 | Wk<br>216 | Wk<br>228 | Wk<br>240 | Wk<br>252 | Wk<br>264 | Wk<br>276 | Wk<br>288 | Wk<br>300 | Wk<br>312 | Wk<br>324 |
| Blood<br>Draw<br>Volume<br>(mL) | 1.2       | 2.3       | 1.2       | 11.5      | 1.2       | 2.3       | 1.2       | 11.5      | 1.2       | 2.3       | 1.2       | 11.5      | 1.2       | 2.3       | 1.2       | 11.5      | 1.2       | 2.3       | 1.2       |

Wk = week.

**Table 7: Blood Volumes for Unscheduled and Post-Treatment Visits for Part 2**

|                        | End of Study Visit/Early<br>Withdrawal<br>(Week 336 ± 7 days) | Safety Follow-Up Visit<br>(no later than Week 340) | Lymphocyte Follow-Up | Unscheduled Relapse<br>Assessment Visit |
|------------------------|---------------------------------------------------------------|----------------------------------------------------|----------------------|-----------------------------------------|
| Blood Draw Volume (mL) | 11.5                                                          | 2.3                                                | 1.2                  | 2.3                                     |

CONFIDENTIAL

The information contained herein may not be used, disclosed, or published without the written consent of Biogen MA Inc.



#### 4.3.2. Site Personnel

For each subject, the Principal Investigator of the site will designate the following investigational site personnel:

- A primary and backup *treating* neurologist
- A primary and backup *treating* nurse or study coordinator
- A primary and backup *examining* neurologist
- A magnetic resonance imaging (MRI) technician
- A radiologist
- A pharmacist (or authorized designee)

Where specified, evaluations described in this section must be performed only by the personnel indicated.

The primary *treating* neurologist will be responsible for the following activities:

- Management of the routine neurological care of the subject
- Assessment (including assignment of causality) and treatment of adverse events (AEs) and multiple sclerosis (MS) relapses
- Review of selected hematology and blood chemistry results from the central laboratory to assess whether the subject's study treatment should be temporarily withheld or permanently discontinued as per the criteria detailed in Section 6.6.3 and Section 6.6.4.

The *treating* neurologist may designate other medical personnel (i.e., the backup *treating* neurologist or the *treating* nurse) at the investigational site to perform some of the tests and evaluations listed under "*treating* neurologist." If there is more than 1 *treating* neurologist available at a given site such that each is assigned to particular subjects, then these *treating* neurologists may act as backup for each other. The same holds true for the *treating* nurses.

Hematology, blood chemistry, and urinalysis data will be sent to the investigational sites to aid in management of the subject. As with other laboratory and clinical information, these data should NOT be reviewed by the *examining* neurologist or the backup *examining* neurologist.

CONFIDENTIAL

The information contained herein may not be used, disclosed, or published without the written consent of Biogen MA Inc.

The primary *treating* nurse or study coordinator will be responsible for the following activities:

- Assisting the *treating* neurologist in subject management, including the treatment of AEs, the treatment and assessment of disease relapses, and the recording of AEs and concomitant medications.
- Obtaining Brief Visuospatial Memory Test - Revised (BVRT-R) score, Symbol Digit Modalities Test (SDMT) score, Pediatric Quality of Life Inventory (PedsQL™) score, a PedsQL Multidimensional Fatigue Scale score, and school progression query at the scheduled timepoints required in the protocol.
- Monitoring accountability of study treatment at subject level.

The *examining* neurologist or EDSS-certified rater will be responsible for the following activities:

- Obtaining an Expanded Disability Status Scale (EDSS) score based on a detailed neurological examination at the scheduled timepoints required in the protocol
- Obtaining an EDSS score each time a subject is referred by the *treating* neurologist, based on the *treating* neurologist's assessment of a possible relapse at the unscheduled Relapse Assessment Visit.
- The *examining* neurologist must not be involved with any other aspect of subject care and management. Further, the *examining* neurologist is not to serve as *treating* neurologist for any subjects at a given investigational site. To ensure consistency across sites, *examining* neurologists must undergo a standardized training session on EDSS scoring prior to enrollment of subjects at their site. The backup *examining* neurologist will conduct subject evaluations ONLY if the primary *examining* neurologist is unavailable due to illness, vacation, or travel. All sites should attempt to maintain the same *examining* neurologist throughout the study. If an *examining* neurologist has to be replaced, the new *examining* neurologist must undergo a training session. The communication of new findings on the neurologic examination from the *examining* neurologist to the *treating* neurologist is permitted (because findings on the neurologic examination may be important in the routine care of the subject, e.g., medical management of relapses). The roles of *treating* and *examining* neurologist (primary and backup) are NOT interchangeable even for different subjects. The *examining* neurologist must remain blinded to AEs, concomitant medications, laboratory data, MRI scan data, and any other data that have the potential of revealing the treatment assignment.

The MRI technician will be responsible for performing a brain MRI scan with and without gadolinium (Gd) at all protocol-required timepoints. Study-specific MRI scan procedures and protocols with and without Gd, which will be provided prior to study start, must be followed in

CONFIDENTIAL

The information contained herein may not be used, disclosed, or published without the written consent of Biogen MA Inc.

Part 1. Subjects should be offered the use of topical anesthetics for venipuncture, and an intravenous (IV)-line insertion must be performed for injection of Gd.

The radiologist will be responsible for and should be experienced with the assessment of hand and wrist x-rays for the determination of bone age.

The pharmacist (or authorized designee) will be responsible for storage, distribution, and site accountability of study treatment.

CONFIDENTIAL

The information contained herein may not be used, disclosed, or published without the written consent of Biogen MA Inc.

## 5. INTRODUCTION

MS is a chronic autoimmune and neurodegenerative disorder of the central nervous system (CNS) that is characterized by inflammation, demyelination, and oligodendrocyte and neuronal loss. It is the most common demyelinating disorder of the CNS, affecting approximately 2.5 million people worldwide, and it typically affects young to middle-aged adults. Although not usually reported in pediatric patients, 2.2% to 4.4% of all MS cases are in pediatric patients [Chitnis 2011]. Girls are affected more than boys, and most cases are relapsing-remitting multiple sclerosis (RRMS).

### 5.1. Profile of Previous Experience

#### 5.1.1. Preclinical Experience With BG00012

Nonclinical safety studies were performed to support the development of BG00012 for the treatment of MS. CNS, respiratory, and cardiovascular safety studies demonstrated no drug-related adverse effects on those systems, which is consistent with human data. There were no findings of mutagenicity, fertility, and teratogenicity. Repeat-dose toxicology studies were performed in rodents (mouse and rat) and non-rodents (dog and monkey). The findings in the liver, forestomach, and testis were concluded to be of limited concern to human risk. In the male rat juvenile toxicology study that specifically evaluated the reproductive organs, there were no toxicology findings. Kidney findings seen in animals were not observed in humans. In life-time carcinogenicity studies, renal tumors were attributed to a rodent-specific event of the exacerbation of nephropathy.

An overview of preclinical data with BG00012 is provided in the Investigator's Brochure.

#### 5.1.2. Relevant Clinical Experience With BG00012

BG00012 240 mg twice daily (BID) is currently approved for the treatment of adult patients with MS in the United States (US) and other countries.

The efficacy and safety of BG00012 are well established based on data from the clinical development program for BG00012 in MS that included 6 clinical studies that were conducted in subjects with RRMS. A total 2665 subjects with MS received at least 1 dose of BG00012. Of these, 2513 subjects with MS received BG00012 in the Phase 2 and 3 placebo-controlled efficacy and safety studies and/or their uncontrolled extension studies accounting for approximately 6100 subject-years of exposure. Of the 2513 subjects 1606 received BG00012 at a dose of 240 mg BID or higher for  $\geq 2$  years, 1075 for  $\geq 3$  years, 872 for  $\geq 4$  years, and 303 for  $\geq 5$  years. The maximum duration of exposure to BG00012 for any subject with MS was 6.5 years.

CONFIDENTIAL

The information contained herein may not be used, disclosed, or published without the written consent of Biogen MA Inc.

The efficacy of BG00012 on MS in adults was assessed in Study C-1900, a Phase 2, randomized, placebo-controlled study in subjects with RRMS, 2 Phase 3 studies (Study 109MS301 [DEFINE] and Study 109MS302 [CONFIRM]) in subjects with RRMS, and in an ongoing Phase 3 extension study (Study 109MS303).

Results of Phase 3 clinical studies demonstrate that BG00012 given as 240 mg BID or 3 times daily (TID) is an efficacious treatment for RRMS. Consistent and substantial evidence of clinical efficacy has been shown by significant reductions in measurements of relapse and disability progression versus placebo. Clinical efficacy was supported by positive and consistent effects on MRI measures of disease activity. A robust treatment effect was evident within the initial 6 months of treatment and was sustained for up to 2 years of treatment.

Overall, safety data from the clinical development program showed that BG00012 was well tolerated and has an acceptable safety profile. In the BG00012 BID group, the most common AEs (incidence  $\geq 5\%$ ) that also occurred at an incidence of  $\geq 2\%$  higher than in the placebo group were flushing and hot flush, gastrointestinal (GI) events (diarrhea, nausea, abdominal pain upper, abdominal pain, vomiting, and dyspepsia), skin events (pruritus, rash, and erythema), nasopharyngitis, urinary tract infection, upper respiratory tract infection, albumin urine present, proteinuria, and microalbuminuria. The AE profile was similar for subjects who received 240 mg TID.

In placebo-controlled studies, decreases in mean white blood cell (WBC) and lymphocyte counts were observed over the first year of treatment (approximately 10% and 30%, respectively) with both doses of BG00012. Mean WBC and lymphocyte counts then plateaued and remained stable, even during longer periods of observation of approximately 3.5 years. An analysis of the data did not show a clear correlation between infections, serious infections, and lymphocyte counts. No increased risk of infection, serious infection, or opportunistic infection was observed in subjects treated with BG00012 in the placebo-controlled studies. In October 2014, in the 109MS303 extension study in adult subjects, in the setting of severe, prolonged lymphopenia for 3.5 years, a subject developed progressive multifocal leukoencephalopathy. With open-label and marketed use of BG00012, there has been no other evidence of increased risk of infections, serious infections, or opportunistic infections.

BG00012 was also associated with a small increase in the incidence of elevations of liver transaminases compared to placebo. In the controlled studies, this increase was primarily due to differences that occurred within the first 6 months of treatment. The majority of subjects with elevations had alanine transaminase (ALT) or aspartate transaminase (AST) levels  $< 3$  times the upper limit of normal (ULN). No patients had elevations of ALT or AST  $\geq 3 \times$  ULN associated with an elevation in total bilirubin of  $> 2 \times$  ULN. There were no cases of hepatic failure due to BG00012. During extended treatment with BG00012, ALT and AST levels remained stable through 3.5 years of observation. Based on these data, there appears to be a transient increase in liver transaminases with BG00012 relative to placebo that does not appear to be associated with any increase in clinically significant liver pathology.

CONFIDENTIAL

The information contained herein may not be used, disclosed, or published without the written consent of Biogen MA Inc.

Although the kidney was identified as a target organ of BG00012 toxicity in nonclinical studies, subjects treated with BG00012 in the clinical studies did not appear to have a higher risk of renal or urinary events. Small increases in proteinuria were observed, but the increases did not appear to be clinically significant. On laboratory evaluation, there were no clinically relevant changes in blood urea nitrogen (BUN), creatinine, electrolytes, calcium, phosphorus, parathyroid hormone, or 1,25-dihydroxyvitamin D. In the Phase 3 studies (Study 109MS301 and Study 109MS302), there were no differences between placebo and BG00012 BID in the incidence of proteinuria on 2 consecutive urinalyses (defined as trace or greater) or on findings of 3+ or 4+ protein, both of which are potential indicators of significant proteinuria and renal dysfunction. In addition, there was no evidence of changes in  $\beta$ 2-microglobulin and microalbumin, 2 more sensitive and specific markers of renal tubular dysfunction, over time even during longer periods of observation of approximately 3.5 years.

In the controlled studies, there was no increased incidence of malignancies in subjects who received BG00012 compared with placebo. The types of malignancies observed and their incidence were within expected background rates.

The pharmacokinetics, efficacy, and safety of BG00012 on pediatric MS were evaluated in Study 109MS202, an open-label multicenter, multiple-dose study that enrolled 22 subjects 13 to 17 years of age. The dosing regimen was the same as the approved BG00012 dosing regimen in adults with RRMS. The pharmacokinetics, efficacy, and safety results in the pediatric subjects in Study 109MS202 were consistent with the overall BG00012 experience to date in adult healthy volunteers and adult subjects with RRMS. BG00012 was effective in reducing brain MRI lesions over a 24-week Treatment Period. Pharmacokinetic parameters in pediatric and adult subjects were comparable. The safety and tolerability profile of BG00012 was consistent with that observed in previously conducted studies in adult subjects with RRMS.

## 5.2. Study Rationale

Study 109MS306 is designed to collect data to evaluate the safety, tolerability, and efficacy of BG00012 in pediatric subjects with RRMS.

In adult subjects with RRMS, BG00012 demonstrated efficacy and safety in 2 large Phase 3 studies, Study 109MS301 (DEFINE) and Study 109MS302 (CONFIRM) and BG00012 (Tecfidera<sup>®</sup>) has been approved in the US and other countries for adult use. In these Phase 3 studies, BG00012 had a significant effect on clinical endpoints of relapses and disability, as well as MRI endpoints, including the number and volume of new or newly enlarging T2 hyperintense lesions, Gd-enhancing lesions, and new T1 hypointense lesions compared with placebo. These effects were seen as early as 6 months and were maintained over the 2 years of the studies.

With no approved MS therapies in the pediatric population, there is a need for approved treatment options. In the adult population, BG00012 is an oral therapy with demonstrated efficacy and an acceptable tolerability and safety profile. This study is being conducted to evaluate BG00012 in the pediatric population.

CONFIDENTIAL

The information contained herein may not be used, disclosed, or published without the written consent of Biogen MA Inc.

Part 1, the randomized, active control phase, will assess the safety, tolerability, efficacy, and health outcomes of BG00012 in pediatric subjects with RRMS compared with a disease modifying treatment.

Part 2, the extension phase of the study, will assess long-term safety and health outcomes in subjects with RRMS treated with BG00012.

### **5.3. Rationale for Dose and Schedule Selection**

In 2 Phase 3 pivotal studies, safety, tolerability, and efficacy of BG00012 240 mg BID have been established and evaluated in adults with MS as young as 18 years of age and with weights as low as 34.0 kg. Moreover, the safety and efficacy profile was unchanged regardless of weight. In addition, there are no apparent differences in the kinetics and metabolism across the age range from 18 to 56 years, suggesting that disposition of BG00012 is not likely to change with age.

In adults, after oral administration, dimethyl fumarate (DMF) is well absorbed and extensively metabolized by esterases to its primary active metabolite, monomethyl fumarate (MMF). Downstream metabolism of DMF/MMF occurs through the tricarboxylic acid cycle, with exhalation of CO<sub>2</sub> serving as a major route of elimination.

Published data [Zhu 2009] indicate that there were no notable differences in the expression and activities of esterases in juveniles (12 to 18 years old) when compared with adults. For these reasons, BG00012 240 mg BID, the approved dose in adults, has been chosen for this study. Also, consistent with the recommended dosing in adults, the starting dose for BG00012 in this study will be 120 mg BID, orally, and should be increased to 240 mg BID after 7 days.

#### *Rationale for Comparator Product*

An active comparator will be used in this open-label study because interferon  $\beta$  (IFN  $\beta$ ) has been approved in some areas of the world for the treatment of pediatric MS and is commonly used in clinical practice to treat pediatric patients with MS. Avonex<sup>®</sup> (IFN  $\beta$ -1a) is marketed around the world as a therapeutic option for patients with relapsing forms of MS to slow the accumulation of physical disability and decrease the frequency of clinical exacerbations. Efficacy was demonstrated in adult patients with MS who had experienced a first clinical episode and had MRI features consistent with MS. The use of IFN  $\beta$ -1a in pediatric patients is well documented and appears to have an acceptable safety profile [Adams 1999; Ghezzi 2005; Mikaeloff 2001; Pohl 2005; Waubant and Chabas 2009].

CONFIDENTIAL

The information contained herein may not be used, disclosed, or published without the written consent of Biogen MA Inc.

## **6. PART 1**

### **6.1. Part 1 Main Objectives**

The main objectives of Part 1 are as follows:

- To evaluate the safety, tolerability, and efficacy of BG00012 in pediatric subjects with RRMS, as compared with a disease-modifying treatment.
- To assess health outcomes and evolution of disability.

### **6.2. Part 1 Endpoints**

#### **6.2.1. Primary Endpoint**

The primary endpoint of Part 1 is the proportion of subjects free of new or newly enlarging T2 hyperintense lesions on brain MRI scans at Week 96.

#### **6.2.2. Secondary Endpoints**

The secondary endpoints of Part 1 are as follows:

- Number of new or newly enlarging T2 hyperintense lesions on brain MRI scans at Weeks 24 and 96
- Proportion of subjects free of new or newly enlarging T2 hyperintense lesions on brain MRI scans at Weeks 24 and 48
- Proportion of subjects free of new MRI activity (i.e., free of Gd-enhancing and free of new or newly enlarging T2 MRI lesions on brain MRI scans) at Weeks 24, 48, and 96
- Time to first relapse
- Proportion of subjects free of relapse up to Week 96
- Annualized relapse rate (ARR) at Weeks 48 and 96
- Incidence of AEs and serious adverse events (SAEs), including prospective follow-up of flushing, nausea, abdominal pain, and diarrhea
- Vital signs, electrocardiograms (ECGs), and changes in clinical laboratory data, including liver function, renal function, hematologic, and coagulation parameters
- Fatigue as measured by the PedsQL Multidimensional Fatigue Scale scores

CONFIDENTIAL

The information contained herein may not be used, disclosed, or published without the written consent of Biogen MA Inc.



- Quality of Life as measured by the PedsQL
- Change from baseline to Week 96 in the EDSS score

### **6.2.3. Exploratory Endpoints**

The exploratory endpoints of Part 1 are as follows:

- Number of new or newly enlarging T2 hyperintense lesions on brain MRI scans at Weeks 48 and 72
- Proportion of subjects free of new or newly enlarging T2 hyperintense lesions on brain MRI scans at Week 72
- Proportion of subjects free of new MRI activity (i.e., free of Gd-enhancing and free of new or newly enlarging T2 MRI lesions on brain MRI scans) at Week 72
- Number of new T1 hypointense lesions on brain MRI scans at Weeks 24, 48, 72, and 96
- Number of Gd-enhancing lesions on brain MRI scans at Weeks 24, 48, 72, and 96
- Time to progression of disability at 96 weeks as measured by at least a 1.0 point increase on the EDSS from baseline EDSS  $\geq 1.0$  that is sustained for 12 weeks, or at least a 1.5 point increase on the EDSS from baseline EDSS = 0 that is sustained for 12 weeks
- BVMT-R scores (to assess learning/memory) and SDMT scores (to assess processing speed), and school progression query at Weeks 48 and 96

## **6.3. Part 1 Study Design**

### **6.3.1. Overview**

Part 1 will be an open-label, randomized, multicenter, multiple-dose, active-controlled, parallel-group phase to evaluate the safety, tolerability, and efficacy of daily oral BG00012 administered for 96 weeks, compared with disease modifying treatment for pediatric MS, in male and female pediatric subjects with RRMS (aged from 10 to less than 18 years old at the time of informed consent or assent). Only subjects who have agreed (through parents or legal guardians, according to local regulations) with their treating physician to be involved in the study will be enrolled. Subjects will be screened over a maximum of 6 weeks prior to first dose.

Eligible subjects will be randomly assigned in a 1:1 ratio to treatment with BG00012, administered orally at a dose of 240 mg BID, or IFN  $\beta$ -1a, administered at a dose of 30  $\mu$ g once weekly by intramuscular (IM) injection. Randomization will be stratified according to whether

CONFIDENTIAL

The information contained herein may not be used, disclosed, or published without the written consent of Biogen MA Inc.

or not the subject received therapy with IFN  $\beta$ -1a or glatiramer acetate in the 4 weeks prior to study entry and in accordance with the following 3 age groups:

- 10 to <13 years: at least 10 evaluable (for primary endpoint) subjects
- 13 to <15 years: at least 20 evaluable (for primary endpoint) subjects
- 15 to <18 years: at least 60 evaluable (for primary endpoint) subjects

The goal is to obtain a total of at least 100 evaluable subjects. At least 30 evaluable subjects must be male.

Subjects will have clinic visits at Screening (within 6 weeks of Baseline); Baseline (Day 1); and Weeks 4, 8, 12, 24, 36, 48, 60, 72, 84, and 96. At Week 2, subjects will receive a follow-up safety telephone call.

Subjects with abnormal laboratory values after Week 12 (after which clinic visits occur once every 3 months) will be returned to the initial every-4-week schedule for the laboratory assessments until laboratory values are normalized (see Section 6.6.3). Subjects treated with BG00012 who complete, temporarily withhold, or permanently discontinue BG00012 treatment for any reason and have a lymphocyte count less than the lower limit of normal (<LLN) will be followed every 4 weeks for 24 weeks, then every 12 weeks (**or sooner, if clinically indicated or at the Investigator's discretion**) until the lymphocyte count is  $\geq$ LLN, for at least 48 weeks following BG00012 treatment discontinuation, or until initiation of another MS disease modifying therapy, whichever occurs first (see Section 6.6.4). Any subject treated with BG00012 in Part 1 with a lymphocyte count <LLN being followed at the Part 1 Week 96 Visit (including subjects who completed, are temporarily withholding, or permanently discontinued BG00012 treatment) will continue follow-up within Part 2 of the study.

Treatment of an acute event may proceed at the discretion of the *treating* neurologist only after the *examining* neurologist has completed his/her examination. Treatment of an acute event of relapse with intravenous methylprednisolone (IVMP) may proceed at the discretion of the *treating* neurologist and will not affect the subject's eligibility to continue in the study. The subject will continue on their assigned study treatment while being treated with IVMP.

Dose reduction will be allowed for subjects who are unable to tolerate treatment due to flushing and/or GI disturbance (Section 6.6.3.1). Dosing interruptions (or permanent discontinuation) will be required in the event of significantly elevated liver or renal function tests or decreased WBC or lymphocyte counts (Sections 6.6.3.1 and 6.6.4.1). Subjects who prematurely discontinue study treatment should remain in the study and continue protocol scheduled evaluations (Section 6.7.1).

See [Figure 1](#) for the Part 1 study design. Tests and assessments for Part 1 are outlined in [Table 1](#) and [Table 2](#). A full clinical study report (CSR) will be written at the end of Part 1.

CONFIDENTIAL

The information contained herein may not be used, disclosed, or published without the written consent of Biogen MA Inc.

### 6.3.2. Overall Part 1 Duration and Follow-Up

Part 1 will consist of Screening (up to 6 weeks), Treatment Period (96 weeks), and Safety Follow-Up for those subjects who are not continuing into Part 2. All subjects who complete the Week 96 Visit will be eligible to participate in Part 2.

Subjects with abnormal laboratory values after Week 12 (after which clinic visits occur once every 3 months) who are allowed to resume BG00012 dosing will be returned to the initial every 4-week schedule for safety assessments (clinical and laboratory safety assessments). Subjects treated with BG00012 who complete, temporarily withhold, or permanently discontinue study treatment for any reason and have a lymphocyte count  $<LLN$  will be followed every 4 weeks for 24 weeks, then every 12 weeks (**or sooner, if clinically indicated or at the Investigator's discretion**) until the lymphocyte count is  $\geq LLN$ , for at least 48 weeks following BG00012 treatment discontinuation, or until initiation of another MS disease modifying therapy, whichever occurs first (see Section 6.6.4). Any subject treated with BG00012 in Part 1 with a lymphocyte count  $<LLN$  being followed at the Part 1 Week 96 Visit (including subjects who completed, are temporarily withholding, or permanently discontinued BG00012 treatment) will continue follow-up within Part 2 of the study.

Subjects who are allowed to resume BG00012 dosing following a 2- to 4-week interruption will restart dosing at a reduced dose for 1 week. Subjects must also return to the initial every-4-week visit schedule for safety assessments (see Section 6.10 for clinical and laboratory safety assessments) for 2 consecutive normal laboratory assessments before reverting to the every-3-month schedule.

Subjects who choose not to enroll in Part 2 will have a Safety Follow-Up Visit no later than 4 weeks after taking the final dose. Subjects who prematurely withdraw from the study will complete the Early Withdrawal Visit and the Safety Follow-Up Visit no later than 4 weeks after taking their final dose. The Unscheduled Relapse Assessment Visit and Lymphocyte Follow-Up Visit will be performed as necessary.

Subject eligibility for the study will be determined within a maximum of 6 weeks prior to Baseline (Day 1).

#### 6.3.2.1. Treatment

Eligible subjects will have clinic visits at Baseline (Day 1) and Weeks 4, 8, 12, 24, 36, 48, 60, 72, and 84 during the Treatment Period.

#### 6.3.2.2. Post-Treatment

Subjects who prematurely **withdraw from the study** should complete all study assessments for the Early Withdrawal Visit at the time of withdrawal.

Subjects who will not participate in Part 2 will return to the site for the End of Part 1 Visit (Week 96).

CONFIDENTIAL

The information contained herein may not be used, disclosed, or published without the written consent of Biogen MA Inc.

### 6.3.2.3. Follow-Up

Subjects who prematurely **withdraw from the study** will complete the study assessments for the Safety Follow-Up Visit no later than 4 weeks after the last dose of study treatment.

Subjects who opt not to continue in Part 2 must complete the Safety Follow-Up Visit no later than Week 100.

Subjects treated with BG00012 who complete, temporarily withhold, or permanently discontinue BG00012 treatment for any reason and have a lymphocyte count  $<LLN$  will be followed every 4 weeks for 24 weeks, then every 12 weeks (**or sooner, if clinically indicated or at the Investigator's discretion**) until the lymphocyte count is  $\geq LLN$ , for at least 48 weeks following BG00012 treatment discontinuation, or until initiation of another MS disease modifying therapy, whichever occurs first (see Section 6.6.4). Any subject treated with BG00012 in Part 1 with a lymphocyte count  $<LLN$  being followed at the Part 1 Week 96 Visit (including subjects who completed, are temporarily withholding, or permanently discontinued BG00012 treatment) will continue follow-up within Part 2 of the study.

### 6.3.3. Relapses

Relapses are defined as new or recurrent neurologic symptoms not associated with fever or infection, lasting at least 24 hours, and accompanied by new objective neurological findings upon examination by the *examining* neurologist. The subject must have objective signs on the *examining* neurologist's examination confirming the event. New or recurrent neurologic symptoms that evolve gradually over months should be considered disease progression, not an acute relapse, and should not be treated with steroids. New or recurrent neurologic symptoms that occur less than 30 days following the onset of a protocol-defined relapse should be considered part of the same relapse and would not be treated with IVMP within the protocol.

If a subject experiences new neurologic symptoms, the subject or caregiver must contact the *treating* neurologist or *treating* nurse as soon as possible and within 48 hours of the onset of symptoms to complete a Telephone Questionnaire to determine the necessity of an unscheduled Relapse Assessment Visit. If required, the subject will then be evaluated in person by the *treating* neurologist at the unscheduled Relapse Assessment Visit, which is to be conducted as soon as possible and within 72 hours of the onset of the potential relapse. If, in the opinion of the *treating* neurologist, an MS relapse may have occurred, the subject must also be evaluated by the *examining* neurologist as soon as possible and within 5 days of the onset of the symptoms. The *examining* neurologist is to perform a detailed neurologic examination and obtain an EDSS score. New objective findings on neurological examination performed by the *examining* neurologist are required to confirm that a protocol-defined relapse has occurred. Subjects may not begin corticosteroid treatment of the relapse per protocol until after the *examining* neurologist has examined them. The *examining* neurologist is permitted to report the examination findings to the *treating* neurologist so that he/she can evaluate treatment options.

CONFIDENTIAL

The information contained herein may not be used, disclosed, or published without the written consent of Biogen MA Inc.

Relapse Assessment Visits are to be conducted as soon as possible and within 72 hours of the onset of any new or worsening neurologic symptoms or suspected protocol-defined relapse (Figure 4). Unscheduled Relapse Assessment Visits should not modify or replace the subjects' visit schedule.

#### **6.3.3.1. Treatment of Relapses on Scheduled or Unscheduled Visits**

Treatment of an acute relapse may proceed at the discretion of the *treating* neurologist only after the *examining* neurologist has completed his/her examination and only after a Gd-enhancing MRI of the brain has been performed as per Figure 4. The treatment for relapse in this study is either 3 days or 5 days with IVMP, up to 1000 mg/day. Methylprednisolone can be given once a day or in divided doses. Any changes to this treatment should first be discussed with the Biogen Medical Director or designee.

Steroid retreatment of the same relapse is not allowed unless approved by the Biogen Medical Director or designee, who may consult with the lead Principal Investigator of that country.

### **6.4. Part 1 Selection of Subjects**

#### **6.4.1. Inclusion Criteria**

To be eligible to participate in this study, candidates must meet the following eligibility criteria at the time of randomization (Day 1) or at the timepoint specified in the individual eligibility criterion listed:

1. Ability of parents, legal guardians, and/or subjects to understand the purpose and risks of the study and provide signed and dated informed consent and authorization to use protected health information (PHI) in accordance with national and local subject privacy regulations. Subjects will provide assent in addition to the parental or guardian consent, as appropriate, as per local regulations.
2. Males and females aged from 10 to less than 18 years old at the time of informed consent or assent.
3. Must have a body weight of  $\geq 30$  kg.
4. Must have a diagnosis of RRMS according to the International Pediatric Multiple Sclerosis Study Group criteria for pediatric MS (2013) [Krupp 2013] (consensus definition for pediatric RRMS).
5. Must be ambulatory with a baseline EDSS score between 0 and 5.5, inclusive.
6. Must have experienced at least 1 of the following 3 conditions:
  - a) at least 1 relapse within the last 12 months prior to Day 1, with a prior brain MRI demonstrating lesions consistent with MS, or

CONFIDENTIAL

The information contained herein may not be used, disclosed, or published without the written consent of Biogen MA Inc.

- b) at least 2 relapses within the last 24 months prior to Day 1, with a prior brain MRI demonstrating lesions consistent with MS, or
  - c) evidence of Gd-enhancing lesions of the brain on an MRI performed within the 6 weeks prior to Day 1.
7. Must be neurologically stable, with no evidence of relapse within 50 days prior to Day 1 and no evidence of corticosteroid treatment within 30 days prior to Day 1.
  8. Subjects of childbearing potential who are sexually active must be willing to practice effective contraception during the study and be willing and able to continue contraception for at least 30 days after their final dose of study treatment.

#### **6.4.2. Exclusion Criteria**

Candidates will be excluded from study entry if any of the following exclusion criteria exist at the time of randomization (Day 1) or at the timepoint specified in the individual criterion listed:

##### *Medical History*

1. Primary progressive, secondary progressive, or progressive relapsing MS (as defined by [\[Lublin and Reingold 1996\]](#)). These conditions require the presence of continuous clinical disease worsening over a period of at least 3 months. Subjects with these conditions may also have superimposed relapses but are distinguished from relapsing-remitting subjects by the lack of clinically stable periods or clinical improvement.
2. Disorders mimicking MS, such as other demyelinating disorders (e.g., acute disseminated encephalomyelitis), systemic autoimmune disorders (e.g., Sjögren disease, lupus erythematosus), metabolic disorders (e.g., dystrophies), and infectious disorders.
3. History of premalignant or malignant disease. Subjects with basal cell carcinoma that has been completely excised prior to screening will remain eligible.
4. History of severe allergic or anaphylactic reactions, or known drug hypersensitivity to DMF, fumaric acid esters, or interferon  $\beta$ -1a (IFN  $\beta$ -1a).
5. History of abnormal laboratory results indicative of any significant endocrinologic, hematologic, hepatic, immunologic, metabolic, urologic, renal, and/or any other major disease that would preclude participation in a clinical study.
6. History of clinically significant cardiovascular, pulmonary, GI, dermatologic, growth, developmental, psychiatric (including depression), neurologic (other than MS), and/or other major disease that would preclude participation in a clinical study.
7. History of human immunodeficiency virus.

CONFIDENTIAL

The information contained herein may not be used, disclosed, or published without the written consent of Biogen MA Inc.

8. History of drug or alcohol abuse (as defined by the Investigator) within the 2 years prior to Day 1.
9. An MS relapse that has occurred within 50 days prior to Day 1 AND/OR the subject has not stabilized from a previous relapse prior to Day 1.
10. History or positive test result at Screening for hepatitis C virus antibody or hepatitis B virus (defined as positive for hepatitis B surface antigen [HBsAg] or hepatitis B core antibody [HBcAb]). Subjects with immunity to hepatitis B from either active vaccination (defined as negative HBsAg, positive hepatitis B surface antibody [HBsAb] and negative HBcAb) or from previous natural infection (defined as negative HBsAg, positive HBsAb IgG, and positive HBcAb) are eligible to participate in the study (definitions are based on the Centers for Disease Control and Prevention [CDC]'s interpretation of the hepatitis B serology panel [CDC 2007]; Appendix 4, Section 25)).
11. Any of the following abnormal blood test results at Screening:
  - ALT, AST, or gamma-glutamyl-transferase (GGT)  $\geq 2 \times$  ULN
  - leukocytes  $< 3500/\text{mm}^3$
  - eosinophils  $> 0.7 \times 10^3/\mu\text{L}$  or  $> 0.7 \text{ GI/L}$
  - absolute lymphocyte count  $< \text{LLN}$
12. Proteinuria (1+ or greater) at Screening confirmed by a spot protein/creatinine ratio (with morning void)  $> 0.2 \text{ mg/mg}$  approximately 2 weeks later. Note: Documented benign proteinuria is not exclusionary.

OR

Any of the following additional abnormal urine tests at Screening confirmed by a second urinalysis approximately 2 weeks later:

- hematuria, without known etiology
- glycosuria, without known etiology

Note: If a subject has a positive test at Screening and the etiology is known (e.g., due to menses or urinary tract infection in the case of hematuria or due to recent steroid use or elevated serum glucose in the case of glycosuria), a repeat test is not required.

### *Treatment History*

13. Any previous treatment with Fumaderm<sup>®</sup> or BG00012.

CONFIDENTIAL

The information contained herein may not be used, disclosed, or published without the written consent of Biogen MA Inc.

14. Prior treatment with any of the following:

- total lymphoid irradiation
- cladribine
- T-cell or T-cell receptor vaccination
- any therapeutic monoclonal antibody, with the exception of rituximab (see Exclusion Criterion 15) or natalizumab (see Exclusion Criterion 16)

15. Prior treatment with any of the following medications within the 12 months prior to Day 1:

- mitoxantrone
- cyclophosphamide
- rituximab

16. Prior treatment with any of the following medications or procedures within 6 months prior to Day 1:

- fingolimod
- teriflunomide
- natalizumab
- cyclosporine
- azathioprine
- methotrexate
- mycophenolate mofetil
- laquinimod
- IV immunoglobulin
- plasmapheresis or cytapheresis

17. Treatment with any of the following medications within 30 days prior to Day 1:

CONFIDENTIAL

The information contained herein may not be used, disclosed, or published without the written consent of Biogen MA Inc.



- steroids (IV or oral corticosteroid treatment, including agents that may act through the corticosteroid pathway [e.g., low dose naltrexone])
  - 4-aminopyridine or related products (except subjects on a stable dose of controlled-release fampridine for 3 months)
18. Current enrollment in any other investigational drug study or participation in any other investigational study within the 6 months prior to Day 1.

#### *Miscellaneous*

19. Female subjects considering becoming pregnant or breastfeeding while in the study or who are pregnant or breastfeeding.
20. Inability to comply with study requirements.
21. Other unspecified reasons that, in the opinion of the Investigator or Biogen, make the subject unsuitable for enrollment.
22. Subjects for whom MRI was contraindicated, e.g., who had pacemakers or other contraindicated implanted metal devices, were allergic to Gd, had renal impairment, or had claustrophobia that could not be medically managed.

## **6.5. Part 1 Enrollment and Randomization Procedures**

### **6.5.1. Enrollment and Screening**

Subjects must be consented before any screening tests or assessments are performed. At the time of consent, the subject will be enrolled into the study. Participating study sites are required to document all screened candidates initially considered for inclusion in this study. If a subject is excluded from the study, the reasons for exclusion will be documented in the subject's source documents and on the screening log.

### **6.5.2. Randomization of Subjects**

Subjects will be randomized at the Baseline Visit (Day 1), after all baseline assessments have been completed and after the Investigator has verified that they are eligible per criteria in Sections 6.4.1 and 6.4.2. No subject may begin treatment prior to randomization and assignment of a unique subject identification number. Any subject identification numbers that are assigned will not be reused even if the subject does not receive treatment.

Subjects will be randomized to receive BG00012 or IFN  $\beta$ -1a in a 1:1 ratio and stratified according to whether or not the subject received therapy with IFN  $\beta$ -1a or glatiramer acetate in the 4 weeks prior to study entry and according to 3 age groups (10 to <13 years, 13 to <15 years, and 15 to <18 years). Subjects who withdraw from the study may not be replaced.

CONFIDENTIAL

The information contained herein may not be used, disclosed, or published without the written consent of Biogen MA Inc.

See the Study Reference Manual for details on randomization and registration.

### **6.5.3. Blinding Procedures**

This is an open-label study.

## **6.6. Part 1 Treatment of Subjects**

Biogen will provide investigational product to sites in Canada. Biogen Idec Research Limited will provide investigational products to all other countries.

See Section 6.8 (Part 1 Study Treatment Management) for specifics on the preparation, storage, handling, disposal, and accountability of study treatment.

### **6.6.1. Treatment Schedule and Administration**

#### **6.6.1.1. BG00012**

BG00012 will be taken orally. Subjects will take 1 capsule orally at a dose of 120 mg BID for the first 7 days and 2 capsules orally at a dose of 240 mg BID thereafter.

Subjects will be instructed to swallow each BG00012 capsule whole and not chewed. The capsule and its contents are not to be crushed, divided, dissolved, sucked, or chewed since the enteric-coating of the microtablets in the capsule helps to prevent irritant effects on the stomach. If unable to swallow the capsule, the capsule may be opened and the contents mixed with food *immediately* prior to consumption.

Study site staff should refer to the Directions for Handling and Administration (DHA) located in the Study Reference Manual for specific instructions on the handling, preparation, administration, and disposal of the study treatment.

See [Figure 1](#) for schematic on the study design.

#### **6.6.1.2. Interferon $\beta$ -1a (Avonex)**

IFN  $\beta$ -1a (Avonex) at 30  $\mu$ g administered IM once weekly is marketed around the world as a therapy for patients with relapsing forms of MS to slow the accumulation of physical disability and decrease the frequency of clinical exacerbations. Efficacy has also been demonstrated in patients with MS who have experienced a first clinical episode and have MRI features consistent with MS.

The most frequently reported AEs are flu-like symptoms, fever, and fatigue.

Avonex will be self-administered (or given via a proxy) once weekly beginning with Day 1/Baseline. Avonex doses will be titrated during the first 4 weeks of the Study Treatment Period using the Avostartgrip™ titration kit. Avonex will be started at a dose of 7.5  $\mu$ g and the

CONFIDENTIAL

The information contained herein may not be used, disclosed, or published without the written consent of  
Biogen MA Inc.

dose will be increased by 7.5 µg each week for 3 weeks until the recommended dose of 30 µg is achieved to reduce the incidence and severity of flu-like symptoms that may occur when initiating Avonex therapy at a dose of 30 µg. Note: At the discretion of the treating neurologist, dose titration may not be necessary. Following titration, Avonex will be administered once weekly by IM injection according to local prescribing information.

All training procedures for the Avonex Prefilled Syringe and Avonex Pens will be outlined in the Study Reference Guide.

Avonex doses should be taken within 2 days of the scheduled dose of Avonex. If the subject is unable to have the dose within 2 days, this dose should be skipped, and the next dose should be taken as scheduled. Doses should not be doubled to make up for missed doses.

For additional information on Avonex, see the Avonex label.

### **6.6.2. Treatment Precautions**

Medications for the treatment of severe hypersensitivity reactions (e.g., epinephrine for subcutaneous injections, diphenhydramine for injection) should be available for immediate use.

See the DHA for detailed instructions.

#### **6.6.2.1. Management of Subjects Receiving Avonex**

For additional information on the management of subjects receiving Avonex, refer to the local prescribing information for Avonex.

### **6.6.3. Modification of Dose and/or Treatment Schedule for BG00012**

#### **6.6.3.1. BG00012 Dose Reduction**

Dose reduction will be allowed only for subjects who are unable to tolerate BG00012 *due to flushing and/or GI disturbances* (dose reductions will not be allowed for abnormal laboratory values; for management of abnormal laboratory values, see Section 6.6.3.2, Section 6.6.3.3, and Section 6.6.3.4). Subjects who do not tolerate BG00012 will reduce their dose by taking one 120-mg capsule BID for up to 4 weeks. Within 4 weeks at the reduced dose, subjects will resume taking 2 capsules BID. If the subject is still unable to tolerate BG00012, the subject must discontinue BG00012 as described in Section 6.7.1. Any subject who prematurely discontinues dosing with BG00012 may remain in the study and continue protocol scheduled tests and assessments.

#### **6.6.3.2. BG00012 Dosing Interruption for Abnormal Laboratory Values**

BG00012 must be temporarily withheld when any of the following laboratory values meet the threshold limits defined in Table 8 (laboratory abnormalities that require immediate and permanent discontinuation of study treatment are also specified in Table 8).

CONFIDENTIAL

The information contained herein may not be used, disclosed, or published without the written consent of Biogen MA Inc.

**Table 8: Laboratory Criteria Requiring Withholding or Permanent Discontinuation of BG00012 Treatment**

| Laboratory Parameter | Laboratory Result                | Required Action                                                                                                                                                                                                                                                                                                                                                                                                                                                                                                                                                                                                                                                                                                                 |
|----------------------|----------------------------------|---------------------------------------------------------------------------------------------------------------------------------------------------------------------------------------------------------------------------------------------------------------------------------------------------------------------------------------------------------------------------------------------------------------------------------------------------------------------------------------------------------------------------------------------------------------------------------------------------------------------------------------------------------------------------------------------------------------------------------|
| AST<br>or<br>ALT     | $>3 \times \text{ULN}$           | The Investigator should repeat the test as soon as possible. If the retest value confirms AST or ALT $>3 \times \text{ULN}$ , the study treatment must be withheld. If the value remains $>3 \times \text{ULN}$ for $\geq 4$ weeks after discontinuation of BG00012, then the subject <b>must permanently discontinue study treatment with BG00012, and the event must be recorded as an AE.</b>                                                                                                                                                                                                                                                                                                                                |
| Creatinine           | $>1.2 \times \text{ULN}$         | The Investigator should repeat the test as soon as possible. If the retest value confirms that creatinine is $>1.2 \times \text{ULN}$ , the study treatment must be withheld. If the value remains $>1.2 \times \text{ULN}$ for $\geq 4$ weeks after discontinuation of study treatment, then the subject <b>must permanently discontinue study treatment with BG00012, and the event must be recorded as an AE.</b>                                                                                                                                                                                                                                                                                                            |
| WBC                  | $<2000/\text{mm}^3$              | The Investigator should repeat the test as soon as possible. If the retest value confirms that WBC count is $<2000/\text{mm}^3$ , the study treatment must be withheld. If the value remains $<2000/\text{mm}^3$ for $\geq 4$ weeks after discontinuation of study treatment, then the subject <b>must permanently discontinue study treatment with BG00012, and the event must be recorded as an AE.</b>                                                                                                                                                                                                                                                                                                                       |
| Urinalysis           | Positive Hematuria on Microscopy | The Investigator should repeat the test as soon as possible. If the retest confirms microscopic hematuria without known etiology, the study treatment must be withheld. Urine cytology must be performed under the following conditions:<br>a) hematuria is present on 2 consecutive tests, or b) hematuria is observed at the End of Study Visit, Early Withdrawal Visit, or Safety Follow-Up Visit.<br><br>If hematuria persists for $\geq 4$ weeks after discontinuation of study treatment or if cytology is positive, then the subject <b>must permanently discontinue study treatment with BG00012, and the event must be recorded as an AE. Subjects should be referred to a nephrologist for further investigation.</b> |

AE = adverse event; ALT = alanine transaminase; AST = aspartate transaminase; ULN = upper limit of normal; WBC = white blood cell.

While dosing is withheld, subjects will continue tests and assessments according to the schedule defined in the protocol (and may also undergo additional assessments to evaluate the laboratory abnormality as per the Investigator's standard practice). In addition, subjects (whether dosing temporarily withheld or permanently discontinued) must have the abnormal laboratory result rechecked at least every 2 weeks (rechecks will be run at the central laboratory) until resolution

CONFIDENTIAL

The information contained herein may not be used, disclosed, or published without the written consent of Biogen MA Inc.

or stabilization of the laboratory value. Depending on the severity and clinical significance of the abnormality, the Investigator may need to perform the retests more frequently.

Subjects who have abnormal laboratory values as described in [Table 8](#) sustained on 3 consecutive occasions (i.e., for more than 4 consecutive weeks) must permanently discontinue dosing with BG00012 study treatment.

#### **6.6.3.3. Resumption of Dosing With BG00012**

Resumption of BG00012 is to be considered on a case-by-case basis and must be discussed with the Medical Monitor. However, subjects who have abnormal laboratory values as described in [Table 8](#) sustained on 3 consecutive occasions (i.e., for more than 4 consecutive weeks) must permanently discontinue dosing with BG00012.

Subjects with abnormal laboratory values after Week 12 (after which clinic visits occur once every 3 months) who are allowed to resume BG00012 dosing following a 2- to 4-week interruption will restart dosing at a reduced dose for 1 week. Subjects must also return to the initial every-4-week visit schedule for safety assessments (see [Section 6.10](#) for clinical and laboratory safety assessments) for 2 consecutive normal laboratory assessments before reverting to the every 3-month schedule. Subjects will take 1 capsule BID for 1 week. After 1 week at the reduced dose, subjects will take 2 capsules BID.

#### **6.6.3.4. Subsequent Development of Additional Laboratory Abnormalities**

Subjects who subsequently develop the same abnormal laboratory value at any other time during the study must permanently discontinue dosing with BG00012 (i.e., only 1 dosing interruption is allowed for each subject for the same laboratory abnormality). However, subjects who subsequently experience a different laboratory abnormality can have study treatment with BG00012 withheld again. For example, if a subject had dosing temporarily withheld for an abnormal ALT, then had dosing resume after ALT returned to acceptable limits, and subsequently developed abnormal WBCs, the subject may have BG00012 withheld again. However, only 2 dosing interruptions are allowed for each subject.

Any subject who experiences abnormal laboratory results (which meet the criteria defined in [Table 8](#)) on a third occasion must discontinue dosing with BG00012 for the remainder of the study.

#### **6.6.3.5. Abnormal Urinalyses That Require Additional Evaluation**

Subjects who develop any of the following abnormal urine laboratory values must have the test repeated 2 weeks later:

- urinary casts (other than hyaline casts)
- glycosuria (trace or greater) in the setting of normal serum glucose

CONFIDENTIAL

The information contained herein may not be used, disclosed, or published without the written consent of Biogen MA Inc.

If the abnormality persists on retesting, the subject should be fully investigated for possible causes and referred for evaluation by a nephrologist if appropriate in the opinion of the Investigator.

Subjects who demonstrate 1+ or greater proteinuria on a urine dipstick (and do not have a documented history of prior benign proteinuria) should have a spot protein/creatinine ratio (on morning void). If spot protein/creatinine ratio is  $>0.2$  mg/mg, the subject should be fully investigated for possible causes and referred for evaluation by a nephrologist if appropriate in the opinion of the Investigator.

**6.6.4. Schedule for Subjects Treated With BG00012 With Abnormal Lymphocyte Count**

**6.6.4.1. Schedule in Part 1 for Subjects Treated With BG00012 With Lymphocyte Count  $<LLN$**

For subjects treated with BG00012, the required action described in [Table 9](#) must be taken when the lymphocyte count is  $<LLN$ .

CONFIDENTIAL

The information contained herein may not be used, disclosed, or published without the written consent of Biogen MA Inc.

**Table 9: Lymphocyte Count Criteria Requiring Additional Testing and/or Permanent Discontinuation of BG00012 Treatment**

| Laboratory Parameter and Treatment Status                                                                                    | Laboratory Result    | Required Action                                                                                                                                                                                                                                                                                                                                                                                                                                                                                                                                                                                                                  |
|------------------------------------------------------------------------------------------------------------------------------|----------------------|----------------------------------------------------------------------------------------------------------------------------------------------------------------------------------------------------------------------------------------------------------------------------------------------------------------------------------------------------------------------------------------------------------------------------------------------------------------------------------------------------------------------------------------------------------------------------------------------------------------------------------|
| Lymphocyte count<br>Active treatment with BG00012                                                                            | <LLN                 | The Investigator should repeat the test within 2 weeks. If retest confirms that lymphocyte count is <LLN, lymphocyte count should be closely monitored (at least every 4 weeks).                                                                                                                                                                                                                                                                                                                                                                                                                                                 |
| Lymphocyte count<br>Active treatment with BG00012                                                                            | <500/mm <sup>3</sup> | The Investigator should repeat the test as soon as possible. If retest confirms that lymphocyte count is <500/mm <sup>3</sup> , lymphocyte count should be closely monitored (at least every 4 weeks). If lymphocyte count is <500/mm <sup>3</sup> for more than 6 months, study treatment must be permanently discontinued.                                                                                                                                                                                                                                                                                                     |
| Lymphocyte count<br>Subjects who complete, temporarily withhold, or permanently discontinue BG00012 treatment for any reason | <LLN                 | Subjects will be followed every 4 weeks for 24 weeks, then every 12 weeks ( <b>or sooner, if clinically indicated or at the Investigator's discretion</b> ) until the lymphocyte count is ≥LLN, for at least 48 weeks following BG00012 treatment discontinuation, or until initiation of another MS disease modifying therapy, whichever occurs first.<br><br>Subjects treated with BG00012 who complete, temporarily withhold, or permanently discontinue study treatment with a lymphocyte count <LLN at the end of Part 1 (including at the End of Part 1/Week 96 Visit) will continue follow-up within Part 2 of the study. |

LLN = lower limit of normal

If BG00012 is permanently discontinued due to lymphocyte count <500/mm<sup>3</sup>, subjects may continue protocol-required tests and assessments and also undergo lymphocyte follow-up every 4 weeks for 24 weeks, then every 12 weeks (**or sooner, if clinically indicated or at the Investigator's discretion**) until the lymphocyte count is ≥LLN, for at least 48 weeks following BG00012 treatment discontinuation, or until initiation of another MS disease modifying therapy, whichever occurs first (see [Table 2](#)). If the lymphocyte count does not recover, the treating neurologist should contact the Medical Monitor.

**6.6.4.2. Schedule for Subjects Who Complete, Temporarily Withhold, or Permanently Discontinue BG00012 for Any Reason and Have a Lymphocyte Count <LLN**

Subjects treated with BG00012 who complete the 96-week Treatment Period and who have a lymphocyte count <LLN will be followed every 4 weeks for 24 weeks, then every 12 weeks (**or sooner, if clinically indicated or at the Investigator's discretion**) until the lymphocyte count is ≥LLN, for at least 48 weeks following BG00012 treatment discontinuation, or until initiation of

CONFIDENTIAL

The information contained herein may not be used, disclosed, or published without the written consent of Biogen MA Inc.

another MS disease modifying therapy, whichever occurs first. If the lymphocyte count does not recover after 48 weeks, the treating neurologist should contact the Medical Monitor. Subjects who complete, temporarily withhold, or permanently discontinue study treatment with a lymphocyte count <LLN at the end of Part 1 (including at the End of Part 1/Week 96 Visit) will continue follow-up within Part 2 of the study.

Subjects who temporarily withhold or permanently discontinue BG00012 treatment for any reason (see Section 6.6.3) and who have a lymphocyte count <LLN will continue protocol-required tests and assessments and also undergo lymphocyte follow-up every 4 weeks for 24 weeks, then every 12 weeks (**or sooner, if clinically indicated or at the Investigator's discretion**) until the lymphocyte count is  $\geq$ LLN, for at least 48 weeks following BG00012 treatment discontinuation, or until initiation of another MS disease modifying therapy, whichever occurs first (see Table 2). If the lymphocyte count does not recover after 48 weeks, the treating neurologist should contact the Medical Monitor.

See Figure 3 for a schedule for subjects who complete, temporarily withhold, or permanently discontinue BG00012 treatment for any reason and who have a lymphocyte count <LLN.

CONFIDENTIAL

The information contained herein may not be used, disclosed, or published without the written consent of Biogen MA Inc.



**Figure 3: Schedule for Subjects Who Complete, Temporarily Withhold, or Permanently Discontinue BG00012 for Any Reason and Have a Lymphocyte Count <LLN**

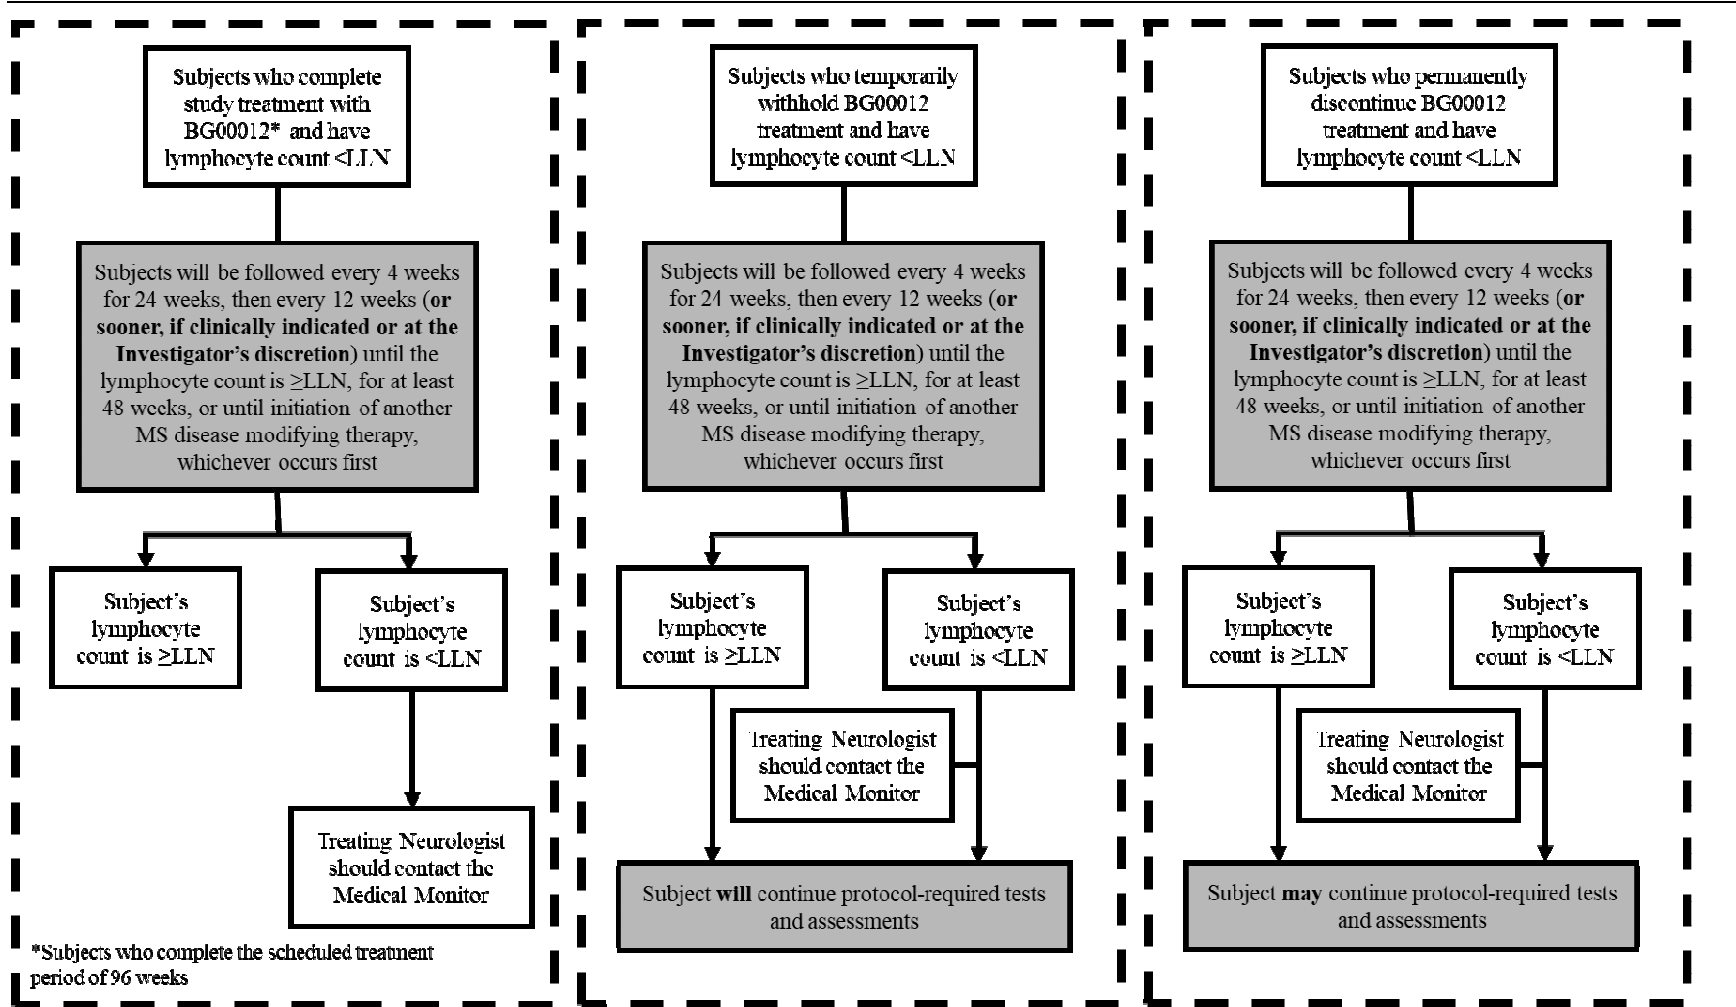

LLN = lower limit of normal

Note: Any subject treated with BG00012 in Part 1 with a lymphocyte count <LLN being followed at the Part 1 Week 96 Visit (including subjects who completed, are temporarily withholding, or permanently discontinued BG00012 treatment) will continue follow-up within Part 2 of the study.

CONFIDENTIAL

The information contained herein may not be used, disclosed, or published without the written consent of Biogen MA Inc.

### **6.6.5. Treatment Compliance**

Compliance with study treatment (BG00012 or IFN  $\beta$ -1a) dosing is to be monitored and recorded by study site staff. Compliance for BG00012 will be monitored by capsule count and captured in the electronic case report form (eCRF). Compliance for Avonex administration will be reported and captured in the eCRF.

### **6.6.6. Concomitant Therapy and Procedures**

#### **6.6.6.1. Concomitant Therapy**

A concomitant therapy is any drug or substance administered between signing the informed consent form (ICF) and the Safety Follow-Up Visit.

A concomitant procedure is any therapeutic intervention (e.g., surgery/biopsy, physical therapy) or diagnostic assessment (e.g., blood gas measurement, bacterial cultures) performed from the time the subject is enrolled in the study until the subject's Safety Follow-Up Visit, unless the subject is being followed for study-related toxicity.

#### **Allowed Concomitant Therapy**

Symptomatic therapy, such as treatment for spasticity, depression, or fatigue, is not restricted, but should be optimized as early as possible during screening in an attempt to maintain consistent treatment for the duration of the study.

Subjects should be instructed not to start taking any new medications, including non-prescribed drugs, unless they have received permission from the Investigator.

#### **Disallowed Concomitant Therapy**

Concomitant treatment with any of the following is not allowed while receiving study treatment, unless approved by the Biogen Medical Director, or as otherwise described in this protocol:

- Any alternative drug treatments directed toward the treatment of MS such as chronic immunosuppressant therapy or other immunomodulatory treatments (including, but not limited to interferon-beta, interferon-alpha, glatiramer acetate, natalizumab, cyclophosphamide, methotrexate, azathioprine, 4-aminopyridine or related products, etc.), with the exception of acute management of protocol-defined relapse (as described below).
- Any investigational product, including investigational symptomatic therapies for MS and investigational therapies for non-MS indications.
- Any systemic steroid therapy including, but not limited to, oral corticosteroids (e.g., prednisone) or periodic (e.g., monthly) treatment with IVMP, except for

CONFIDENTIAL

The information contained herein may not be used, disclosed, or published without the written consent of  
Biogen MA Inc.

protocol-defined treatment of relapses as described in Section 6.6.6.3. Steroids that are administered by non-systemic routes (e.g., topical, inhaled) are allowed.

- Total lymphoid irradiation, cladribine, T-cell or T-cell receptor vaccination, any therapeutic monoclonal antibody, mitoxantrone, cyclosporine, IV immunoglobulin, plasmapheresis, or cytapheresis.

Subjects who receive any of these restricted medications without approval from the Biogen Medical Director(s) will be required to permanently discontinue study treatment and will be withdrawn from the study as outlined in Section 6.7.

The use of concomitant therapies or procedures defined above must be recorded on the subject's eCRF, according to instructions for eCRF completion. AEs related to the administration of these therapies or procedures must be documented on the appropriate eCRF.

#### **6.6.6.2. Concomitant Procedures**

A concomitant procedure is any therapeutic intervention (e.g., surgery/biopsy, physical therapy) or diagnostic assessment (e.g., blood gas measurement, bacterial cultures) performed between the time the subject is enrolled in the study and the Safety Follow-Up Visit, which is to occur no later than 4 weeks after taking their final dose.

The use of concomitant therapies or procedures defined above must be recorded on the subject's eCRF, according to instructions for eCRF completion. AEs related to administration of these therapies or procedures must be documented on the appropriate eCRF.

#### **6.6.6.3. Treatment of Relapses on Scheduled or Unscheduled Visits**

The only protocol-approved treatment for relapse in this study is either 3 days or 5 days with IVMP, up to 1000 mg/day. Methylprednisolone can be given once a day or in divided doses. Subjects may also refuse relapse treatment. Any deviations from this recommended treatment must first be discussed with the Biogen Medical Director or designee.

Study treatment dosing is to continue uninterrupted during IVMP treatment.

#### **6.6.7. Continuation of Treatment**

All subjects who continue treatment in the study until Week 96 will be offered the option to enter Part 2. All subjects who enter Part 2 will receive BG00012. Subjects who do not enter Part 2 will be encouraged to complete all post-treatment assessments at the Safety Follow-Up Visit no later than 4 weeks after taking their final dose.

CONFIDENTIAL

The information contained herein may not be used, disclosed, or published without the written consent of Biogen MA Inc.

## 6.7. Part 1 Withdrawal of Subjects From Study Treatment and/or the Study

### 6.7.1. Discontinuation of Study Treatment

Unless otherwise indicated, a subject must permanently discontinue study treatment for any of the following reasons:

- The subject becomes pregnant. Study treatment must be immediately discontinued. Report the pregnancy according to the instructions in Section 8.5.4.
- The subject desires to discontinue treatment under this protocol.
- The subject experiences a medical emergency that necessitates permanent discontinuation of study treatment.
- The subject develops  $>3 \times$  ULN elevations in ALT or AST that are *sustained* for 4 consecutive weeks after BG00012 treatment is withheld (see Table 8).
- The subject develops a  $>1.2 \times$  ULN elevation in creatinine that is *sustained* for 4 consecutive weeks after BG00012 treatment is withheld (see Table 8).
- The subject develops decreased WBC count  $<2000/\text{mm}^3$  that is *sustained* for 4 consecutive weeks after BG00012 treatment is withheld (see Table 8).
- The subject experiences more than 1 deviation of the same laboratory parameter while receiving BG00012 treatment that meets the threshold limits defined in Table 8 at any time during the study.
- The subject develops lymphocyte count  $<500/\text{mm}^3$  for more than 6 months while receiving BG00012 treatment (see Table 9).
- The subject experiences more than 2 different deviations of laboratory parameters while receiving BG00012 treatment that meet the threshold limits defined in Table 8 and Table 9 at any time during the study. On a third occasion, the subject is required to discontinue dosing for the remainder of the study.
- The subject experiences positive urine cytology while receiving BG00012 treatment (following microscopic hematuria of unknown etiology on 2 consecutive visits) [see Table 8].
- The subject develops renal dysfunction based on a nephrologist's evaluation.
- The subject cannot tolerate study treatment.

CONFIDENTIAL

The information contained herein may not be used, disclosed, or published without the written consent of Biogen MA Inc.

- The subject receives any of the disallowed concomitant medications described in the protocol unless approval was given by the Biogen Medical Director. Note: IVMP for treatment of a protocol-defined relapse is allowed as detailed in Section 6.6.6.3.
- At the discretion of the Investigator for medical reasons or for noncompliance.

The reason for discontinuation of study treatment must be recorded in the subject's eCRF.

Subjects who experience MS relapse or disability progression during the study may continue participation in the study.

Subjects who discontinue treatment may remain in the study and continue protocol-required tests and assessments.

### 6.7.2. Withdrawal of Subjects From Study

Subjects must be withdrawn from the study for any one of the following reasons:

- The subject withdraws consent.
- The subject is unwilling or unable to comply with the protocol.

The reason for the subject's withdrawal from the study must be recorded in the subject's eCRF.

Subjects who withdraw from the study prematurely should complete the Early Withdrawal Visit and the Safety Follow-Up Visit no later than 4 weeks after taking their final dose of BG00012 or IFN  $\beta$ -1a.

## 6.8. Part 1 Study Treatment Management

Study treatment must be stored in a secure location. Accountability for study treatment is the responsibility of the Investigator. More details concerning this responsibility are included in Section 6.8.1.4.

Study treatment must only be dispensed by a pharmacist or medically qualified staff. Study treatment is to be dispensed only to subjects enrolled in this study.

Study site staff should refer to the DHA located in the Study Reference Manual for specific instructions on the handling, preparation, administration, and disposal of the study treatment. **The DHA supersedes all other references (e.g., Investigator's Brochure).**

### 6.8.1. BG00012

BG00012 is a drug product formulated as enteric-coated microtablets in gelatin capsules (blue and white) for oral administration. Each capsule contains 120 mg BG00012.

CONFIDENTIAL

The information contained herein may not be used, disclosed, or published without the written consent of Biogen MA Inc.

Excipients for the manufacturing of the enteric-coated microtablets include microcrystalline cellulose, croscarmellose sodium, talc, colloidal anhydrous silica (colloidal silicon dioxide), magnesium stearate, triethyl citrate, methacrylic acid-methyl methacrylate copolymer, methacrylic acid-ethyl acrylate copolymer, simethicone, sodium lauryl sulfate, and polysorbate 80. Excipients for the manufacturing of the capsule shell include gelatin, titanium dioxide, and indigotin.

The contents of the study treatment label will be in accordance with all applicable regulatory requirements. BG00012 should not be used after the expiration date.

#### **6.8.1.1. BG00012 Preparation**

The individual preparing BG00012 should first carefully review the instructions provided in the DHA.

BG00012 will be provided as capsules. Drug wallets will be prepared for the BG00012 treatment group to ensure that the appropriate treatment is provided to each subject. Drug wallets will be supplied from Interactive Voice/Web Response System (IXRS) at specific timepoints during the study so that the appropriate wallets are correctly dispensed to a subject at the required timepoints throughout the study.

If the packaging is damaged, or if there is anything unusual about the appearance or attributes of the drug wallet or drug, it should not be used. The drug wallet in question should be quarantined at the study site and the problem immediately reported to Biogen.

#### **6.8.1.2. BG00012 Storage**

BG00012 is to be stored at room temperature (15°C to 25°C or 59°F to 77°F), in a secured, locked cabinet with limited access.

#### **6.8.1.3. BG00012 Handling and Disposal**

The Investigator must destroy or return all unused BG00012 as instructed by Biogen.

If any BG00012 supplies are to be destroyed at the study site, the institution/Principal Investigators must obtain prior approval by Biogen. After such destruction, the institution/Principal Investigators must notify Biogen, in writing, of the method of destruction, the date of destruction, and the location of destruction.

#### **6.8.1.4. BG00012 Accountability**

The study site must maintain accurate records demonstrating dates and amount of study treatment received, to whom dispensed (subject by subject accounting), amount returned by the subject, and accounts of any study treatment returned to Biogen or accidentally or deliberately destroyed.

CONFIDENTIAL

The information contained herein may not be used, disclosed, or published without the written consent of Biogen MA Inc.

Unless otherwise notified, all drug wallets, both used and unused, must be saved for study treatment accountability. At the end of the study, reconciliation must be made between the amount of BG00012 supplied, dispensed, and subsequently destroyed or returned to Biogen. A written explanation must be provided for any discrepancies.

## **6.8.2. Comparator Product**

### **6.8.2.1. Interferon $\beta$ -1a (Avonex) Preparation**

IFN  $\beta$ -1a (Avonex) will be provided by Biogen according to local regulations. It will be supplied as a liquid prefilled (Luer lock) syringe (i.e., Avonex Prefilled Syringe) and autoinjector pen (i.e., Avonex Pen<sup>®</sup>) for self-administration by IM (or via a proxy) once weekly in countries in which the Avonex Pen is approved. In countries in which the Avonex Pen is not approved, the Avonex Prefilled Syringe will be provided. These syringes are intended for SINGLE USE INJECTION only. In addition, the Avostartgrip titration kit and Avonex Prefilled Syringes will be provided for the first 4 weeks of the Study Treatment Period.

Once a dose of Avonex is prepared for a subject, it can only be administered to that subject. Any Avonex remaining in the device should not be used for another subject.

The Avonex supplied, which will be dispensed to subjects at each scheduled visit, will contain a sufficient supply of Avonex Prefilled Syringes and IM needles and Avonex Pen needles for each dosing interval.

The Avonex Prefilled Syringe is formulated as a sterile clear liquid for IM injection. Each 0.5 mL of IFN  $\beta$ -1a in a prefilled glass syringe contains 30  $\mu$ g of IFN  $\beta$ -1a. Other ingredients include sodium acetate trihydrate, glacial acetic acid, arginine hydrochloride, and polysorbate 20 in Water for Injection at a pH of approximately 4.8. Using the World Health Organization's natural IFN  $\beta$  standards, 30  $\mu$ g of IFN  $\beta$ -1a contains approximately 6 million International Units of antiviral activity. The activity against other standards is not known.

### **6.8.2.2. Interferon $\beta$ -1a (Avonex) Storage**

The Avonex Prefilled Syringes and Avonex Pens (autoinjectors) must be stored in a secured location at 2°C to 8°C (36°F to 46°F) and must not be frozen. The Avonex Prefilled Syringes and Avonex Pens should not be exposed to temperatures such as those found in a hot car or glove compartment. One Avonex Prefilled Syringe or Avonex Pen (autoinjector) should be taken out of the refrigerator approximately 30 minutes prior to use to warm up to room temperature.

The contents of the study treatment label will be in accordance with all applicable regulatory requirements. Avonex should not be used after the expiration, expiry, or use by date.

To ensure that the most up-to-date procedures are followed when storing Avonex for clinical use, follow the instructions provided in the current prescribing information that is included in the Pharmacy Manual for reference.

CONFIDENTIAL

The information contained herein may not be used, disclosed, or published without the written consent of Biogen MA Inc.

### 6.8.2.3. Interferon $\beta$ -1a (Avonex) Handling and Disposal

The study site must maintain accurate records demonstrating dates and amount of Avonex received, to whom dispensed (subject by subject accounting), and accounts of any Avonex accidentally or deliberately destroyed.

All Avonex Prefilled Syringes and Avonex Pens, both used and unused, must be saved for study treatment accountability. At the end of the study, reconciliation must be made between the amount of Avonex supplied, dispensed, destroyed, or subsequently returned to Biogen. A written explanation must be provided for any discrepancies.

## 6.9. Part 1 Efficacy Assessments

### 6.9.1. MRI Efficacy Assessments

The following MRI tests/assessments will be performed to assess the efficacy of BG00012:

- Brain MRI parameters will include the following:
  - new or newly enlarging T2 hyperintense lesions
  - total Gd-enhancing lesions
  - new T1 hypointense lesions

The MRIs will be forwarded to an independent, blinded, central MRI center for assessment. Each site must perform a test scan prior to enrollment of study subjects at that site.

See Section 4 for the timing of assessments.

### 6.9.2. Clinical Efficacy Assessments

The following clinical tests/assessments will be performed to assess the efficacy of BG00012:

- Relapse assessment: The assessment of protocol-defined relapses, which are defined as new or recurrent neurologic symptoms not associated with fever or infection, lasting at least 24 hours, and accompanied by new objective neurological findings upon examination by the *treating* neurologist, that are confirmed upon evaluation by the *examining* neurologist. New or recurrent neurologic symptoms that evolve gradually over months should be considered disability progression, not an acute relapse, and should not be treated with steroids. New or recurrent neurologic symptoms that occur less than 30 days following the onset of a protocol-defined relapse should be considered part of the same relapse and should not be treated with IVMP within the protocol.
- EDSS scores

CONFIDENTIAL

The information contained herein may not be used, disclosed, or published without the written consent of Biogen MA Inc.



- BVMT-R scores
- SDMT scores
- School progression query

See Section 4 for the timing of assessments.

Subjects who suspect they are experiencing a relapse (new symptoms or worsening symptoms) need to telephone or have their caregiver telephone the *treating* neurologist or *treating* nurse as soon as possible and within 48 hours of the onset of the symptoms. The following tests and evaluations are to be performed by the required study personnel:

- *treating* neurologist/*treating* nurse (as soon as possible and within 72 hours of the onset of symptoms)
  - determination of whether or not a relapse may have occurred, and refer to the *examining* neurologist, if warranted
  - monitoring/recording of concomitant medications
  - monitoring/recording of AEs
- *examining* neurologist (as soon as possible and within 5 days of the onset of symptoms)
  - EDSS

Determination of EDSS scores is to be performed as soon as possible and within 5 days of the onset of symptoms by the required study personnel, as described in the Flow Diagram for Relapse Evaluation (Figure 4).

CONFIDENTIAL

The information contained herein may not be used, disclosed, or published without the written consent of Biogen MA Inc.

**Figure 4: Flow Diagram for Relapse Evaluation**

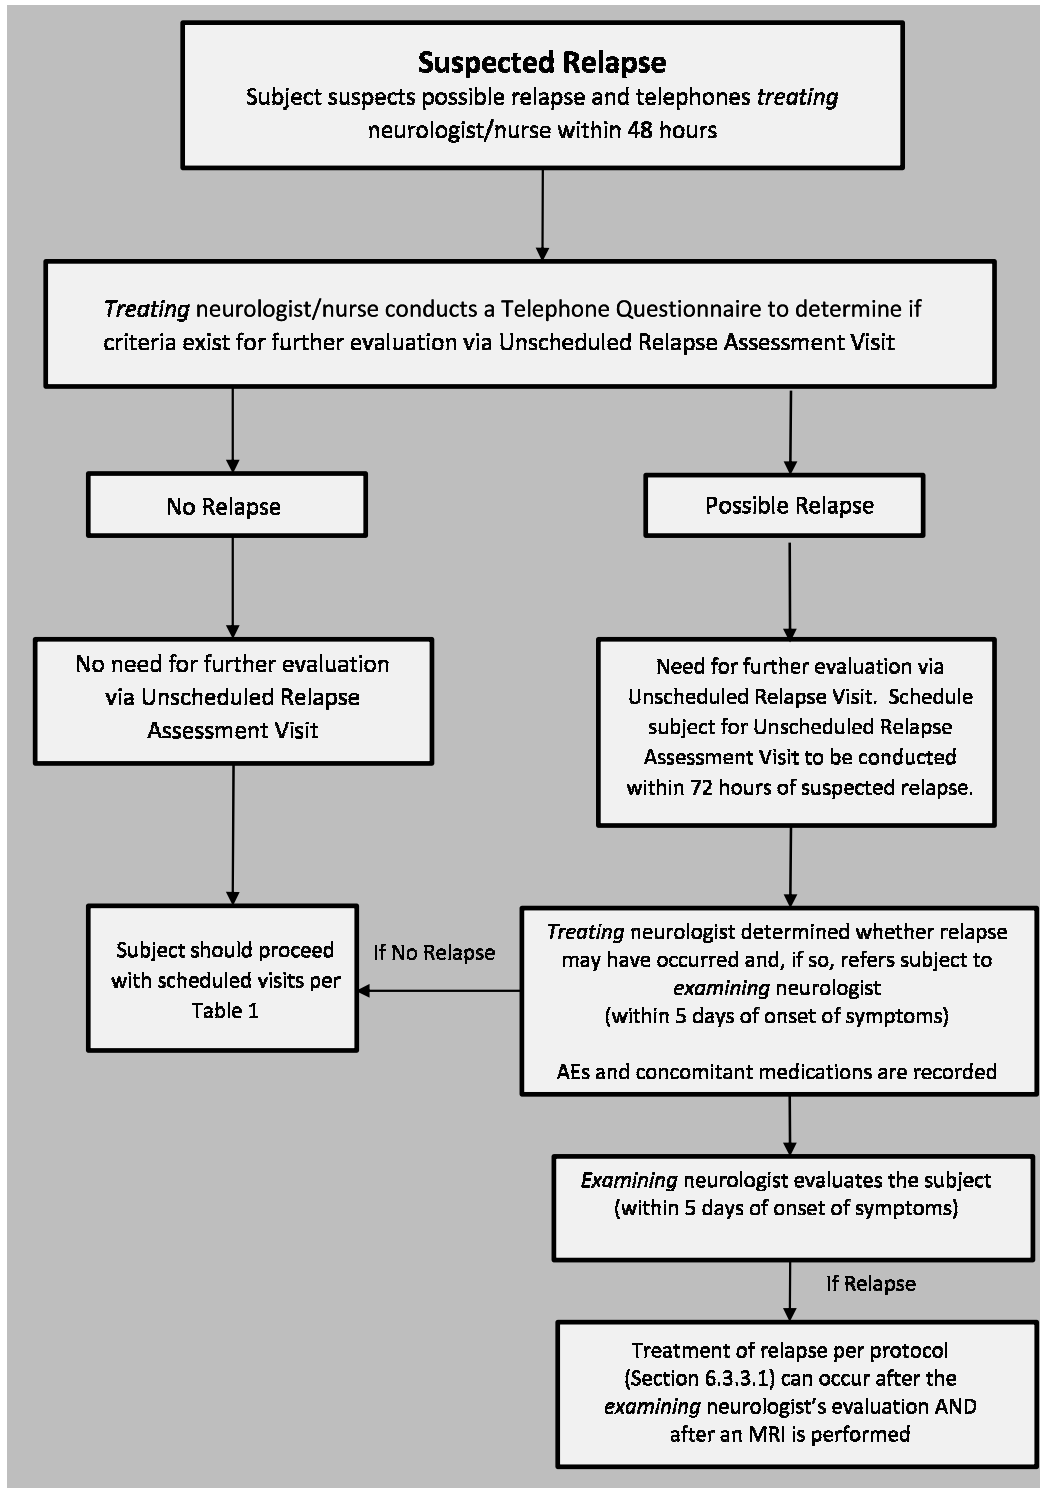

Note: All steps should be performed as soon as possible and within the specified duration from the onset of symptoms.

CONFIDENTIAL

The information contained herein may not be used, disclosed, or published without the written consent of Biogen MA Inc.

### **6.9.3. Additional Assessments**

- PedsQL Multidimensional Fatigue Scale scores
- PedsQL scores
- Telephone questionnaire to determine the necessity of an Unscheduled Relapse Assessment Visit

## **6.10. Part 1 Safety Assessments**

### **6.10.1. Clinical Safety Assessments**

The following clinical assessments will be performed to assess the safety profile of BG00012:

- AEs and SAEs monitoring (Section 8)
- concomitant therapy and procedure monitoring
- physical examinations, including body weight, height, and Tanner Score (Information regarding Tanner staging will be collected at baseline for all male subjects and for female subjects who are premenarche and will be stopped once the subject's bone age reaches  $\geq 16$  years or once the subject is postmenarche.)
- vital sign measurements: body temperature, heart rate, systolic and diastolic blood pressure, and respiratory rate
- 12-lead ECG readings

See Section 4 for the timing of assessments.

### **6.10.2. Laboratory and Radiological Safety Assessments**

Safety will be monitored through the following:

- Gd-enhanced brain MRIs for relapses
- X-ray of the left hand and wrist to determine bone age will be performed at baseline for all male subjects and for female subjects who are premenarche (if permitted by local regulatory authority) until the subject has reached bone age of  $\geq 16$  years or once the subject is postmenarche
- hematology: hemoglobin, hematocrit, red blood cell count, WBC count (with differential), and platelet count

CONFIDENTIAL

The information contained herein may not be used, disclosed, or published without the written consent of Biogen MA Inc.

- blood chemistry: sodium, potassium, chloride, total bilirubin, alkaline phosphatase, ALT, AST, GGT, BUN, creatinine, bicarbonate, calcium, magnesium, phosphate, uric acid, and glucose
- coagulation: partial thromboplastin time, prothrombin time, and international normalized ratio
- urine pregnancy test
- endocrine tests (until the subject has reached bone age of  $\geq 16$  years or until the subject is postmenarche): insulin-like growth factor 1, insulin-like growth factor binding protein, follicle-stimulating hormone, luteinizing hormone, estradiol, and testosterone
- urinalysis: color, specific gravity, pH, protein, glucose, blood, ketones, and microscopy

See Section 4 for the timing of assessments.

CONFIDENTIAL

The information contained herein may not be used, disclosed, or published without the written consent of Biogen MA Inc.

## 7. PART 2

### 7.1. Part 2 Objectives

The primary objective of Part 2 is to evaluate the long-term safety of BG00012 in subjects who completed Week 96 in Part 1 of Study 109MS306. The secondary objective of Part 2 is to describe the long-term MS outcomes of BG00012 in subjects who completed Week 96 in Part 1 of Study 109MS306.

### 7.2. Part 2 Endpoints

#### 7.2.1.1. Primary Endpoint

The primary endpoint of Part 2 is the incidence of AEs, SAEs, and discontinuations of BG00012 due to an AE.

#### 7.2.1.2. Secondary Endpoints

Secondary endpoints include annualized relapse rate; EDSS; cognition as measured by BVMT-R, SDMT, and school progression query; vital signs; ECGs; clinical laboratory data; changes from baseline in height, weight, and bone age; and Tanner stage.

### 7.3. Part 2 Study Design

#### 7.3.1. Overview

Part 2 will be an optional open-label extension phase for subjects who complete Week 96 in Part 1 and who meet the Part 2 entry criteria. Part 2 will allow for the collection of long-term (approximately 5 years) safety and MS outcomes in subjects with RRMS treated with BG00012. Results from Part 2 will be reported separately from Part 1. In Part 2, subjects (excluding those who have stopped taking BG00012 and are continuing follow-up of lymphopenia) will receive open-label BG00012, 240 mg BID, orally, for 240 weeks.

Subjects who have discontinued BG00012 and are participating in Part 2 for follow-up lymphocyte monitoring will not be required to undergo study procedures other than the monitoring of lymphocytes and relevant safety assessments (i.e., AE collection, vital signs, and physical examination). All other routine study assessments are optional for this subset of subjects. They will be followed in Part 2 every 4 weeks for the 24 weeks following the discontinuation of BG00012, then every 12 weeks (**or sooner, if clinically indicated or at the Investigator's discretion**) until the lymphocyte count is >LLN, for at least 48 weeks following BG00012 treatment discontinuation, or until initiation of another MS disease modifying therapy, whichever occurs first.

CONFIDENTIAL

The information contained herein may not be used, disclosed, or published without the written consent of Biogen MA Inc.

See [Figure 2](#) for a schematic of the study design. A final CSR will be written at the end of Part 2.

### **7.3.2. Overall Part 2 Duration and Follow-Up**

Part 2 will have a duration of approximately 5 years, consisting of a 240-week Treatment Period and a Safety Follow-Up Visit no later than 4 weeks after the last dose of study treatment. An Unscheduled Relapse Assessment Visit and Lymphocyte Follow-Up Visit will be performed as necessary.

#### **7.3.2.1. Day 1 of Part 2 (Part 1 Week 96)**

Subjects (or their legally authorized representative [e.g., parent or legal guardian], where applicable) must provide informed consent before any Part 2 baseline tests are performed (see [Section 10.3](#)). When a subject signs the ICF for Part 2 of the study, that subject is considered to be enrolled in Part 2. Subjects who have a nonclinically significant out-of-range laboratory result at Week 84 may be retested 1 time only, at the discretion of the Investigator. Participating study sites are required to document all subjects initially considered for inclusion in Part 2 of the study. If a subject is excluded from Part 2 of the study, the reasons for exclusion will be documented in the subject's eCRF.

Any subject treated with BG00012 in Part 1 with a lymphocyte count <LLN being followed at the Part 1 Week 96 Visit (including subjects who completed, are temporarily withholding, or permanently discontinued BG00012 treatment) will continue follow-up within Part 2 of the study.

#### **7.3.2.2. Treatment**

Beginning at Week 96, all subjects (excluding those who have stopped taking BG00012 and are continuing follow-up of lymphopenia) will receive BG00012, 240 mg BID, orally, for 240 weeks. Subjects who were randomized to receive IFN  $\beta$ -1a (Avonex) in Part 1 of the study will receive a starting dose of BG00012, 120 mg BID, orally, for 7 days followed by the maintenance dose of BG00012 240 mg BID, orally, for the remainder of the study.

#### **7.3.2.3. Post-Treatment**

Subjects will return to the study site for the End of Study Visit (Week 336).

Subjects who prematurely withdraw from the study should complete all study assessments for the End of Study Visit at the time of withdrawal.

#### **7.3.2.4. Follow-Up**

Subjects who complete or prematurely withdraw from the study should be encouraged to complete the study assessments for the Safety Follow-Up Visit no later than Week 340 or 4 weeks after the last dose of study treatment, whichever occurs sooner.

CONFIDENTIAL

The information contained herein may not be used, disclosed, or published without the written consent of Biogen MA Inc.

Subjects who complete, temporarily withhold, or permanently discontinue study treatment for any reason and have a lymphocyte count  $<LLN$  will be followed every 4 weeks for 24 weeks, then every 12 weeks (**or sooner, if clinically indicated or at the Investigator's discretion**) until the lymphocyte count is  $\geq LLN$ , for at least 48 weeks following BG00012 treatment discontinuation, or until initiation of another MS disease modifying therapy, whichever occurs first (see Section 7.6.4).

### **7.3.3. Relapses**

Refer to Section 6.3.3.

#### **7.3.3.1. Treatment of Relapses on Scheduled or Unscheduled Visits**

Treatment of relapses in Part 2 will be the same as in Part 1 (see Section 6.3.3.1).

### **7.3.4. Study Stopping Rules**

Biogen may terminate this study (Parts 1 and/or 2) at any time, after informing Investigators. Investigators will be notified by Biogen or designee if the study is placed on hold, completed, or closed.

### **7.3.5. End of Study**

The end of study is last subject, last visit for final collection of data for the primary outcome in Part 2.

## **7.4. Part 2 Selection of Subjects**

### **7.4.1. Inclusion Criteria**

To be eligible to participate in this study, candidates must meet the following eligibility criteria at their Week 96 Visit or at the timepoint specified in the individual eligibility criterion listed:

1. Ability of parents, legal guardians, and/or subjects to understand the purpose and risks of the study and provide signed and dated informed consent and authorization to use confidential health information in accordance with national and local subject privacy regulations. Subjects will provide assent in addition to the parental or guardian consent, as appropriate, per local regulations.
2. Subjects who completed Part 1 (Week 96 Visit), as per protocol.

Note: Any subject treated with BG00012 in Part 1 with a lymphocyte count  $<LLN$  being followed at the Part 1 Week 96 Visit (including subjects who completed, are temporarily withholding, or permanently discontinued BG00012 treatment) will continue follow-up within Part 2 of the study.

CONFIDENTIAL

The information contained herein may not be used, disclosed, or published without the written consent of Biogen MA Inc.

3. Subjects of childbearing potential who are sexually active must be willing to practice effective contraception during the study and be willing and able to continue contraception for at least 30 days after their final dose of study treatment. For further details of contraceptive requirements for this study, please refer to Section 8.5.3.

#### 7.4.2. Exclusion Criteria

Candidates will be excluded from study entry if any of the following exclusion criteria exist at their Part 1 Week 96 Visit or at the timepoint specified in the individual criterion listed:

1. Unwillingness or inability to comply with study requirements, including the presence of any condition (physical, mental, or social) that is likely to affect the subject's ability to comply with the protocol.
2. Any significant changes in medical history occurring after enrollment in Part 1, including laboratory test abnormalities or current clinically significant conditions that, in the opinion of the Investigator, would have excluded the subject's participation in Part 1. The Investigator must re-assess the subject's medical fitness for participation and consider any factors that would preclude treatment.
3. Subjects who could not tolerate BG00012 in Part 1.
4. History of malignancy.
5. History of severe allergic or anaphylactic reactions or known drug hypersensitivity to DMF or fumaric acid esters.
6. Subjects who received Avonex in Part 1 and have any of the following abnormal blood test results at Week 84:
  - ALT  $\geq 2$  times the ULN
  - AST  $\geq 2$  times the ULN
  - Gamma-glutamyl-transferase  $\geq 2$  times the ULN
  - Leukocytes  $< 3500/\text{mm}^3$
  - Eosinophils  $> 0.7 \times 10^3/\mu\text{L}$  or  $> 0.7 \text{ GI/L}$
  - Absolute lymphocyte count  $< \text{LLN}$
7. Subjects who were required to permanently discontinue BG00012 in Part 1 of the study, with the exception of subjects with lymphocyte count remaining  $< \text{LLN}$  at the End of Part 1 (Week 96 Visit) who will continue follow-up in Part 2 of the study.

CONFIDENTIAL

The information contained herein may not be used, disclosed, or published without the written consent of Biogen MA Inc.



8. Female subjects considering becoming pregnant or breastfeeding while in the study or who are pregnant or breastfeeding.
9. Other unspecified reasons that, in the opinion of the Investigator or Biogen, make the subject unsuitable for enrollment.

## **7.5. Part 2 Enrollment Procedures**

### **7.5.1. Enrollment and Baseline Assessments**

Subjects must provide consent before any Part 2 baseline tests or assessments are performed. At the time of consent, the subject will be enrolled into Part 2 of the study. Participating study sites are required to document all subjects initially considered for inclusion into Part 2 of the study. If a subject is excluded from the study, the reasons for exclusion will be documented in the subject's eCRF.

## **7.6. Part 2 Treatment of Subjects**

Refer to Section 6.6 for details.

### **7.6.1. Study Treatment Schedule and Administration**

BG00012 will be taken orally. Subjects will take 2 capsules orally at a dose of 240 mg BID. Subjects who were randomized to receive IFN  $\beta$ -1a (Avonex) in Part 1 of the study will receive a starting dose of BG00012 120 mg BID, orally, for 7 days followed by the maintenance dose of BG00012 240 mg BID, orally, for the remainder of the study.

Refer to Section 6.6.1.1 for details of BG00012 administration.

### **7.6.2. Treatment Precautions**

Treatment precautions observed in Part 1 of the study should also be observed in Part 2 (see Section 6.6.2).

### **7.6.3. Modification of Dose and/or Treatment Schedule for BG00012**

Rules for the modification of treatment dose/schedule in Part 2 are the same as in Part 1 (see Section 6.6.3).

Subjects at the end of Part 1 for whom BG00012 is being temporarily withheld on the basis of abnormal laboratory values (in accordance with Table 8) should continue to have BG00012 withheld and the laboratory tests repeated, as specified for Part 1. If the abnormal laboratory findings fail to reach the target values specified in Table 8 within 4 weeks, then BG00012 should be permanently discontinued.

CONFIDENTIAL

The information contained herein may not be used, disclosed, or published without the written consent of  
Biogen MA Inc.

#### **7.6.4. Treatment Schedule for Subjects With Abnormal Lymphocyte Count**

##### **7.6.4.1. Schedule in Part 2 for Subjects With Lymphocyte Count <LLN**

Subjects who received BG00012 in Part 1 and enter Part 2 with a lymphocyte count <LLN must be managed in accordance with [Table 9](#) (see Section [6.6.4.1](#)).

##### **7.6.4.2. Schedule for Subjects Who Complete, Temporarily Withhold, or Permanently Discontinue BG00012 for Any Reason and Have a Lymphocyte Count <LLN**

Subjects who complete, temporarily withhold, or permanently discontinue study treatment (or are being followed) with a lymphocyte count <LLN at the Part 1 Week 96 Visit will continue follow-up within Part 2 of the study.

In Part 2, the schedule for subjects who complete, temporarily withhold, or permanently discontinue study treatment for any reason and have a lymphocyte count <LLN in Part 1 is detailed in [Figure 3](#) (Section [6.6.4.2](#)) and [Table 4](#) (Section [4.2](#)).

#### **7.6.5. Treatment Compliance**

Compliance in Part 2 will be monitored and recorded as in Part 1 (see Section [6.6.5](#)).

#### **7.6.6. Concomitant Therapy and Procedures**

Guidelines for concomitant therapy and procedures in Part 2 are the same as those in Part 1 (see Section [6.6.6](#)).

### **7.7. Part 2 Withdrawal of Subjects From Study Treatment and/or the Study**

Guidelines for discontinuation of BG00012 treatment or withdrawal of subjects from the study in Part 2 are the same as those in Part 1 (see Section [6.7](#)), with the following exceptions:

- Subjects who permanently discontinue BG00012 and have a lymphocyte count greater than or equal to the lower limit of normal (LLN) will be withdrawn from the study after the Safety Follow-Up Visit (see Section [7.3.2.4](#))
- Subjects who permanently discontinue BG00012 and have a lymphocyte count less than LLN will be followed every 4 weeks for 24 weeks, then every 12 weeks (**or sooner, if clinically indicated or at the Investigator's discretion**) until the lymphocyte count is  $\geq$ LLN, for at least 48 weeks following BG00012 treatment discontinuation, or until initiation of another MS disease modifying therapy, whichever occurs first. If the lymphocyte count does not recover after 48 weeks, the treating neurologist should contact the Medical Monitor.

CONFIDENTIAL

The information contained herein may not be used, disclosed, or published without the written consent of Biogen MA Inc.

All subjects that permanently discontinue BG00012 will have the Safety Follow-Up Visit 4 weeks ( $\pm 5$  days) after last dose of BG00012.

## **7.8. Part 2 Study Treatment Management**

Management of BG00012 in Part 2 of the study is the same as in Part 1 (see Section 6.8).

## **7.9. Part 2 Efficacy Assessments**

Clinical efficacy assessments, with the exception of MRIs, will be the same as in Part 1 (see Section 6.9.2); additional assessments will be the same as in Part 1 (see Section 6.9.3).

Subjects who have discontinued BG00012 and are participating in Part 2 for follow-up lymphocyte monitoring will not be required to undergo study procedures other than the monitoring of lymphocytes and relevant safety assessments (i.e., AE collection, vital signs, and physical examination). All other routine study assessments are optional for this subset of subjects.

## **7.10. Part 2 Safety Assessments**

Safety assessments will be the same as in Part 1 (see Section 6.10) except for coagulation assessments, which will not be performed in Part 2.

Subjects who have discontinued BG00012 and are participating in Part 2 for follow-up lymphocyte monitoring will not be required to undergo study procedures other than the monitoring of lymphocytes and relevant safety assessments (i.e., AE collection, vital signs, and physical examination) [Table 4]. All other routine study assessments are optional for this subset of subjects.

CONFIDENTIAL

The information contained herein may not be used, disclosed, or published without the written consent of Biogen MA Inc.

## **8. SAFETY DEFINITIONS, MONITORING, AND REPORTING**

Throughout the course of the study, every effort must be made to remain alert to possible AEs. If an AE occurs, the first concern should be for the safety of the subject. If necessary, appropriate medical intervention should be provided.

At the signing of the ICF, each subject must be given the names and telephone numbers of study site staff for reporting AEs and medical emergencies.

### **8.1. Definitions**

#### **8.1.1. Serious Pretreatment Event**

A serious pretreatment event is any event that meets the criteria for SAE reporting (as defined in Section 8.1.3) and occurs after the subject signs the ICF, but before administration of study treatment.

#### **8.1.2. Adverse Event**

An AE is any untoward medical occurrence in a patient or clinical investigation subject administered a pharmaceutical product and that does not necessarily have a causal relationship with this treatment. An AE can therefore be any unfavorable and unintended sign (including an abnormal laboratory finding), symptom, or disease temporally associated with the use of a medicinal (investigational) product, whether or not related to the medicinal (investigational) product. Additionally, AEs are defined to include laboratory abnormalities leading to treatment discontinuation.

#### **8.1.3. Serious Adverse Event**

An SAE is any untoward medical occurrence that at any dose:

- results in death
- in the view of the Investigator, places the subject at immediate risk of death (a life-threatening event); however, this does not include an event that, had it occurred in a more severe form, might have caused death
- requires inpatient hospitalization or prolongation of existing hospitalization
- results in persistent or significant disability/incapacity, or
- results in a congenital anomaly/birth defect.

CONFIDENTIAL

The information contained herein may not be used, disclosed, or published without the written consent of Biogen MA Inc.

An SAE may also be any other medically important event that, in the opinion of the Investigator, may jeopardize the subject or may require intervention to prevent one of the other outcomes listed in the definition above. (Examples of such medical events include allergic bronchospasm requiring intensive treatment in an emergency room or convulsions occurring at home that do not require an inpatient hospitalization.)

**If a subject is hospitalized due to local requirements for administration of the study treatment, the hospitalization should not be considered an SAE unless one of the requirements mentioned above is met.**

## **8.2. Monitoring and Recording Events**

### **8.2.1. Serious Pretreatment Events**

A serious pretreatment event experienced by the subject after signing and dating the ICF, but before administration of study treatment, is to be recorded on the SAE Form and faxed to Biogen Safety and Benefit-Risk Management (SABR) or designee within 24 hours of the study site staff becoming aware of the event (see Section 8.2.5).

### **8.2.2. Adverse Events**

Any AE experienced by the subject between the time of first dose of study treatment and the Safety Follow-Up Visit is to be recorded on the eCRF, regardless of the severity of the event or its relationship to study treatment.

### **8.2.3. Serious Adverse Events**

Any SAE experienced by the subject between the time of signing informed consent and the Safety Follow-Up Visit is to be recorded on an SAE Form, regardless of the severity of the event or its relationship to study treatment. SAEs must be reported to the Sponsor (or designee).

Any SAE ongoing when the subject completes the study or discontinues from the study will be followed by the Investigator until the event has resolved, stabilized, or returned to baseline status.

### **8.2.4. All Events**

All events must be assessed to determine the following:

- If the event meets the criteria for an SAE as defined in Section 8.1.3.
- The relationship of the event to study treatment as defined in Section 8.3.1.
- The severity of the event as defined in Section 8.3.2.

CONFIDENTIAL

The information contained herein may not be used, disclosed, or published without the written consent of Biogen MA Inc.

### 8.2.5. Immediate Reporting of Serious Adverse Events

In order to adhere to all applicable laws and regulations for reporting an SAE, the study site must formally notify Biogen SABR or designee within 24 hours of the study site staff becoming aware of the SAE. It is the Investigator's responsibility to ensure that the SAE reporting information and procedures are used and followed appropriately.

| Reporting Information for SAEs                                                                                                                                                                                                                                                                                                                                                                                                                                                                                                                                                                                                                                                                                                                                                                                                                                                                                                                                                                                    |
|-------------------------------------------------------------------------------------------------------------------------------------------------------------------------------------------------------------------------------------------------------------------------------------------------------------------------------------------------------------------------------------------------------------------------------------------------------------------------------------------------------------------------------------------------------------------------------------------------------------------------------------------------------------------------------------------------------------------------------------------------------------------------------------------------------------------------------------------------------------------------------------------------------------------------------------------------------------------------------------------------------------------|
| <p>Any Serious Event that occurs between the time that the subject has signed informed consent and the Safety Follow-Up Visit must be reported to Biogen SABR or designee within 24 hours of the study site staff becoming aware of the event.</p> <p>A report <b><i>must be submitted</i></b> to Biogen SABR or designee regardless of the following:</p> <ul style="list-style-type: none"><li>• whether or not the subject has undergone study-related procedures</li><li>• whether or not subject has received study treatment</li><li>• the severity of the event</li><li>• the relationship of the event to study treatment</li></ul> <p>To report initial or follow-up information on a Serious Event, fax or email a completed SAE Form to the following: QuintilesIMS Lifecycle Safety.</p> <p style="text-align: center;"><b>Fax: See the Study Reference Manual</b></p> <p style="text-align: center;">Email: PPD <span style="background-color: #00AEEF; color: white; padding: 0 20px;"> </span></p> |

#### 8.2.5.1. Deaths

Death is an outcome of an event. The event that resulted in death should be recorded and reported on the appropriate eCRF. All causes of death must be reported as SAEs. The Investigator should make every effort to obtain and send death certificates and autopsy reports to Biogen SABR or designee.

### 8.3. Safety Classifications

#### 8.3.1. Relationship of Events to Study Treatment

The following definitions should be considered when evaluating the relationship of AEs and SAEs to the study treatment:

CONFIDENTIAL

The information contained herein may not be used, disclosed, or published without the written consent of Biogen MA Inc.

| <b>Relationship of Event to Study Treatment</b> |                                                                                                                                                                                                                                                                                                                                                                                                                                                                                                                                                                                                 |
|-------------------------------------------------|-------------------------------------------------------------------------------------------------------------------------------------------------------------------------------------------------------------------------------------------------------------------------------------------------------------------------------------------------------------------------------------------------------------------------------------------------------------------------------------------------------------------------------------------------------------------------------------------------|
| Not related                                     | An AE will be considered “not related” to the use of the investigational drug if there is not a possibility that the event has been caused by the product under investigation. Factors pointing toward this assessment include, but are not limited to: the lack of reasonable temporal relationship between administration of the drug and the event, the presence of a biologically implausible relationship between the product and the AE (e.g., the event occurred before administration of drug), or the presence of a more likely alternative explanation for the AE.                    |
| Related                                         | An AE will be considered “related” to the use of the investigational drug if there is a possibility that the event may have been caused by the product under investigation. Factors that point toward this assessment include, but are not limited to: a positive rechallenge, a reasonable temporal sequence between administration of the drug and the event, a known response pattern of the suspected drug, improvement following discontinuation or dose reduction, a biologically plausible relationship between the drug and the AE, or a lack of an alternative explanation for the AE. |

### 8.3.2. Severity of Events

The following definitions should be considered when evaluating the severity of AEs and SAEs:

| <b>Severity of Event</b> |                                                                                                                                                                                                                                                   |
|--------------------------|---------------------------------------------------------------------------------------------------------------------------------------------------------------------------------------------------------------------------------------------------|
| Mild                     | Symptoms barely noticeable to subject or does not make subject uncomfortable; does not influence performance or functioning; prescription drug not ordinarily needed for relief of symptom(s) but may be given because of personality of subject. |
| Moderate                 | Symptoms of a sufficient severity to make subject uncomfortable; performance of daily activity is influenced; subject is able to continue in study; treatment for symptom(s) may be needed.                                                       |
| Severe                   | Symptoms cause severe discomfort; symptoms cause incapacitation or significant impact on subject’s daily life; severity may cause cessation of treatment with study treatment; treatment for symptom(s) may be given and/or subject hospitalized. |

### 8.3.3. Expectedness of Events

Expectedness of all AEs will be determined according to the Investigator’s Brochure.

## 8.4. Prescheduled or Elective Procedures or Routinely Scheduled Treatments

A prescheduled or elective procedure or a routinely scheduled treatment will not be considered an SAE, even if the subject is hospitalized; the study site must document all of the following:

- The prescheduled or elective procedure or routinely scheduled treatment was scheduled (or was on a waiting list to be scheduled) prior to obtaining the subject’s consent to participate in the study.

CONFIDENTIAL

The information contained herein may not be used, disclosed, or published without the written consent of Biogen MA Inc.

- The condition requiring the prescheduled or elective procedure or routinely scheduled treatment was present before and did not worsen or progress in the opinion of the Investigator between the subject's consent to participate in the study and the time of the procedure or treatment.
- The prescheduled or elective procedure or routinely scheduled treatment is the sole reason for the intervention or hospital admission.

## **8.5. Procedures for Handling Special Situations**

### **8.5.1. Overdose**

An overdose is any dose of study treatment given to a subject or taken by a subject that exceeds the dose described in the protocol. Overdoses are not considered AEs; however, all overdoses should be recorded on an Overdose Form and faxed to Biogen SABR or designee within 24 hours. An overdose should be reported even if it does not result in an AE. Overdoses do not need to be recorded in the eCRF; dosing information is recorded on the eCRF.

### **8.5.2. Medical Emergency**

In a medical emergency requiring immediate attention, study site staff will apply appropriate medical intervention, according to current standards of care. The Investigator or designee should contact the Medical Monitor at QuintilesIMS <sup>PPD</sup> [REDACTED] or, alternatively, <sup>PPD</sup> [REDACTED]

### **8.5.3. Contraception Requirements**

All subjects of childbearing potential who are sexually active must practice effective contraception during the study and be willing and able to continue contraception for 30 days after their last dose of study treatment.

For the purposes of this study, women of childbearing potential are defined as all women physiologically capable of becoming pregnant.

For the purposes of the study, effective contraception is defined as follows:

For females:

- Using 1 or more of the following acceptable methods of contraception: surgical sterilization (e.g., bilateral tubal ligation), intrauterine contraception or device, hormonal contraception, or any 2 barrier methods (a combination of male or female condom with spermicide; diaphragm, sponge, cervical cap).
- Abstinence can be considered an acceptable method of contraception at the discretion of the Investigator. Periodic abstinence (e.g., calendar, ovulation, symptothermal,

CONFIDENTIAL

The information contained herein may not be used, disclosed, or published without the written consent of  
Biogen MA Inc.



post-ovulation methods) and withdrawal are not considered acceptable methods of contraception.

For males:

- Effective male contraception includes a vasectomy with negative postvasectomy semen analysis, or the use of condoms with spermicide.
- Abstinence can be considered an acceptable method of contraception at the discretion of the Investigator.

#### **8.5.4. Pregnancy**

Subjects should not become pregnant during the study. If a female subject becomes pregnant, study treatment must be discontinued immediately. The Investigator must report the pregnancy by faxing the appropriate form within 24 hours of the study site staff becoming aware of the pregnancy to QuintilesIMS Lifecycle Safety (fax: see the Study Reference Manual; email PPD [REDACTED]).

The Investigator or study site staff must report the outcome of the pregnancy to QuintilesIMS Lifecycle Safety.

Note that congenital abnormalities/birth defects in the offspring of male or female subjects should be reported if conception occurred during the study treatment period.

#### **8.5.5. Regulatory Reporting**

Suspected unexpected serious adverse reactions (SUSARs) are SAEs that are unexpected and judged by the Investigator or the Sponsor to be related to the study treatment administered.

Biogen SABR (or designee) will report SUSARs to the appropriate regulatory authorities and Investigators as required, according to local law.

### **8.6. Investigator Responsibilities**

The Investigator's responsibilities include the following:

- Monitor and record all AEs, including SAEs, regardless of the severity or relationship to study treatment.
- Determine the seriousness, relationship, and severity of each event.
- Determine the onset and resolution dates of each event.
- Monitor and report all pregnancies and follow up on and report the outcome of the pregnancy.

CONFIDENTIAL

The information contained herein may not be used, disclosed, or published without the written consent of Biogen MA Inc.

- Complete an SAE Form for each serious event and fax it to Biogen SABR or designee within 24 hours of the study site staff becoming aware of the event.
- Pursue SAE follow-up information actively and persistently. Follow-up information must be reported to Biogen SABR or designee within 24 hours of the study site staff becoming aware of new information.
- Ensure all AE and SAE reports are supported by documentation in the subjects' medical records.
- Report SAEs to local ethics committees (ECs), as required by local law.

### **8.7. Biogen Responsibilities**

Biogen's responsibilities include the following:

- Before study site activation and subject enrollment, the Clinical Monitor or designee is responsible for reviewing with study site staff the definitions of AE and SAE, as well as the instructions for monitoring, recording, and reporting AEs and SAEs.
- Biogen is to notify all appropriate regulatory authorities, central ECs, and Investigators of SAEs, as required by local law, within required time frames.

CONFIDENTIAL

The information contained herein may not be used, disclosed, or published without the written consent of Biogen MA Inc.

## **9. STATISTICAL METHODS AND DETERMINATION OF SAMPLE SIZE**

### **9.1. Part 1**

#### **9.1.1. Description of Objectives**

See Section 6.1 for the objectives of Part 1.

#### **9.1.2. Description of Endpoints**

See Section 6.2 for the primary, secondary, and exploratory endpoints of Part 1.

#### **9.1.3. Demography and Baseline Disease Characteristics**

Demographics and baseline characteristics will be summarized using descriptive statistics for each treatment group and overall.

If there are clinically relevant imbalances in important baseline characteristics, appropriate statistical methods will be used to analyze the endpoint (e.g., logistic regression) to adjust for the baseline covariates. Summary statistics and 95% confidence intervals (CIs) will be presented from the model.

#### **9.1.4. Efficacy**

##### **9.1.4.1. Analysis Population**

Intent-to-Treat (ITT) Population: subjects who were randomized and received at least 1 dose of study treatment.

Completers Population: subjects from the ITT Population who completed Week 96 of the study and who have MRI data for Week 96.

##### **9.1.4.2. General Methods of Analysis**

In general, continuous variables will be summarized using summary statistics (mean, standard deviation [SD], median, minimum, and maximum) by treatment group, and categorical variables will be presented using frequency distributions by treatment group. Where appropriate, 95% CIs for mean, median, or proportions may also be presented. In addition, statistical modeling may be used to analyze the data. Binary outcomes may be analyzed by the logistic regression model. In general, the number of new or newly enlarging T2 lesions and new T1 hypointense lesions (i.e., new nonenhancing T1 hypointense lesions) or number of relapses will be analyzed by the negative binomial regression model. The number of Gd-enhancing lesions will be analyzed using the ordinal logistic regression model or Wilcoxon rank-sum test. Continuous responses

CONFIDENTIAL

The information contained herein may not be used, disclosed, or published without the written consent of Biogen MA Inc.

(such as Quality of Life measures) will be analyzed by analysis of variance or analysis of covariance (ANCOVA). Time to first relapse or time to 12-week confirmed EDSS progression will be presented based on the Kaplan-Meier method and analyzed using the Cox proportional hazards model. The stratification factor (i.e., IFN  $\beta$ -1a or glatiramer acetate treatment in 4 weeks prior to study entry age group) will be included in the statistical model. Other baseline covariates, if included in the model, will be specified in the Statistical Analysis Plan (SAP). An additional, separate efficacy analysis will be carried out based on pubertal status at disease initiation.

#### **9.1.4.3. Primary Endpoint Analysis**

Primary endpoint: proportion of subjects free of new or newly enlarging T2 lesions at Week 96.

The primary analysis of the primary endpoint will include the following:

- Data will be presented as descriptive statistics (e.g., mean, SD, median) and CIs. The CIs for the proportion of subjects free of new or newly enlarging T2 lesions at Week 96 for each treatment group will be presented.
- Data will be summarized using observed values. No special method will be used to handle missing information.

The primary analysis of the primary endpoint will be performed on the Completers Population.

A sensitivity analysis of the primary endpoint will be performed on the ITT Population. For this analysis, missing values may be imputed. A logistic regression model may be used to analyze the proportion of subjects free of new or newly enlarging T2 lesions, adjusted for age group and other baseline covariates. Details will be described in the SAP.

#### **9.1.4.4. Secondary Endpoints Analysis**

Key secondary endpoint: number of new or newly enlarging T2 hyperintense lesions at Week 24.

Summary statistics for the number of lesions will be presented by treatment group. A negative binomial regression model will be used to analyze the number of new or newly enlarging T2 hyperintense lesions at Week 24, with treatment group in the model and adjusted for randomization stratification factors (age group and IFN  $\beta$ -1a or glatiramer acetate use in the 4 weeks prior to study entry) and baseline number of T2 lesions. Formal statistical testing will be performed to compare the mean between the 2 treatment groups. Details will be described in the SAP. The analysis will be based on subjects from the ITT Population who have observed data at Week 24. An additional sensitivity analysis based on all subjects from the ITT Population may also be performed. Missing value imputation may be performed for this analysis. The number of new or newly enlarging T2 hyperintense lesions at other timepoints will be analyzed in a similar way.

CONFIDENTIAL

The information contained herein may not be used, disclosed, or published without the written consent of Biogen MA Inc.

### **Additional Secondary Endpoints:**

Analyses of other secondary efficacy endpoints will be based on subjects from the Completers Population. An additional analysis based on the ITT Population may also be conducted.

#### ***Number of New or Newly Enlarging T2 Hyperintense Lesions at Week 96***

Summary statistics will be presented for each treatment group. A negative binomial regression model similar to that described for the number of lesions at Week 24 will be implemented.

#### ***Proportion of Subjects Free of New or Newly Enlarging T2 Hyperintense Lesions on Brain MRI Scans at Weeks 24 and 48***

Summary statistics will be presented for each treatment group. Additionally, this endpoint may be analyzed using logistic regression, adjusted for baseline number of T2 lesions and age group.

#### ***Proportion of Subjects Free of New MRI Activity (i.e., Free of Gd-enhancing and Free of New or Newly Enlarging T2 MRI Lesions on Brain MRI Scans) at Weeks 24, 48, and 96***

Summary statistics will be presented for each treatment group. Additionally, this endpoint may be analyzed using logistic regression, adjusted for baseline number of Gd-enhancing lesions, and/or T2 lesions and age group.

#### ***Time to First Relapse***

Time to first relapse and estimated proportion of subjects relapsed will be presented based on the Kaplan-Meier method. Time to first relapse may also be analyzed using the Cox proportional hazards model, adjusted for baseline relapse rate, baseline EDSS score, and age group.

#### ***Proportion of Subjects Free of Relapse up to Week 96***

The proportion of subjects relapsed up to Week 96 will be summarized. In addition, for the ITT Population, the estimated proportion of subjects who are relapse-free up to Week 96 may be calculated based on the Kaplan-Meier method.

#### ***Annualized Relapse Rate at Weeks 48 and 96***

ARR will be analyzed based on negative binomial regression, adjusted for baseline relapse rate, baseline EDSS score and age group.

#### ***Fatigue as Measured by the PedsQL Multidimensional Fatigue Scale Scores and Quality of Life as Measured by the PedsQL***

Summary statistics will be presented for each treatment group. Additionally, these 2 endpoints will be analyzed using an ANCOVA, adjusted for baseline score and age group.

CONFIDENTIAL

The information contained herein may not be used, disclosed, or published without the written consent of  
Biogen MA Inc.

### ***Change From Baseline to Week 96 in the EDSS Score***

Summary statistics of change from baseline to Week 96 in EDSS score will be presented for each treatment group.

Analysis methods for other secondary endpoints (safety endpoints) are described in Section 9.1.5.

The general analysis method for each type of endpoint has been described in Section 9.1.4.2.

#### **9.1.4.5. Exploratory Endpoints Analysis**

Analysis methods for exploratory efficacy endpoints will be similar to those described for the secondary endpoint. See Section 9.1.4.2 or Section 9.1.5 for the analysis method for each endpoint. BVMT-R, SDMT, and school progression query will be summarized for each treatment group using descriptive statistics by visit.

#### **9.1.5. Safety**

##### **9.1.5.1. Analysis Population**

The Safety Population is defined as subjects who received at least 1 dose of study treatment.

##### **9.1.5.2. Methods of Analysis**

###### **9.1.5.2.1. Adverse Events**

AEs will be coded using the Medical Dictionary for Regulatory Activities.

All AEs, laboratory abnormalities, ECG, and vital signs will be evaluated for safety. Incidence of AEs will be summarized for each treatment group. Other safety data will also be summarized by treatment group.

###### **9.1.5.2.2. Clinical Laboratory Abnormalities**

Clinical laboratory evaluations include hematology, blood chemistry, and urinalysis. Shifts in laboratory assessments will be summarized for each treatment group. Summary of quantitative laboratory values and change from baseline values may also be presented. Additionally, lymphocyte count over time (including recovery from lymphocyte counts <LLN) will be summarized using descriptive statistics.

###### **9.1.5.2.3. Vital Signs**

The analysis of vital signs will focus on clinically relevant abnormalities.

The definitions of these clinically relevant abnormalities are shown in [Table 10](#).

CONFIDENTIAL

The information contained herein may not be used, disclosed, or published without the written consent of Biogen MA Inc.

**Table 10: Criteria to Determine Clinically Relevant Abnormalities in Vital Signs**

| <b>Vital Sign</b>        | <b>Criteria for Abnormalities</b>                                                                                     |
|--------------------------|-----------------------------------------------------------------------------------------------------------------------|
| Body Temperature         | >38°C or an increase from baseline of $\geq 1^\circ\text{C}$                                                          |
| Heart Rate               | >120 beats per minute (bpm) or an increase from baseline of >20 bpm<br><50 bpm or a decrease from baseline of >20 bpm |
| Systolic Blood Pressure  | >180 mmHg or an increase from baseline of >40 mmHg<br><90 mmHg or a decrease from baseline of >30 mmHg                |
| Diastolic Blood Pressure | >105 mmHg or an increase from baseline of >30 mmHg<br><50 mmHg or a decrease from baseline of >20 mmHg                |
| Respiratory Rate         | <10 or >30 breaths per minute after taking dose                                                                       |

### 9.1.6. Sample Size Considerations

The study is not powered for the primary endpoint of Part 1. The sample size is primarily based on feasibility, with the goal of having 50 evaluable subjects at the 96-week timepoint of Part 1 for each treatment group.

Based on an estimated dropout rate of approximately 30% over 2 years, a total of 142 subjects will need to be enrolled to have at least 100 evaluable subjects (50 subjects/treatment group) after 2 years of treatment.

With respect to the primary endpoint of Part 1, if the proportion of subjects free of new or newly enlarging T2 hyperintense lesions is approximately 25%, the width of the 95% CI for the proportion will be approximately 0.24. If the proportion is around 40%, the width of the 95% CI will be approximately 0.28.

This sample size will provide approximately 82% power for the key secondary endpoint of Part 1 of number of new or newly enlarging T2 hyperintense lesions at Week 24. The assumptions were based on historical data on treatment effect for IFN  $\beta$ -1a (Avonex) and BG00012 on the number of T2 hyperintense lesions compared with placebo.

It is assumed that the mean (SD) will be 3.5 (6.3) and 1.22 (2.92) for the number of new or newly enlarging T2 hyperintense lesions at Week 24 for the IFN  $\beta$ -1a (Avonex) group and the BG00012 group, respectively (a 65% reduction over the IFN  $\beta$ -1a group). At Week 24, a 10% dropout rate is expected, resulting in about 63 evaluable subjects per group. Based on these assumptions, the study will have approximately 82% power to detect the difference between BG00012 and IFN  $\beta$ -1a. This power calculation is based on a negative binomial simulation.

CONFIDENTIAL

The information contained herein may not be used, disclosed, or published without the written consent of Biogen MA Inc.

## **9.2. Part 2**

### **9.2.1. Description of Objectives**

See Section 7.1 for the objectives of Part 2.

### **9.2.2. Description of Endpoints**

See Section 7.2 for the primary and secondary endpoints of Part 2.

#### **9.2.2.1. General Methods of Analysis**

In general, continuous variables will be summarized using summary statistics (mean, standard deviation [SD], median, minimum, and maximum), and categorical variables will be presented using frequency distributions. Where appropriate, 95% CIs for mean, median, or proportions may also be presented.

The primary analysis of the primary endpoint of Part 2 will be summaries of the incidence of treatment-emergent AEs, SAEs, and discontinuations from study treatment due to AEs. Analysis of the secondary endpoints in Part 2 will include summaries of ARR; summaries of changes from baseline in EDSS, SDMT, and BVMT-R scores, and school progression query; summaries of the incidence of clinically relevant vital signs, ECG, and laboratory abnormalities; summaries of changes from baseline in height, weight, and bone age; and summaries over time of Tanner stage. Data will be summarized for the overall population as well as separately for pre- and post-pubertal subjects.

### **9.2.3. Demography and Baseline Disease Characteristics**

Demographics and baseline characteristics will be summarized using descriptive statistics.

### **9.2.4. Efficacy**

#### **9.2.4.1. Analysis Population**

Intent-to-Treat (ITT) Population: subjects who received at least 1 dose of study treatment.

### **9.2.5. Safety**

Safety analyses will be as in Part 1 of the study (see Section 9.1.5).

### **9.2.6. Interim Analyses**

The data from Part 2 of this study will be summarized periodically to support regulatory submissions or when further information on the long-term safety and efficacy of BG00012 in the pediatric population is required.

CONFIDENTIAL

The information contained herein may not be used, disclosed, or published without the written consent of Biogen MA Inc.



### **9.2.7. Sample Size Considerations**

Because Part 2 is an extension of Part 1, the sample size will be determined by the number of eligible subjects who completed Part 1 of the study.

CONFIDENTIAL

The information contained herein may not be used, disclosed, or published without the written consent of  
Biogen MA Inc.

## **10. ETHICAL REQUIREMENTS**

Biogen and the Investigator must comply with all instructions, regulations, and agreements in this protocol and applicable International Conference on Harmonisation (ICH) and Good Clinical Practice (GCP) guidelines and conduct the study according to local regulations.

### **10.1. Declaration of Helsinki**

This study will be performed in alignment with the ethical principles outlined in the Declaration of Helsinki.

### **10.2. Ethics Committee**

The Investigator must obtain EC approval of the protocol, ICF, and other required study documents prior to starting the study. The Sponsor or designee will submit documents on behalf of the investigational sites in countries other than the US.

If the Investigator makes any changes to the ICF, Biogen must approve the changes before the ICF is submitted to the EC. A copy of the approved ICF must be provided to Biogen. After approval, the ICF must not be altered without the agreement of the relevant EC and Biogen.

It is the responsibility of the Principal Investigators to ensure that all aspects of institutional review are conducted in accordance with current governmental regulations.

Biogen must receive a letter documenting EC approval, which specifically identifies the protocol, protocol number, and ICF, prior to the initiation of the study. Protocol amendments will be subject to the same requirements as the original protocol.

A progress report must be submitted to the EC at required intervals and not less than annually.

At the completion or termination of the study, the investigational site must submit a close-out letter to the EC and Biogen.

### **10.3. Subject Information and Consent**

Prior to performing any study-related activities under this protocol, including screening tests and assessments, written informed consent with the approved ICF must be obtained from the subject's parent or legal guardians, as applicable, in accordance with local practice and regulations. Written subject assent may also be obtained prior to performing any study-related activities from subjects who are able to read and understand the assent form and a brief summary of the study process, benefits, and risks.

The background of the proposed study, the procedures, the benefits and risks of the study, and that study participation is voluntary for the subject must be explained to the subject. The subject

CONFIDENTIAL

The information contained herein may not be used, disclosed, or published without the written consent of  
Biogen MA Inc.

and the subject's parents or legal guardians must be given sufficient time to consider whether to participate in the study.

A copy of the signed ICF and authorizations will be given to the parents or legal guardians. A copy of the signed assent form, if obtained, will be given to the subject. Confirmation of a subject's informed consent and assent, if appropriate, must also be documented in the subject's medical record prior to any testing under this protocol, including screening tests and assessments.

Each consent form should contain an authorization allowing the Principal Investigators and Biogen to use and disclose PHI (i.e., subject-identifiable health information) in compliance with local law.

The signed consent and assent forms will be retained with the study records.

#### **10.4. Subject Data Protection**

Prior to any testing under this protocol, including screening tests and assessments, candidates must also provide all authorizations required by local law (e.g., PHI authorization in North America).

The subject will not be identified by name in the eCRF or in any study reports, and these reports will be used for research purposes only. Biogen, its partners and designees, ECs, and various government health agencies may inspect the records of this study. Every effort will be made to keep the subject's personal medical data confidential.

#### **10.5. Compensation for Injury**

Biogen maintains appropriate insurance coverage for clinical studies and will follow applicable local compensation laws.

#### **10.6. Conflict of Interest**

The Investigators should address any potential conflicts of interest (e.g., financial interest in the Sponsor) with the subject before the subject makes a decision to participate in the study.

#### **10.7. Registration of Study and Disclosure of Study Results**

Biogen will register the study and poststudy results regardless of outcome on a publicly accessible website in accordance with the applicable laws and regulations.

CONFIDENTIAL

The information contained herein may not be used, disclosed, or published without the written consent of Biogen MA Inc.

## **11. ADMINISTRATIVE PROCEDURES**

### **11.1. Study Site Initiation**

The Investigator must not screen any subjects prior to completion of a study initiation visit, conducted by Biogen or designee. This initiation visit will include a detailed review of the protocol and study procedures.

### **11.2. Quality Assurance**

During and/or after completion of the study, quality assurance officers named by Biogen or the regulatory authorities may wish to perform on-site audits. The Investigator will be expected to cooperate with any audit and to provide assistance and documentation (including source data) as requested.

### **11.3. Monitoring of the Study**

The Principal Investigators must permit study-related monitoring by providing direct access to source data and to the subjects' medical histories.

The Clinical Monitors will visit the Investigator(s) at regular intervals during the course of the study and after the study has completed, as appropriate.

During these visits, eCRFs and supporting documentation related to the study will be reviewed and any discrepancies or omissions will be resolved.

The monitoring visits must be conducted according to the applicable ICH and GCP guidelines to ensure protocol adherence, quality of data, study treatment accountability, compliance with regulatory requirements, and continued adequacy of the investigational site and its facilities.

### **11.4. Study Funding**

Biogen is the Sponsor of the study and is funding the study. All financial details are provided in the separate contracts between the institution, Investigator, and Biogen.

### **11.5. Publications**

Details are included in the clinical trial agreement for this study.

CONFIDENTIAL

The information contained herein may not be used, disclosed, or published without the written consent of  
Biogen MA Inc.

## **12. FURTHER REQUIREMENTS AND GENERAL INFORMATION**

### **12.1. External Contract Organizations**

#### **12.1.1. Contract Research Organization**

A contract research organization (CRO), QuintilesIMS, will be responsible for administrative aspects of the study including, but not limited to, study initiation, monitoring, and management of SAE reports. Before subjects are screened at each study site, the CRO will review study responsibilities with the Investigators and other study site staff, as appropriate.

#### **12.1.2. Interactive Voice/Web Response System**

IXRS will be used in this study. Before subjects are screened or enrolled, the IXRS vendor will provide each study site with appropriate training and a user manual.

#### **12.1.3. Remote Data Capture**

Subject information will be captured and managed by study sites on eCRFs by a remote data capture (RDC) system developed and supported by RDC vendor and configured by Biogen.

#### **12.1.4. Central Laboratories for Laboratory Assessments**

A central laboratory has been selected by Biogen to analyze the safety laboratory samples collected for this study.

#### **12.1.5. Central Facility for Other Assessments**

A central facility has been selected by Biogen to read and interpret all MRIs conducted in Part 1 for this study.

### **12.2. Study Committees**

An independent Data Safety Monitoring Board (DSMB) will monitor the progress of the study, review interim safety data, and oversee the safety of subjects participating in this study. The specifics regarding the DSMB organization and procedures will be outlined in the DSMB Charter.

### **12.3. Changes to Final Study Protocol**

All protocol amendments must be submitted to the EC and Regulatory Authorities if required by local law. Protocol modifications that affect subject safety, the scope of the investigation, or the scientific quality of the study must be approved by the EC before implementation of such

CONFIDENTIAL

The information contained herein may not be used, disclosed, or published without the written consent of  
Biogen MA Inc.

modifications to the conduct of the study. If required by local law, such modifications must also be approved by the appropriate regulatory agency prior to implementation.

However, Biogen may, at any time, amend this protocol to eliminate an apparent immediate hazard to a subject. In this case, the appropriate regulatory authorities will be notified subsequent to the modification.

In the event of a protocol modification, the subject consent form may require similar modifications (see Section 10.2 and Section 10.3).

#### **12.4. Ethics Committee Notification of Study Completion or Termination**

Where required, the Health Authorities and ECs must be notified of completion or termination of this study, and sent a copy of the study synopsis in accordance with necessary timelines.

#### **12.5. Retention of Study Data**

The minimum retention time for study records will meet the strictest standard applicable to that site, as dictated by any institutional requirements or local laws or regulations. Prior to proceeding with destruction of records, the Investigator must notify Biogen in writing and receive written authorization from Biogen to destroy study records. In addition, the Investigator must notify Biogen of any changes in the archival arrangements including, but not limited to, archival at an off-site facility or transfer of ownership if the Investigator leaves the site.

#### **12.6. Study Report Signatory**

Biogen will designate one of the participating Study Investigators as a signatory for the study report. This determination will be made by several factors, including, but not limited to, the Investigator's experience and reputation in the studied indication, the Investigator's contribution to the study in terms of design, management, and/or subject enrollment, or by other factors determined to be relevant by Biogen.

CONFIDENTIAL

The information contained herein may not be used, disclosed, or published without the written consent of  
Biogen MA Inc.

### 13. REFERENCES

- Adams AB, Tyor WR, Holden KR. Interferon beta-1b and childhood multiple sclerosis. *Pediatr Neurol.* 1999;21(1):481-3.
- CDC. Interpretation of the hepatitis B serology panel. [CDC, 2007; Appendix A]. <http://www.cdc.gov/hepatitis/HBV/PDFs/SerologicChartv8.pdf>.
- Chitnis T, Krupp L, Yeh A, et al. Pediatric multiple sclerosis. *Neurol Clin.* 2011;29(2):481-505.
- European Commission. Ethical considerations for clinical trials on medicinal products conducted with the paediatric population. 2008. p. 34.
- Ghezzi A. Childhood-juvenile multiple sclerosis: clinical characteristics and treatment. *Expert Rev Neurother.* 2005;5(3):403-11.
- Krupp LB, Tardieu M, Amato MP, et al. International Pediatric Multiple Sclerosis Study Group criteria for pediatric multiple sclerosis and immune-mediated central nervous system demyelinating disorders: revisions to the 2007 definitions. *Mult Scler.* 2013;19(10):1261-7.
- Lublin FD, Reingold SC. Defining the clinical course of multiple sclerosis: results of an international survey. National Multiple Sclerosis Society (USA) Advisory Committee on Clinical Trials of New Agents in Multiple Sclerosis. *Neurology.* 1996;46(4):907-911.
- Mikaeloff Y, Moreau T, Debouverie M, et al. Interferon-beta treatment in patients with childhood-onset multiple sclerosis. *J Pediatr.* 2001;139(3):443-6.
- Pohl D, Rostasy K, Gärtner J, et al. Treatment of early onset multiple sclerosis with subcutaneous interferon beta-1a. *Neurology.* 2005;64(5):888-890.
- Waubant E, Chabas D. Pediatric multiple sclerosis. *Curr Treat Options Neurol.* 2009;11(3):203-10.
- Zhu HJ, Appel DI, Jiang Y, et al. Age- and sex-related expression and activity of carboxylesterase 1 and 2 in mouse and human liver. *Drug Metab Dispos.* 2009;37(9):1819-25.

CONFIDENTIAL

The information contained herein may not be used, disclosed, or published without the written consent of Biogen MA Inc.

#### **14. SIGNED AGREEMENT OF THE STUDY PROTOCOL**

I have read the foregoing protocol, “Open-Label, Randomized, Multicenter, Multiple-Dose, Active-Controlled, Parallel-Group, Efficacy and Safety Study of BG00012 in Children From 10 to Less Than 18 Years of Age With Relapsing-Remitting Multiple Sclerosis, With Optional Open-Label Extension” and agree to conduct the study according to the protocol and the applicable ICH guidelines and GCP regulations, and to inform all who assist me in the conduct of this study of their responsibilities and obligations.

---

Investigator’s Signature

Date

---

Investigator’s Name (Print)

---

Study Site (Print)

CONFIDENTIAL

The information contained herein may not be used, disclosed, or published without the written consent of Biogen MA Inc.



**109MS306**

**Biogen - BG00012 in MS**

**Statistical Analysis Plan**

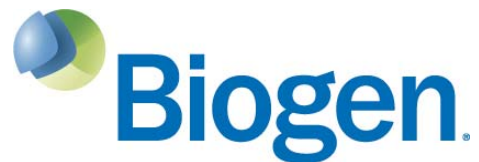

**BIOGEN**

**STATISTICAL ANALYSIS PLAN**

---

**Open-Label, Randomized, Multicenter, Multiple-Dose, Active-Controlled, Parallel-Group, Efficacy and Safety Study of BG00012 in Children From 10 to Less Than 18 Years of Age With Relapsing-Remitting Multiple Sclerosis, With Optional Open-Label Extension**

---

Statistical Analysis Plan for 109MS306 (BG00012, Avonex in pediatric population)  
V1.0 dated 06DEC2019

Protocol 109MS306: Phase 3 Study

Product Studied: BG00012

Date of Protocol: July 25, 2017 (version 5)

Date of SAP: December 6<sup>th</sup>, 2019

Written By:

PPD

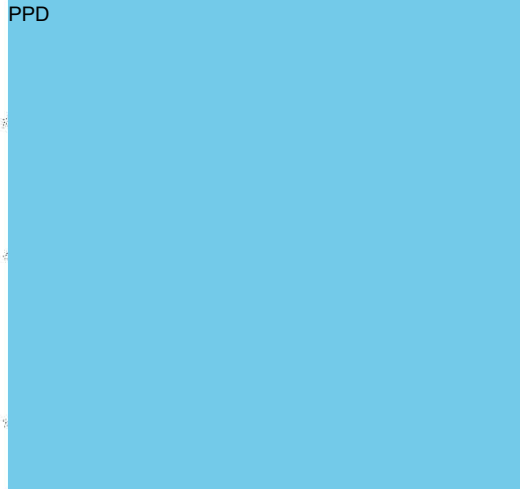

06-DEC-2019  
Date

Approved By:

16-DEC-2019  
Date

06-DEC-2019  
Date

**Confidentiality Statement**

The information in this document contains trade secrets and commercial information that are privileged or confidential and may not be disclosed unless such disclosure is required by applicable law or regulation. In any event, persons to whom the information is disclosed must be informed that the information is privileged or confidential and may not be further disclosed by them. These restrictions on disclosure will apply equally to all future information supplied to you which is indicated as privileged or confidential.

TABLE OF CONTENTS

|                |                                                       |    |
|----------------|-------------------------------------------------------|----|
| <u>1</u>       | <u>STUDY OBJECTIVES AND ENDPOINTS</u>                 | 8  |
| <u>1.1</u>     | <u>Primary Objective and Endpoint</u>                 | 8  |
| <u>1.2</u>     | <u>Secondary Objectives and Endpoints</u>             | 8  |
| <u>1.3</u>     | <u>Exploratory Endpoints</u>                          | 8  |
| <u>2</u>       | <u>STUDY DESIGN</u>                                   | 9  |
| <u>2.1</u>     | <u>Study Overview</u>                                 | 9  |
| <u>2.2</u>     | <u>Overall Study Duration and Follow-Up</u>           | 10 |
| <u>3</u>       | <u>STUDY ACTIVITIES</u>                               | 11 |
| <u>4</u>       | <u>INTERIM ANALYSIS</u>                               | 17 |
| <u>5</u>       | <u>SAMPLE SIZE JUSTIFICATION</u>                      | 17 |
| <u>6</u>       | <u>STATISTICAL ANALYSIS METHODS</u>                   | 17 |
| <u>6.1</u>     | <u>Description of Analytic Methods</u>                | 18 |
| <u>6.1.1</u>   | <u>Summary of Baseline Data</u>                       | 18 |
| <u>6.1.2</u>   | <u>Accounting of Subjects</u>                         | 18 |
| <u>6.1.3</u>   | <u>Protocol Deviations</u>                            | 18 |
| <u>6.1.4</u>   | <u>Demographic and Baseline Characteristics</u>       | 18 |
| <u>6.1.5</u>   | <u>Concomitant Medications and Non-drug Therapies</u> | 19 |
| <u>6.1.6</u>   | <u>Exposure to study drug</u>                         | 19 |
| <u>6.1.7</u>   | <u>Visit Windows</u>                                  | 19 |
| <u>6.2</u>     | <u>Efficacy Analysis</u>                              | 20 |
| <u>6.2.1</u>   | <u>Analysis Population</u>                            | 20 |
| <u>6.2.2</u>   | <u>Analysis Methods</u>                               | 20 |
|                | 20                                                    |    |
| <u>6.2.2.1</u> | <u>Primary Endpoint Analysis</u>                      | 21 |
| <u>6.2.2.2</u> | <u>Secondary Endpoint Analysis</u>                    | 22 |
| <u>6.2.2.3</u> | <u>Exploratory Endpoint Analysis</u>                  | 24 |
| <u>6.2.3</u>   | <u>Missing data</u>                                   | 25 |
| <u>6.3</u>     | <u>Safety Data</u>                                    | 25 |
| <u>6.3.1</u>   | <u>Analysis Population</u>                            | 25 |
| <u>6.3.2</u>   | <u>Analysis Methods</u>                               | 25 |
| <u>6.3.2.1</u> | <u>Definition of Baseline Value and Visit Windows</u> | 26 |
| <u>6.3.2.2</u> | <u>Clinical Adverse Events</u>                        | 26 |
| <u>6.3.2.3</u> | <u>Clinical Laboratory Data</u>                       | 27 |
| <u>6.3.2.4</u> | <u>Radiological Safety Assessments</u>                | 28 |
| <u>6.3.2.5</u> | <u>Vital Signs Data</u>                               | 29 |

|                                |                                                |    |
|--------------------------------|------------------------------------------------|----|
| <a href="#"><u>6.3.2.6</u></a> | <a href="#"><u>12-Lead ECG</u></a> .....       | 29 |
| <a href="#"><u>6.3.2.7</u></a> | <a href="#"><u>Height and Weight</u></a> ..... | 30 |

List of Abbreviations

|                 |                                            |
|-----------------|--------------------------------------------|
| AE              | adverse event                              |
| ALT             | alanine transaminase                       |
| ANCOVA          | analysis of covariance                     |
| ARR             | annualized relapse rate                    |
| AST             | aspartate transaminase                     |
| BID             | twice daily                                |
| BUN             | blood urea nitrogen                        |
| BVMT-R          | Brief Visuospatial Memory Test - Revised   |
| CI              | confidence interval                        |
| CNS             | central nervous system                     |
| CRO             | contract research organization             |
| CSR             | clinical study report                      |
| DHA             | Directions for Handling and Administration |
| DMF             | dimethyl fumarate                          |
| DSMB            | Data Safety Monitoring Board               |
| EC              | ethics committee                           |
| ECG             | electrocardiogram                          |
| eCRF            | electronic case report form                |
| EDSS            | Expanded Disability Status Scale           |
| FSH             | follicle-stimulating hormone               |
| GCP             | Good Clinical Practice                     |
| Gd              | gadolinium                                 |
| GGT             | gamma-glutamyl-transferase                 |
| GI              | gastrointestinal                           |
| HbcAb           | hepatitis B core antibody                  |
| HbsAb           | hepatitis B surface antibody               |
| HbsAg           | Hepatitis B surface antigen                |
| ICF             | informed consent form                      |
| ICH             | International Conference on Harmonisation  |
| IFN $\beta$     | interferon $\beta$                         |
| IFN $\beta$ -1a | interferon $\beta$ -1a                     |
| IM              | intramuscular                              |
| ITT             | Intent-to-Treat                            |
| IV              | intravenous                                |
| IVMP            | intravenous methylprednisolone             |
| IXRS            | Interactive Voice/Web Response System      |
| LH              | luteinizing hormone                        |
| LLN             | lower limit of normal                      |
| MMF             | monomethyl fumarate                        |
| MRI             | magnetic resonance imaging                 |
| MS              | multiple sclerosis                         |
| PedsQL          | Pediatric Quality of Life Inventory        |
| PHI             | protected health information               |

|       |                                               |
|-------|-----------------------------------------------|
| RDC   | remote data capture                           |
| RRMS  | relapsing-remitting multiple sclerosis        |
| SABR  | Safety and Benefit-Risk Management            |
| SAE   | serious adverse event                         |
| SAP   | Statistical Analysis Plan                     |
| SD    | standard deviation                            |
| SDMT  | Symbol Digit Modalities Test                  |
| SUSAR | suspected unexpected serious adverse reaction |
| TID   | 3 times daily                                 |
| ULN   | upper limit of normal                         |
| US    | United States                                 |
| WBC   | white blood cell                              |

## **1 STUDY OBJECTIVES AND ENDPOINTS**

### **1.1 Primary Objective and Endpoint**

- The primary objective of the study is to evaluate the safety, tolerability, and efficacy of BG00012 in pediatric subjects with relapsing-remitting multiple sclerosis (RRMS), as compared with a disease-modifying treatment

Primary endpoint:

- The proportion of subjects free of new or newly enlarging T2 hyperintense lesions on brain MRI scans at Week 96

### **1.2 Secondary Objectives and Endpoints**

The secondary objective of this study are as follows:

- to assess health outcomes and evolution of disability

The secondary endpoints are:

- Number of new or newly enlarging T2 hyperintense lesions on brain MRI scans at Weeks 24 and 96
- Proportion of subjects free of new or newly enlarging T2 hyperintense lesions on brain MRI scans at Weeks 24 and 48
- Proportion of subjects free of new MRI activity (i.e., free of Gd-enhancing and free of new or newly enlarging T2 MRI lesions on brain MRI scans) at Weeks 24, 48, and 96
- Time to first relapse
- Proportion of subjects free of relapse up to Week 96
- Annualized relapse rate (ARR) at Weeks 48 and 96
- Incidence of AEs and serious adverse events (SAEs), including prospective follow-up of flushing, nausea, abdominal pain, and diarrhea
- Vital signs, electrocardiograms (ECGs), and changes in clinical laboratory data, including liver function, renal function, hematologic, and coagulation parameters
- Fatigue as measured by the PedsQL Multidimensional Fatigue Scale scores
- Quality of Life as measured by the PedsQL
- Change from baseline to Week 96 in the EDSS score

### **1.3 Exploratory Endpoints**

The exploratory endpoints of Part 1 are as follows:

- Number of new or newly enlarging T2 hyperintense lesions on brain MRI scans at Weeks 48 and 72
- Proportion of subjects free of new or newly enlarging T2 hyperintense lesions on brain MRI scans at Week 72
- Proportion of subjects free of new MRI activity (i.e., free of Gd-enhancing and free of new or newly enlarging T2 MRI lesions on brain MRI scans) at Week 72
- Number of new T1 hypointense lesions on brain MRI scans at Weeks 24, 48, 72, and 96
- Number of Gd-enhancing lesions on brain MRI scans at Weeks 24, 48, 72, and 96
- Time to progression of disability at 96 weeks as measured by at least a 1.0 point increase on the EDSS from baseline EDSS  $\geq 1.0$  that is sustained for 12 weeks, or at least a 1.5 point increase on the EDSS from baseline EDSS = 0 that is sustained for 12 weeks
- BVMT-R scores (to assess learning/memory) and SDMT scores (to assess processing speed), and school progression query at Weeks 48 and 96

## 2 STUDY DESIGN

### 2.1 Study Overview

Part 1 will be an open-label, randomized, multicenter, multiple dose, active controlled, parallel group phase to evaluate the safety, tolerability, and efficacy of daily oral BG00012 administered for 96 weeks, compared with disease modifying treatment for pediatric MS, in male and female pediatric subjects with RRMS (aged from 10 to less than 18 years old at the time of informed consent or assent). Only subjects who have agreed (through parents or legal guardians, according to local regulations) with their treating physician to be involved in the study will be enrolled. Subjects will be screened over a maximum of 6 weeks prior to first dose.

Eligible subjects will be randomly assigned in a 1:1 ratio to treatment with BG00012, administered orally at a dose of 240 mg BID, or IFN  $\beta$ 1a (Avonex), administered at a dose of 30  $\mu$ g once weekly by intramuscular (IM) injection. Randomization will be stratified according to whether or not the subject received therapy with IFN  $\beta$ -1a or glatiramer acetate in the 4 weeks prior to study entry and in accordance with the following 3 age groups:

10 to <13 years: at least 10 evaluable (for primary endpoint) subjects

13 to <15 years: at least 20 evaluable (for primary endpoint) subjects

15 to <18 years: at least 60 evaluable (for primary endpoint) subjects

The goal is to obtain a total of at least 100 evaluable subjects. At least 30 evaluable subjects must be male.



## **2.2 Overall Study Duration and Follow-Up**

Part 1 will consist of Screening (up to 6 weeks), Treatment Period (96 weeks), and Safety Follow-Up for those subjects who are not continuing into Part 2. All subjects who complete the Week 96 Visit will be eligible to participate in Part 2. Part 1 will be reported separate from Part 2. A statistical analysis plan for Part 2 of this study will be produced.

### ***End of Study for Subjects***

The end of Part 1 of the study is the last subject, last visit for final collection of data at week 96 for subjects who participate in Part 2. If a subject is not participating in Part 2, the end of the study will be the Safety Follow-Up visit. This visit is up to 4 weeks after the last dose of study treatment.

### 3 STUDY ACTIVITIES

**Table 1: Study Activities - Part 1**

| Tests and Assessments <sup>1</sup>      | Screening Visit              |                        |                                         |          |           |           |            |            |            |            |            |            |
|-----------------------------------------|------------------------------|------------------------|-----------------------------------------|----------|-----------|-----------|------------|------------|------------|------------|------------|------------|
|                                         | (Within 6 Weeks of Baseline) | Baseline Visit (Day 1) | Wk 2 ±5D Safety Phone Call <sup>2</sup> | Wk4 ± 5D | Wk 8 ± 5D | Wk 12 ±5D | Wk 24 ± 5D | Wk 36 ± 5D | Wk 48 ± 5D | Wk 60 ± 5D | Wk 72 ± 5D | Wk 84 ± 5D |
| Informed Consent or Assent <sup>3</sup> | X                            |                        |                                         |          |           |           |            |            |            |            |            |            |
| Eligibility Criteria                    | X                            | X                      |                                         |          |           |           |            |            |            |            |            |            |
| Medical History <sup>4</sup>            | X                            |                        |                                         |          |           |           |            |            |            |            |            |            |
| Hepatitis C Antibody and HBsAg Screen   | X                            |                        |                                         |          |           |           |            |            |            |            |            |            |
| Randomization                           |                              | X                      |                                         |          |           |           |            |            |            |            |            |            |
| Physical Examination                    | X                            | X                      |                                         |          |           |           | X          |            | X          |            | X          |            |
| Body Weight                             | X                            | X                      |                                         | X        | X         | X         | X          | X          | X          | X          | X          | X          |
| Height                                  | X                            |                        |                                         |          |           |           | X          |            | X          |            |            |            |
| Tanner Score <sup>5</sup>               | X                            |                        |                                         |          |           |           |            |            | X          |            |            |            |
| Vital Signs <sup>6</sup>                | X                            | X                      |                                         | X        | X         | X         | X          | X          | X          | X          | X          | X          |
| 12-Lead ECG                             | X                            | X <sup>7</sup>         |                                         | X        |           |           |            |            | X          |            |            |            |
| Hematology <sup>8</sup>                 | X                            | X                      |                                         | X        | X         | X         | X          | X          | X          | X          | X          | X          |
| Blood Chemistry                         | X                            | X                      |                                         | X        | X         | X         | X          | X          | X          | X          | X          | X          |
| PTT, PT, INR                            |                              | X                      |                                         |          |           |           | X          |            | X          |            |            |            |
| Urine Pregnancy Test <sup>9, 10</sup>   | X                            | X                      |                                         | X        | X         | X         | X          | X          | X          | X          | X          | X          |
| Urinalysis <sup>11</sup>                | X                            | X                      |                                         | X        | X         | X         | X          | X          | X          | X          | X          | X          |
| Endocrine Tests <sup>12</sup>           |                              | X                      |                                         |          |           |           |            |            | X          |            |            |            |

CONFIDENTIAL

The information contained herein may not be used, disclosed, or published without the written consent of Biogen MA Inc.

Statistical Analysis Plan for 109MS306 (BG00012, Avonex in pediatric population)  
V1.0 dated 6DEC2019

| Tests and Assessments <sup>1</sup>                            | Screening Visit              |                                                                                     |                                         |          |           |           |            |            |            |            |            |            |
|---------------------------------------------------------------|------------------------------|-------------------------------------------------------------------------------------|-----------------------------------------|----------|-----------|-----------|------------|------------|------------|------------|------------|------------|
|                                                               | (Within 6 Weeks of Baseline) | Baseline Visit (Day 1)                                                              | Wk 2 ±5D Safety Phone Call <sup>2</sup> | Wk4 ± 5D | Wk 8 ± 5D | Wk 12 ±5D | Wk 24 ± 5D | Wk 36 ± 5D | Wk 48 ± 5D | Wk 60 ± 5D | Wk 72 ± 5D | Wk 84 ± 5D |
| EDSS                                                          | X                            | X                                                                                   |                                         |          |           | X         | X          | X          | X          | X          | X          | X          |
| Brain MRI Scan ± Gd <sup>13, 14</sup>                         |                              | X                                                                                   |                                         |          |           |           | X          |            | X          |            | X          |            |
| Hand and Wrist X-ray <sup>15</sup>                            |                              | X                                                                                   |                                         |          |           |           |            |            | X          |            |            |            |
| PedsQL, PedsQL Multidimensional Fatigue Scale                 |                              | X                                                                                   |                                         |          |           |           | X          |            | X          |            | X          |            |
| BVMT-R                                                        |                              | X                                                                                   |                                         |          |           |           |            |            | X          |            |            |            |
| SDMT                                                          |                              | X                                                                                   |                                         |          |           |           |            |            | X          |            |            |            |
| Query Regarding Annual School/Grade Progression <sup>16</sup> |                              | X                                                                                   |                                         |          |           |           |            |            | X          |            |            |            |
| Dispense Treatment                                            |                              | X <sup>1</sup>                                                                      |                                         | X        | X         | X         | X          | X          | X          | X          | X          | X          |
| Concomitant Therapy and Procedures                            |                              |                                                                                     | X                                       |          |           |           |            |            |            |            |            |            |
| SAEs Recording                                                |                              | Monitor and record throughout the study as described in Section 8.2 of the protocol |                                         |          |           |           |            |            |            |            |            |            |
| AEs Recording                                                 |                              | Monitor and record throughout the study as described in Section 8.2 of the protocol |                                         |          |           |           |            |            |            |            |            |            |

AE = adverse event; BVMT-R = Brief Visuospatial Memory Test - Revised; D = days; ECG = electrocardiogram; EDSS = Expanded Disability Status Scale; FSH = follicle-stimulating hormone; Gd = gadolinium; HBsAg = hepatitis B surface antigen; INR = international normalized ratio; LH = luteinizing hormone; LLN = lower limit of normal; MRI = magnetic resonance imaging; MS = multiple sclerosis; PedsQL = Pediatric Quality of Life Inventory; PT = prothrombin time; PTT = partial thromboplastin time; SAE = serious adverse event; SDMT = Symbol Digit Modalities Test; Wk = week.

Note: Study visits (weeks) are calculated relative to Baseline (Day 1).

<sup>1</sup> All tests and evaluations are to be performed before dispensing initial study treatment.

<sup>2</sup> At Week 2 ± 5D, subjects will receive a safety telephone call from the study site staff.

<sup>3</sup> Written informed consent from the subject's parents or legal guardians and assent from the subject, if appropriate, must be obtained prior to performing any study-related procedures.

<sup>4</sup> Medical history will include complete MS history of disease (including pubertal status at the onset of disease), MS diagnostic criteria, MS signs and symptoms, and MS treatment history.

CONFIDENTIAL

The information contained herein may not be used, disclosed, or published without the written consent of Biogen MA Inc.

Statistical Analysis Plan for 109MS306 (BG00012, Avonex in pediatric population)  
V1.0 dated 6DEC2019

- <sup>5</sup> Assessment of Tanner stages should be performed by a medical doctor experienced with this assessment. Information regarding Tanner staging will be collected at baseline for all male subjects and for female subjects who are premenarche and will be stopped once the subject's bone age reaches  $\geq 16$  years or once the subject is postmenarche.
- <sup>6</sup> Subjects will have their body temperature, heart rate, respiratory rate, and diastolic and systolic blood pressure measured. Subjects must remain in the same body position for 5 minutes prior to having heart rate and blood pressure taken.
- <sup>7</sup> Performed before dosing at this visit.
- <sup>8</sup> Lymphocyte counts must be tested every 4 weeks in subjects with lymphocyte count  $< LLN$ . See Lymphocyte Follow-Up Visit in Table 2 in the protocol.
- <sup>9</sup> For females of childbearing potential. Results must be known prior to dispensing study treatment.
- <sup>10</sup> All urine pregnancy testing will be performed at the study site.
- <sup>11</sup> Urine cytology must be performed if microscopic hematuria of unknown etiology is observed under either of the following conditions: a) hematuria is present on 2 consecutive tests, or b) hematuria is observed at the End of Study/Early Withdrawal/Safety Follow-Up Visit. If urine cytology is positive, the subject must permanently discontinue study treatment (see Table 8 in the protocol).
- <sup>12</sup> Endocrine parameters to be tested will include insulin-like growth factor 1, insulin-like growth factor binding protein, FSH, LH, and estradiol (E-2) for females and testosterone, FSH, and LH for males. All endocrine tests will be collected at baseline for all male subjects and for female subjects who are premenarche and will stop being collected once the subject's bone age reaches  $\geq 16$  years or once the subject is postmenarche.
- <sup>13</sup> MRI must not be performed within 30 days of receiving a course of steroids, with the exception of MRIs obtained for the purpose of relapse assessment.
- <sup>14</sup> MRI must be performed and reviewed within 14 days prior to or on Day 1 (Baseline Visit), and at Weeks  $24 \pm 14$  days,  $48 \pm 14$  days, and  $72 \pm 14$  days.
- <sup>15</sup> An x-ray of the left hand and wrist to determine bone age will be performed at baseline for all male subjects and for female subjects who are premenarche, if permitted by the local regulatory authority. Assessment of this x-ray for determination of bone age should be performed by a radiologist experienced with this assessment. For subsequent visits, once the bone age is determined to be  $\geq 16$  years of age or once the subject is postmenarche, no further bone x-rays are required.
- <sup>16</sup> If permitted by the local regulatory authority, subjects or caregivers will be posed the following question: "During the past year, did [you/the subject] progress from one [class/grade-level] to the next in school?"

CONFIDENTIAL

The information contained herein may not be used, disclosed, or published without the written consent of Biogen MA Inc.

Statistical Analysis Plan for 109MS306 (BG00012, Avonex in pediatric population)  
 V1.0 dated 6DEC2019

**Table 2: Study Activities (Unscheduled and Post-Treatment Visits) - Part 1**

| Tests and Assessments <sup>1</sup>               | End of Part 1/<br>Baseline Part 2 Visit | Early Withdrawal Visit | Safety Follow-Up Visit <sup>2</sup> | Lymphocyte<br>Follow-Up Visit <sup>3</sup> | Unscheduled Relapse<br>Assessment Visit <sup>4</sup> |
|--------------------------------------------------|-----------------------------------------|------------------------|-------------------------------------|--------------------------------------------|------------------------------------------------------|
| Week                                             | Wk 96 ± 5D                              |                        | No Later Than Wk 100<br>± 5D        |                                            |                                                      |
| Informed Consent or Assent                       | X <sup>5</sup>                          |                        |                                     |                                            |                                                      |
| Physical Examination                             | X                                       | X                      | X                                   | X                                          | X                                                    |
| Body Weight                                      | X                                       | X                      | X                                   |                                            | X                                                    |
| Height                                           | X                                       | X                      | X                                   |                                            |                                                      |
| Tanner Score <sup>6</sup>                        | X                                       | X                      |                                     |                                            |                                                      |
| Vital Signs <sup>7</sup>                         | X                                       | X                      | X                                   | X                                          | X                                                    |
| 12-Lead ECG                                      | X                                       | X                      | X                                   |                                            |                                                      |
| Hematology <sup>8</sup>                          | X                                       | X                      | X                                   | X                                          | X                                                    |
| Blood Chemistry                                  | X                                       | X                      | X                                   |                                            | X                                                    |
| PTT, PT, INR                                     | X                                       | X                      |                                     |                                            |                                                      |
| Urine Pregnancy Test <sup>9, 10</sup>            | X                                       | X                      | X                                   |                                            | X                                                    |
| Urinalysis <sup>11</sup>                         | X                                       | X                      | X                                   |                                            | X                                                    |
| Endocrine Tests <sup>12</sup>                    | X                                       | X                      |                                     |                                            |                                                      |
| EDSS                                             | X                                       | X                      |                                     |                                            | X                                                    |
| Brain MRI Scan ± Gd <sup>13</sup>                | X                                       | X                      |                                     |                                            | X                                                    |
| Hand and Wrist X-ray <sup>14</sup>               | X                                       | X                      |                                     |                                            |                                                      |
| PedsQL, PedsQL Multidimensional<br>Fatigue Scale | X                                       | X                      |                                     |                                            | X                                                    |
| BVMT-R                                           | X                                       | X                      |                                     |                                            |                                                      |
| SDMT                                             | X                                       | X                      |                                     |                                            |                                                      |

CONFIDENTIAL

The information contained herein may not be used, disclosed, or published without the written consent of Biogen MA Inc.

Statistical Analysis Plan for 109MS306 (BG00012, Avonex in pediatric population)  
V1.0 dated 6DEC2019

| Tests and Assessments <sup>1</sup>                               | End of Part 1/<br>Baseline Part 2 Visit                                             | Early Withdrawal Visit | Safety Follow-Up Visit <sup>2</sup> | Lymphocyte<br>Follow-Up Visit <sup>3</sup> | Unscheduled Relapse<br>Assessment Visit <sup>4</sup> |
|------------------------------------------------------------------|-------------------------------------------------------------------------------------|------------------------|-------------------------------------|--------------------------------------------|------------------------------------------------------|
| Week                                                             | Wk 96 ± 5D                                                                          |                        | No Later Than Wk 100<br>± 5D        |                                            |                                                      |
| Dispense Treatment                                               | X                                                                                   |                        |                                     |                                            |                                                      |
| Relapse Assessment                                               |                                                                                     |                        |                                     |                                            | X                                                    |
| Query Regarding Annual<br>School/Grade Progression <sup>15</sup> | X                                                                                   |                        |                                     |                                            |                                                      |
| Concomitant Therapy and Procedures                               |                                                                                     | X                      |                                     | X                                          | X                                                    |
| SAEs Recording                                                   | Monitor and record throughout the study as described in Section 8.2 of the protocol |                        |                                     | X                                          | X                                                    |
| AEs Recording                                                    | Monitor and record throughout the study as described in Section 8.2 of the protocol |                        |                                     | X                                          | X                                                    |

AE = adverse event; BVM-T-R = Brief Visuospatial Memory Test - Revised; D = days; ECG = electrocardiogram; EDSS = Expanded Disability Status Scale; FSH = follicle-stimulating hormone; Gd = gadolinium; HBsAg = hepatitis B surface antigen; INR = international normalized ratio; LH = luteinizing hormone; LLN = lower limit of normal; MRI = magnetic resonance imaging; MS = multiple sclerosis; PedsQL = Pediatric Quality of Life Inventory; PT = prothrombin time; PTT = partial thromboplastin time; SAE = serious adverse event; SDMT = Symbol Digit Modalities Test; Wk = week.

Note: Study visits (weeks) are calculated relative to Baseline (Day 1).

<sup>1</sup> All tests and evaluations are to be performed before dispensing initial study treatment.

<sup>2</sup> The Safety Follow-Up Visit will be conducted for subjects who will not continue in the Part 2 and for those who withdraw prematurely.

<sup>3</sup> Subjects treated with BG00012 who complete, temporarily withhold, or permanently discontinue study treatment for any reason and have a lymphocyte count <LLN will be followed every 4 weeks for 24 weeks, then every 12 weeks (**or sooner, if clinically indicated or at the Investigator's discretion**) until the lymphocyte count is ≥LLN, for at least 48 weeks following BG00012 treatment discontinuation, or until initiation of another MS disease modifying therapy, whichever occurs first. Any subject treated with BG00012 in Part 1 with a lymphocyte count <LLN being followed at the Part 1 Week 96 Visit (including subjects who completed, are temporarily withholding, or permanently discontinued BG00012 treatment) will continue follow-up within Part 2 of the study.

<sup>4</sup> Unscheduled Relapse Assessment Visit (assessment by the *treating* neurologist) to be carried out as soon as possible and within 72 hours of suspected relapse. See Section 6.3.3 and Section 6.9.2 in the protocol for further details.

<sup>5</sup> Written informed consent from the subject's parents or legal guardians and assent from the subject, if appropriate, must be obtained prior to performing any study-related procedures for Part 2.

<sup>6</sup> Assessment of Tanner stages should be performed by a medical doctor experienced with this assessment. Information regarding Tanner staging will be collected at baseline for all male subjects and for female subjects who are premenarche and will be stopped once the subject's bone age reaches ≥16 years or once the subject is postmenarche.

<sup>7</sup> Subjects will have their body temperature, heart rate, respiratory rate, and diastolic and systolic blood pressure measured. Subjects must remain in the same body position for 5 minutes prior to having heart rate and blood pressure taken.

<sup>8</sup> Lymphocyte counts must be tested every 4 weeks in subjects with lymphocyte count <LLN. See Lymphocyte Follow-Up Visit.

<sup>9</sup> For females of childbearing potential. Results must be known prior to dispensing study treatment.

<sup>10</sup> All urine pregnancy testing will be performed at the study site.

CONFIDENTIAL

The information contained herein may not be used, disclosed, or published without the written consent of Biogen MA Inc.

Statistical Analysis Plan for 109MS306 (BG00012, Avonex in pediatric population)  
V1.0 dated 6DEC2019

- <sup>11</sup> Urine cytology must be performed if microscopic hematuria of unknown etiology is observed under either of the following conditions: a) hematuria is present on 2 consecutive tests, or b) hematuria is observed at the End of Study/Early Withdrawal/Safety Follow-Up Visit. If urine cytology is positive, the subject must permanently discontinue study treatment (see Table 8 in the protocol).
- <sup>12</sup> Endocrine parameters to be tested will include insulin-like growth factor 1, insulin-like growth factor binding protein, FSH, LH, and estradiol (E-2) for females and testosterone, FSH, and LH for males. All endocrine tests will be collected at baseline for all male subjects and for female subjects who are premenarche and will stop being collected once the subject's bone age reaches  $\geq 16$  years or once the subject is postmenarche.
- <sup>13</sup> MRI must not be performed within 30 days of receiving a course of steroids, with the exception of MRIs obtained for the purpose of relapse assessment.
- <sup>14</sup> An x-ray of the left hand and wrist to determine bone age will be performed at baseline for all male subjects and for female subjects who are premenarche, if permitted by the local regulatory authority. Assessment of this x-ray for determination of bone age should be performed by a radiologist experienced with this assessment. For subsequent visits, once the bone age is determined to be  $\geq 16$  years of age or once the subject is postmenarche, no further bone x-rays are required.
- <sup>15</sup> If permitted by the local regulatory authority, subjects or caregivers will be posed the following question: "During the past year, did [you/the subject] progress from one [class/grade-level] to the next in school?"

CONFIDENTIAL

The information contained herein may not be used, disclosed, or published without the written consent of Biogen MA Inc.

#### **4 INTERIM ANALYSIS**

Only the data from Part 2 of this study will be summarized periodically to support regulatory submissions or when further information on the long-term safety and efficacy of BG00012 in the pediatric population is required.

#### **5 SAMPLE SIZE JUSTIFICATION**

The study is not powered for the primary endpoint of Part 1. The sample size is primarily based on feasibility, with the goal of having 50 evaluable subjects at the 96 week timepoint of Part 1 for each treatment group.

Based on an estimated dropout rate of approximately 30% over 2 years, a total of 142 subjects will need to be enrolled to have at least 100 evaluable subjects (50 subjects/treatment group) after 2 years of treatment.

With respect to the primary endpoint of Part 1, if the proportion of subjects free of new or newly enlarging T2 hyperintense lesions is approximately 25%, the width of the 95% CI for the proportion will be approximately 0.24. If the proportion is around 40%, the width of the 95% CI will be approximately 0.28.

This sample size will provide approximately 82% power for the key secondary endpoint of Part 1 of number of new or newly enlarging T2 hyperintense lesions at Week 24. The assumptions were based on historical data on treatment effect for IFN  $\beta$  1a (Avonex) and BG00012 on the number of T2 hyperintense lesions compared with placebo.

It is assumed that the mean (SD) will be 3.5 (6.3) and 1.22 (2.92) for the number of new or newly enlarging T2 hyperintense lesions at Week 24 for the IFN  $\beta$  1a (Avonex) group and the BG00012 group, respectively (a 65% reduction over the IFN  $\beta$  1a group). At Week 24, a 10% dropout rate is expected, resulting in about 63 evaluable subjects per group. Based on these assumptions, the study will have approximately 82% power to detect the difference between BG00012 and IFN  $\beta$  1a. This power calculation is based on a negative binomial simulation.

#### **6 STATISTICAL ANALYSIS METHODS**

The statistical software, SAS<sup>®</sup>, will be used for all summaries and statistical analyses.

Statistical analyses will be descriptive in nature with appropriate measures of variation provided where applicable. For continuous endpoints, summary statistics will generally include the following: number of subjects with data, mean, standard deviation, median, and range. For categorical endpoints, summary statistics will generally include the frequency distribution of the analysis population.

CONFIDENTIAL

The information contained herein may not be used, disclosed, or published without the written consent of  
Biogen MA Inc.



## **6.1 Description of Analytic Methods**

Summary statistics along with 95% confidence intervals (CIs) will be presented for both discrete and continuous efficacy outcomes. P-values may be supplied to describe significance. Safety data (laboratory assessments, vital signs, adverse events) will be summarized by treatment received. Efficacy data will be summarized as randomized.

### **6.1.1 Summary of Baseline Data**

Baseline data are defined as data collected prior to the administration of BG00012 or Interferon  $\beta$ -1a on Day 1 of study 109MS306. If data on Day 1 is not available, screening assessments may be used provided they are within 6 weeks of the baseline visit. Demographics and baseline characteristics will be summarized using descriptive statistics for each treatment group and overall.

If there are clinically relevant imbalances in important baseline characteristics, appropriate statistical methods will be used to analyze the endpoint (e.g., logistic regression) to adjust for the baseline covariates. Summary statistics and 95% CIs will be presented from the model.

### **6.1.2 Accounting of Subjects**

Number of subjects who enrolled into the 109MS306 study, number randomized, number who received at least one dose of BG00012 or Interferon  $\beta$ -1a, number completing treatment, number completing the study, number entering the long term extension (Part 2), number discontinuing prior to Week 96 and reason for early withdrawal, will be summarized by treatment and overall.

### **6.1.3 Protocol Deviations**

Major and minor protocol deviations identified in the study will be listed.

### **6.1.4 Demographic and Baseline Characteristics**

Demographic data, including age (in years, at the time of consent to study 109MS306), age group (10 - <13, 13 - <15, 15 - <18) will be summarized for each treatment and overall. In addition, baseline height (cm) and weight (kg) and Tanner Score (if applicable) will also be summarized.

Medical history will be summarized by treatment and overall for subjects randomized in 109MS306 that had experienced certain maladies prior to entering the study. The number and percentage of subjects within each category will be summarized.

MS Pediatric Diagnostic Criteria (Krupp) will be summarized by treatment and overall for the subjects who are randomized in to the study.

CONFIDENTIAL

The information contained herein may not be used, disclosed, or published without the written consent of  
Biogen MA Inc.

MS signs considered typical MS signs and symptoms will be summarized for each area: vision, cognition, coordination/balance, bladder control, bowel, sexual function, and general. In addition, MS signs related to sensory disturbances, motor disturbances, and other will be presented for the population and summarized by treatment and overall.

History of MS for the subjects randomized in 109MS306 will be summarized. This includes time since first MS symptoms and diagnosis, dominant hand, time since most recent relapse, and number of relapses prior to screening in study 109MS306 (prior 12 months, 2 years, and 3 years). In addition, the MS treatment history, including IFN  $\beta$ -1a or glatiramer acetate treatment use in the 4 weeks prior to study entry, will be summarized categorically for each therapy code by treatment and overall using counts and percents.

### **6.1.5 Concomitant Medications and Non-drug Therapies**

Concomitant medication is defined as prescribed or over-the-counter medications used during the study (on or after Day 1 of 109MS306). The World Health Organization (WHO) Drug Dictionary will be used for coding concomitant medications. The Medical Dictionary for Regulatory Activities (MedDRA, version 19.1) will be used for coding concomitant non-drug therapies.

The number and percentage of subjects taking concomitant medication and receiving non-drug treatments will be summarized by treatment and overall.

As the study progresses, a listing of all medications will be periodically reviewed by clinical personnel so as to properly classify concomitant medications as allowed or prohibited.

### **6.1.6 Exposure to study drug**

Number of days exposed to study treatment (BG00012 or Interferon  $\beta$ -1a) during study 109MS306, total amount of study treatment received and overall compliance will be summarized. Compliance for each subject is defined as the total amount of study drug received divided by the number of days on treatment.

### **6.1.7 Visit Windows**

For summary purposes, visit windows are defined for each scheduled visit. If the visit falls between the midpoint of 2 scheduled visits, the assigned visit will be the closest scheduled visit to the assessment. If at least 2 visits fall within this interval, the value closes to the scheduled visit will be used in summaries. If more than one observation falls in the same distance from the target regular scheduled visit day, the later observation will be used in the summary statistics. If a subject withdraws after receiving at least one dose of study drug, but prior to the Week 96 scheduled visit, data from the early withdrawal visit will be assigned as the next scheduled visit if it has occurred within a visit window.

CONFIDENTIAL

The information contained herein may not be used, disclosed, or published without the written consent of  
Biogen MA Inc.

## **6.2 Efficacy Analysis**

### **6.2.1 Analysis Population**

Intent-to-Treat (ITT) Population: subjects who were randomized and received at least 1 dose of study treatment.

Completers Population: subjects from the ITT Population who completed Week 96 of the study and who have MRI data for Week 96.

### **6.2.2 Analysis Methods**

In general, continuous variables will be summarized using summary statistics (mean, standard deviation [SD], median, minimum, and maximum) by treatment group, and categorical variables will be presented using frequency distributions by treatment group. Where appropriate, 95% CIs for mean, median, or proportions may also be presented. In addition, statistical modeling may be used to analyze the data. Binary outcomes may be analyzed by the logistic regression model. In general, the number of new or newly enlarging T2 lesions and new T1 hypointense lesions (i.e., new nonenhancing T1 hypointense lesions) or number of relapses will be analyzed by the negative binomial regression model. The number of Gd-enhancing lesions will be analyzed using the ordinal logistic regression model or Wilcoxon rank-sum test. Continuous responses (such as Quality of Life measures) will be analyzed by analysis of variance or analysis of covariance (ANCOVA). Time to first relapse or time to 12-week confirmed EDSS progression will be presented based on the Kaplan-Meier method and analyzed using the Cox proportional hazards model.

Twelve week confirmed EDSS progression is defined as at least a 1.0 point increase in the EDSS from baseline EDSS  $\geq 1.0$  that is sustained for 12 weeks, or at least a 1.5 point increase on the EDSS from baseline EDSS = 0 that is sustained for 12 weeks. A tentative EDSS progression is confirmed when this minimum EDSS change is present on the next study visit occurring after 74 days or longer from the initial observation. The 74 day interval is based on the visit windows allowed in the protocol around the target visit day.

The date of the initial visit at which the minimum increase in the EDSS is met will be the date of onset of the progression (tentative progression).

Progression will not be confirmed at a visit where a relapse is also occurring. A subject is considered to be having a relapse for at least 29 days after the start date of onset of a protocol-defined relapse. If a subject meets the defined criteria of sustained progression and is also having a relapse, the subject will be required to meet the defined minimum criteria at the subsequent visit.

Relapses are defined as new or recurrent neurologic symptoms not associated with fever or infection, lasting at least 24 hours, and accompanied by new objective neurological findings upon examination by the examining neurologist. The subject must have objective signs on the

CONFIDENTIAL

The information contained herein may not be used, disclosed, or published without the written consent of  
Biogen MA Inc.

examining neurologist's examination confirming the event. Suspected relapse information is recorded in the data base.

If a subject had a tentative progression prior to the start of alternative MS medication, the appropriate EDSS evaluation performed while taking alternative MS medication will be used to assess confirmation of the progression (if available). Otherwise, time to EDSS progression will be censored at the date of starting alternative MS medication. Progression must start prior to or at the End of Treatment Period Visit. If a subject had a tentative progression at the End of Treatment Period Visit in Part 1 of 109MS306, then their time to EDSS progression will be censored at that time.

Death due to MS will be counted as progression. If the subject was in the midst of a tentative progression at the time of death (e.g. the EDSS evaluation prior to death is a tentative progression), the progression date will be the tentative progression start date. Otherwise, the progression date will be the date of death.

Subjects who do not progress prior to completing Week 96 or withdraw prior to Week 96 will have their time to progression date censored at their last visit date during Part 1.

In general, the stratification factor (i.e., IFN  $\beta$ -1a or glatiramer acetate treatment in 4 weeks prior to study entry, age group) will be included in statistical models. Other baseline covariates, such as MS Pediatric Diagnostic Criteria (Krupp), gender, baseline disease status (e.g. number of relapses in 1, 2, or 3 years prior to the study), baseline EDSS, previous IFN use, may be included in the model. An additional, separate efficacy analysis will be carried out based on pubertal status at disease initiation, obtained from the Tanner Staging at screening.

### **6.2.2.1 Primary Endpoint Analysis**

The analysis of the primary endpoint, proportion of subjects free of new or newly enlarging T2 hyperintense lesions at Week 96 will include descriptive statistics (e.g., mean, SD, median) and CIs. The CIs for the proportion of subjects free of new or newly enlarging T2 hyperintense lesions at Week 96 for each treatment group will be presented. Data will be summarized using observed values. No data imputation will be used for missing observations. The primary analysis will be performed on the Completers Population.

A sensitivity analysis of the primary endpoint will be performed on the ITT Population. A logistic regression model may be used to analyze the proportion of subjects free of new or newly enlarging T2 lesions, adjusted for stratification randomization, (age group and IFN  $\beta$ -1a or glatiramer acetate use in the 4 weeks prior to study entry) and other baseline covariates, such as

CONFIDENTIAL

The information contained herein may not be used, disclosed, or published without the written consent of  
Biogen MA Inc.

baseline T2 volume, MS Pediatric Diagnostic Criteria (Krupp), gender, baseline disease status (e.g. number of relapses in 1, 2, or 3 years prior to the study), baseline EDSS, previous IFN use.

### **6.2.2.2 Secondary Endpoint Analysis**

#### **6.2.2.2.1 Number of New or Newly Enlarging T2 Hyperintense Lesions at Weeks 24 and 96**

Summary statistics for the number of new or newly enlarging T2 hyperintense lesions at both Weeks 24 and 96 will be presented by treatment group. A negative binomial regression model will be used to analyze the number of new or newly enlarging T2 hyperintense lesions at both Week 24 and at Week 96, with treatment group in the model and adjusted for randomization stratification (age group and IFN  $\beta$ -1a or glatiramer acetate use in the 4 weeks prior to study entry), and baseline number of T2 lesions. Formal statistical testing will be performed to compare the mean between the 2 treatment groups. For Week 24, the analysis will be based on subjects from the ITT Population who have observed data at Week 24. Similarly for Week 96. Missing value imputation may be performed for this analysis.

As a sensitivity analysis, the number of new or newly-enlarging T2 hyperintense lesions over 96 weeks relative to baseline will be compared between the BG00012 and Interferon  $\beta$ -1a treatment groups using a negative binomial regression model on the observed number of new or newly enlarging T2 lesions at the subject's last visit prior to the earlier of Week 96 or the start of alternative MS therapy. The logarithmic transformation of the number of scans will be included in the model as the "offset" parameter. The model will be adjusted for the baseline volume of T2 hyperintense lesions, IFN  $\beta$ -1a or glatiramer acetate treatment in 4 weeks prior and baseline age group. Results of these models will be exponentiated to transform back to lesion counts.

#### **6.2.2.2.2 Proportion of Subjects Free of New or Newly Enlarging T2 Hyperintense Lesions on Brain MRI Scans at Weeks 24 and 48**

Summary statistics will be presented for each treatment group. Additionally, this endpoint may be analyzed using logistic regression, adjusted for baseline number and volume of T2 lesions and other stratification factors (e.g., age group, IFN  $\beta$ -1a or glatiramer acetate treatment use in the 4 weeks prior to study entry).

#### **6.2.2.2.3 Proportion of Subjects Free of New MRI Activity (i.e., Free of Gd-enhancing and Free of New or Newly Enlarging T2 MRI Lesions on Brain MRI Scans) at Weeks 24, 48, and 96**

Summary statistics will be presented for each treatment group. Additionally, this endpoint may be analyzed using logistic regression, adjusted for baseline number of Gd-enhancing lesions, and/or T2 lesions and other stratification factors (e.g. age group).

CONFIDENTIAL

The information contained herein may not be used, disclosed, or published without the written consent of Biogen MA Inc.

#### **6.2.2.2.4 Time to First Relapse**

Time to first relapse and estimated proportion of subjects relapsed will be presented based on the Kaplan-Meier method. If a subject does not experience a relapse during Part 1 of the study, they will be censored at their last visit in Part 1. Time to first relapse may also be analyzed using the Cox proportional hazards model, adjusted for baseline relapse rate, baseline EDSS score, and other stratification factors (e.g. age group).

#### **6.2.2.2.5 Proportion of Subjects Free of Relapse up to Week 96**

The proportion of subjects relapse-free up to Week 96 will be summarized. In addition, for the ITT Population, the estimated proportion of subjects who are relapse-free up to Week 96 will be calculated based on the Kaplan-Meier method.

#### **6.2.2.2.6 Annualized Relapse Rate at Weeks 48 and 96**

ARR will be analyzed based on negative binomial regression, adjusted for baseline relapse rate, baseline EDSS score and stratification factors (IFN  $\beta$ -1a or glatiramer acetate treatment in 4 weeks prior to study entry, age group).

#### **6.2.2.2.7 Fatigue as Measured by the PedsQL Multidimensional Fatigue Scale Scores and Quality of Life as Measured by the PedsQL**

PedsQL Multidimensional Fatigue Scale is measured both by the subject's self-assessment and that of the parent. The fatigue scale contains 18 questions in 3 fatigue dimensions: General, Sleep/Rest and Cognitive. Scoring for each question is based on a 5-point Likert scale from 0 (Never) to 4 (Almost always). Each individual score is then reversed (subtracted from 4) and linearly transformed as follows:

$$0=100, 1=75, 2=50, 3=25, 4=0$$

For each dimension, total score will be the (sum of all the items)/(number of items answered). If more than 3 answers are missing within a dimension, the total score is not computed for that dimension and considered missing. A higher total score indicates lower problems.

PedsQL Quality of Life (QoL) is measured both by the subject's self-assessment and that of the parent. The QoL scale contains 23 questions in 4 dimensions: Physical, Emotional, Social and School. Scoring for each question is based on a 5-point Likert scale from 0 (Never) to 4 (Almost always). Each individual score is then reversed (subtracted from 4) and linearly transformed as follows:

$$0=100, 1=75, 2=50, 3=25, 4=0$$

CONFIDENTIAL

The information contained herein may not be used, disclosed, or published without the written consent of  
Biogen MA Inc.



For each dimension, total score will be the (sum of all the items)/(number of items answered). If more than half of the answers are missing within a dimension, the total score is not computed and considered missing. A higher total score indicates better quality of life.

At each scheduled visit, summary statistics will be presented for each dimension for both scales, by treatment group. Additionally, these endpoints will be analyzed using an ANCOVA, adjusted for baseline score, and stratification factors (IFN  $\beta$ -1a or glatiramer acetate treatment in 4 weeks prior to study entry, age group). Results for each scale will be presented for the self-assessment and the parent assessment.

#### **6.2.2.2.8 Change From Baseline to Week 96 in the EDSS Score**

Summary statistics of change from baseline to Week 96 in EDSS score will be presented for each treatment group. Individual EDSS Functional Scale Scores and Ambulatory Scores, along with EDSS Scores will be listed for each subject.

#### **6.2.2.3 Exploratory Endpoint Analysis**

##### **6.2.2.3.1 The analyses of the following Exploratory Endpoints will be similar to the analyses described in Section 6.2.2.2:**

- Number of new or newly enlarging T2 hyperintense lesions on brain MRI scans at Weeks 48 and 72
- Proportion of subjects free of new or newly enlarging T2 hyperintense lesions on brain MRI scans at Week 72
- Proportion of subjects free of new MRI activity (i.e., free of Gd-enhancing and free of new or newly enlarging T2 MRI lesions on brain MRI scans) at Week 72
- Number of new T1 hypointense lesions on brain MRI scans at Weeks 24, 48, 72, and 96
- Number of Gd-enhancing lesions on brain MRI scans at Weeks 24, 48, 72, and 96

##### **6.2.2.3.2 Time to progression of disability**

Time to progression of disability at 96 weeks and estimated proportion of subjects progressed at week 96 will be presented based on the Kaplan-Meier method and analyzed using Cox regression. If a subject does not experience a disability progression during Part 1 of the study, they will be censored at their last visit in Part 1.

CONFIDENTIAL

The information contained herein may not be used, disclosed, or published without the written consent of Biogen MA Inc.

### **6.2.2.3.3 BVMT-R scores, SDMT scores and school progression**

- BVMT-R scores, indicating the number correct, will be summarized for each trial (Trials 1, 2, and 3) at weeks 48 and 96 for each treatment using descriptive statistics. Change from baseline will also be summarized for this score.
- SDMT scores will be summarized at weeks 48 and 96 for each treatment using descriptive statistics. Change from baseline will also be summarized for this score.
- School progression query will be summarized at weeks 48 and 96 for each treatment using counts and proportions

### **6.2.3 Missing data**

For all analyses using logistic regression and survival analyses, missing values may be imputed.

## **6.3 Safety Data**

### **6.3.1 Analysis Population**

The analysis population for safety summaries will be all subjects who received at least 1 dose of study medication (BG00012 or IFN  $\beta$ -1a).

### **6.3.2 Analysis Methods**

Summaries of safety data will include descriptive statistics for continuous variables and frequency distributions for categorical variables. All AEs, laboratory abnormalities, ECG, and vital signs will be evaluated for safety. Incidence of treatment emergent AEs will be summarized for each treatment group and overall. An event is considered treatment emergent if the start date of the AE is on or after the first dose date or the existing AE worsened after the first dose date. Other safety data will also be summarized by treatment group.

#### **6.3.2.1 Definition of Baseline Value and Visit Windows**

Baseline values and visit windows for safety summaries are defined in the same way as they are for efficacy analyses (see Section 6.1.1 and 6.1.7, respectively).

#### **6.3.2.2 Clinical Adverse Events**

Treatment-emergent AEs are defined as AEs occurring or worsening after beginning study treatment (after the first dose in this study).

CONFIDENTIAL

The information contained herein may not be used, disclosed, or published without the written consent of Biogen MA Inc.



Incidence of AEs will be summarized using frequency distribution tables; overall, by severity, and by relationship to study treatment. The summary tables will include incidences for system organ class (SOC) as well as for preferred terms (PT) within each system organ class. Similar incidence analyses will be summarized for SAEs and for the most common AEs. In addition to summaries of incidence by both SOC and PT, incidence of adverse events may also be summarized and presented by High-Level Group Term (HLGT) or High-Level Term (HLT), if considered appropriate for signal detection, in instances where the SOC level of summary is too broad but the PT level of summary is too granular.

AEs will be coded using the MedDRA dictionary (version 19.1). This coding system provides five levels to classify AEs. In general, AEs will be presented by system organ class and preferred term.

The summary tables will include incidence estimates for overall system organ class as well as for preferred terms within each system organ class. AEs will be presented in the order of decreasing incidence of system organ class and then by preferred term within system organ class.

Summaries of the most frequent occurring AEs (PTs that occur in at least 5% of the subjects in any treatment group) will be presented by treatment group for each preferred term.

The incidence of AEs by SOC and PT may also be presented by time intervals (e.g., using a 12 week time interval). Other time intervals may be explored as well to elucidate trends over time. For such analyses, for a given time interval, the number of subjects who were followed for adverse events during that time interval will be presented along with the AE incidence during that time interval. Therefore, for a given SOC or PT, subjects will be counted only once for a given time interval but may be counted more than once across time intervals.

If a subject experiences an event more than once during the study, he/she will be counted only once using the maximum severity if more than one severity is reported, within each system organ class/preferred term.

AEs will be classified by severity (mild, moderate and severe) and by relationship to study treatment.

The incidence of SAEs will be presented by system organ class and preferred term. Details of each SAE will be listed, including subject ID, system organ class/preferred term, date of onset, severity, relationship to study treatment and action taken. Subject narratives will also be provided.

The incidence of AEs that led to early withdrawal from the study will be presented separately. A listing of the individual subjects with these AEs will also be presented.

CONFIDENTIAL

The information contained herein may not be used, disclosed, or published without the written consent of  
Biogen MA Inc.

The incidence of AEs that led to treatment discontinuation during the study will be presented in a separate table, along with a listing of these individual subjects who experienced AEs leading to treatment discontinuation.

The incidence of AEs of special interest by PT will be presented by treatment group and overall. These will be summarized by SOC and PT and may include the following:

- Flushing and other related symptoms;
- Gastrointestinal tolerability (nausea, abdominal pain, diarrhea, etc.);
- Infections, including potential opportunistic infections;
- Ischaemic cardiovascular disorders;
- Hepatic disorders;
- Renal disorders;
- Malignancies;
- Lymphopenia and Leukopenia.

### **6.3.2.3 Clinical Laboratory Data**

The following clinical laboratory parameters are assessed per the protocol:

- Hematology: hemoglobin, hematocrit, red blood cell count, WBC count (with differential) and platelet count.
- Blood chemistry: sodium, potassium, chloride, total bilirubin, alkaline phosphatase, ALT, AST, GGT, BUN, creatinine, bicarbonate, calcium, magnesium, phosphate, uric acid, and glucose
- Coagulation: partial thromboplastin time, prothrombin time, and international normalized ratio
- Urine pregnancy tests
- Endocrine tests (until the subject has reached bone age of  $\geq 16$  years or until the subject is postmenarche): insulin-like growth factor 1, insulin-like growth factor binding protein, follicle-stimulating hormone, luteinizing hormone, estradiol, and testosterone

CONFIDENTIAL

The information contained herein may not be used, disclosed, or published without the written consent of  
Biogen MA Inc.

- Urinalysis: color, specific gravity, pH, protein, glucose, blood, ketones, and microscopy (urine cytology,  $\beta_2$ -microglobulin, and microalbumin will be included in summaries if available)

Each laboratory value for each subject will be flagged as ‘low’, ‘normal’, or ‘high’, relative to the parameter’s normal range. Each subject’s urinalysis values will be flagged as “positive”, “negative”, or if no value is available, “unknown”.

Shifts from normal baseline to any visit post baseline high/low status for all hematology and blood chemistry parameters, and shifts from normal baseline to high/positive status for urinalysis will be presented. In addition, shifts from baseline to the worst post-baseline value will be presented for relevant laboratory tests by treatment group by clinically relevant categories (e.g.,  $\leq$  ULN,  $>1 - <3 \times$ ULN,  $\geq 3 - 5 \times$ ULN,  $>5 - 10 \times$ ULN,  $>10 - 20 \times$  ULN,  $>20 \times$  ULN, etc.). For hematology parameters, shift table categories may be defined based on potentially clinically significant cutoffs (e.g.,  $< 3.0 \times 10^9/L$  and  $\geq 16 \times 10^9/L$  for WBC and  $<0.8 \times 10^9/L$ ,  $<0.5 \times 10^9/L$ , and  $> 12 \times 10^9/L$  for lymphocytes). For qualitative urinalysis parameters, categories may be defined based on the qualitative categories (e.g., normal/negative, trace, 1+, 2+, 3+, etc.).

Summary statistics at each visit will also be provided for all absolute laboratory values as well as change from baseline, by study treatment. The summaries for laboratory data will be data from baseline to each time point, including early withdrawal. Graphs showing the mean or change from baseline values in certain laboratory assessments may be presented as well. These graphs will include eosinophils, lymphocytes, neutrophils, and liver function tests (bilirubin, AST, ALT, ALP, BILI, and GGT).

The number and percent of subjects who complete treatment in Part 1 (do not continue into Part 2), temporary withhold medication during Part 1, or completely discontinue treatment and have a lymphocyte count  $< LLN$ , will be summarized for both treatment groups and overall. The time until recovery (when the lymphocyte count  $\geq LLN$ ) will be summarized as well.

#### 6.3.2.4 Radiological Safety Assessments

- Gd-enhanced brain MRIs for relapses – counts of Gd-enhanced lesions which can measure MRI activity
- X-ray of the left hand and wrist to determine bone age will be performed at baseline for all male subjects and for female subjects who are premenarche (if permitted by local regulatory authority) until the subject has reached bone age of  $\geq 16$  years or once the subject is postmenarche

These data will be summarized using either counts and percents or by descriptive statistics by study treatment along with the exploratory endpoints as follows:

CONFIDENTIAL

The information contained herein may not be used, disclosed, or published without the written consent of  
Biogen MA Inc.

### 6.3.2.5 Vital Signs Data

The analysis of vital signs will focus on the incidence of clinically relevant abnormalities. The number of subjects evaluated and the number and percentage of subjects with clinically relevant post-baseline abnormalities will be presented. The criteria for clinically relevant post-baseline abnormalities are shown in the following table (Table 2). Summary statistics for actual values and change from baseline will also be presented.

**Table 2 Criteria to Determine Clinically Relevant Abnormalities in Vital Signs**

| Vital Sign               | Criteria for Abnormalities                                                                                            |
|--------------------------|-----------------------------------------------------------------------------------------------------------------------|
| Temperature              | >38°C or an increase from baseline of at least 1°C                                                                    |
| Pulse                    | >120 beats per minute (bpm) or an increase from baseline of >20 bpm<br><50 bpm or a decrease from baseline of >20 bpm |
| Systolic Blood Pressure  | >180 mmHg or an increase from baseline of >40 mmHg<br><90 mmHg or a decrease from baseline of >30 mmHg                |
| Diastolic Blood Pressure | >105 mmHg or an increase from baseline of >30 mmHg<br><50 mmHg or a decrease from baseline of >20 mmHg                |
| Respiratory Rate         | <10 or >30 breaths per minute after taking dose                                                                       |

### 6.3.2.6 12-Lead ECG

The analysis of ECG will be summarized at each timepoint, presenting only frequencies of Normal, Abnormal – no adverse event, and Abnormal – adverse event.

### 6.3.2.7 Height and Weight

The analysis of height and weight will be summarized at each timepoint by study treatment, presenting descriptive statistics for both, including both absolute values and change from baseline.

CONFIDENTIAL

The information contained herein may not be used, disclosed, or published without the written consent of  
Biogen MA Inc.
