# Supplementary material for: Effect of Dimethyl Fumarate vs Interferon β-1a in Patients With Pediatric-Onset Multiple Sclerosis: The CONNECT Randomized Clinical Trial
Source: PubMed Central journal article supplement — JAMA Netw Open. 2022 Sep 28;5(9):e2230439. doi: 10.1001/jamanetworkopen.2022.30439 (PMC9520348; doi:10.1001/jamanetworkopen.2022.30439), 2022-09-28
Supplement: jamanetwopen-e2230439-s003.pdf [file jamanetwopen-e2230439-s003.pdf]

## Data Sharing Statement

Vermersch P, Scaramozza M, Levin S, et al. Effect of dimethyl fumarate vs interferon  $\beta$ -1a in patients with pediatric-onset multiple sclerosis. *JAMA Netw Open*. 2022;5(9):e2230439. doi:10.1001/jamanetworkopen.2022.30439

### Data

**Data available:** Yes

**Data types:** Other (please specify)

**Additional Information:** Study data will be shared in accordance with applicable regulations and laws.

**How to access data:** Requests for data supporting this article should be submitted to the Biogen Clinical Data Request Portal ([biogenclinicaldatarequest.com](https://biogenclinicaldatarequest.com))

**When available:** With publication

### Supporting Documents

**Document types:** None

### Additional Information

**Who can access the data:** Researchers whose proposed use of the data has been approved

**Types of analyses:** Dependent upon request

**Mechanisms of data availability:** Dependent upon request
